# Supplementary material
Source: PubMed Central journal article supplement (PMC7251565)

| Parameter                | Value          |
|--------------------------|----------------|
| 1 Solvent                | DMSO           |
| 2 Temperature            | 298.0          |
| 3 Pulse Sequence         | zg30           |
| 4 Experiment             | 1D             |
| 5 Number of Scans        | 64             |
| 6 Relaxation Delay       | 1.0000         |
| 7 Spectrometer Frequency | 400.13         |
| 8 Nucleus                | <sup>1</sup> H |

<sup>1</sup>H NMR (400 MHz, DMSO-*d*<sub>6</sub>) δ 7.34 (dd, *J* = 8.2, 1.7 Hz, 2H), 7.32 – 7.27 (m, 2H), 7.25 – 7.19 (m, 1H), 2.81 – 2.74 (m, 1H), 2.67 (d, *J* = 5.8 Hz, 1H), 2.63 (dt, *J* = 6.0, 3.1 Hz, 1H), 2.25 (d, *J* = 5.9 Hz, 1H), 2.01 (d, *J* = 3.2 Hz, 1H), 1.37 (s, 10H).

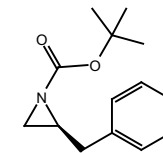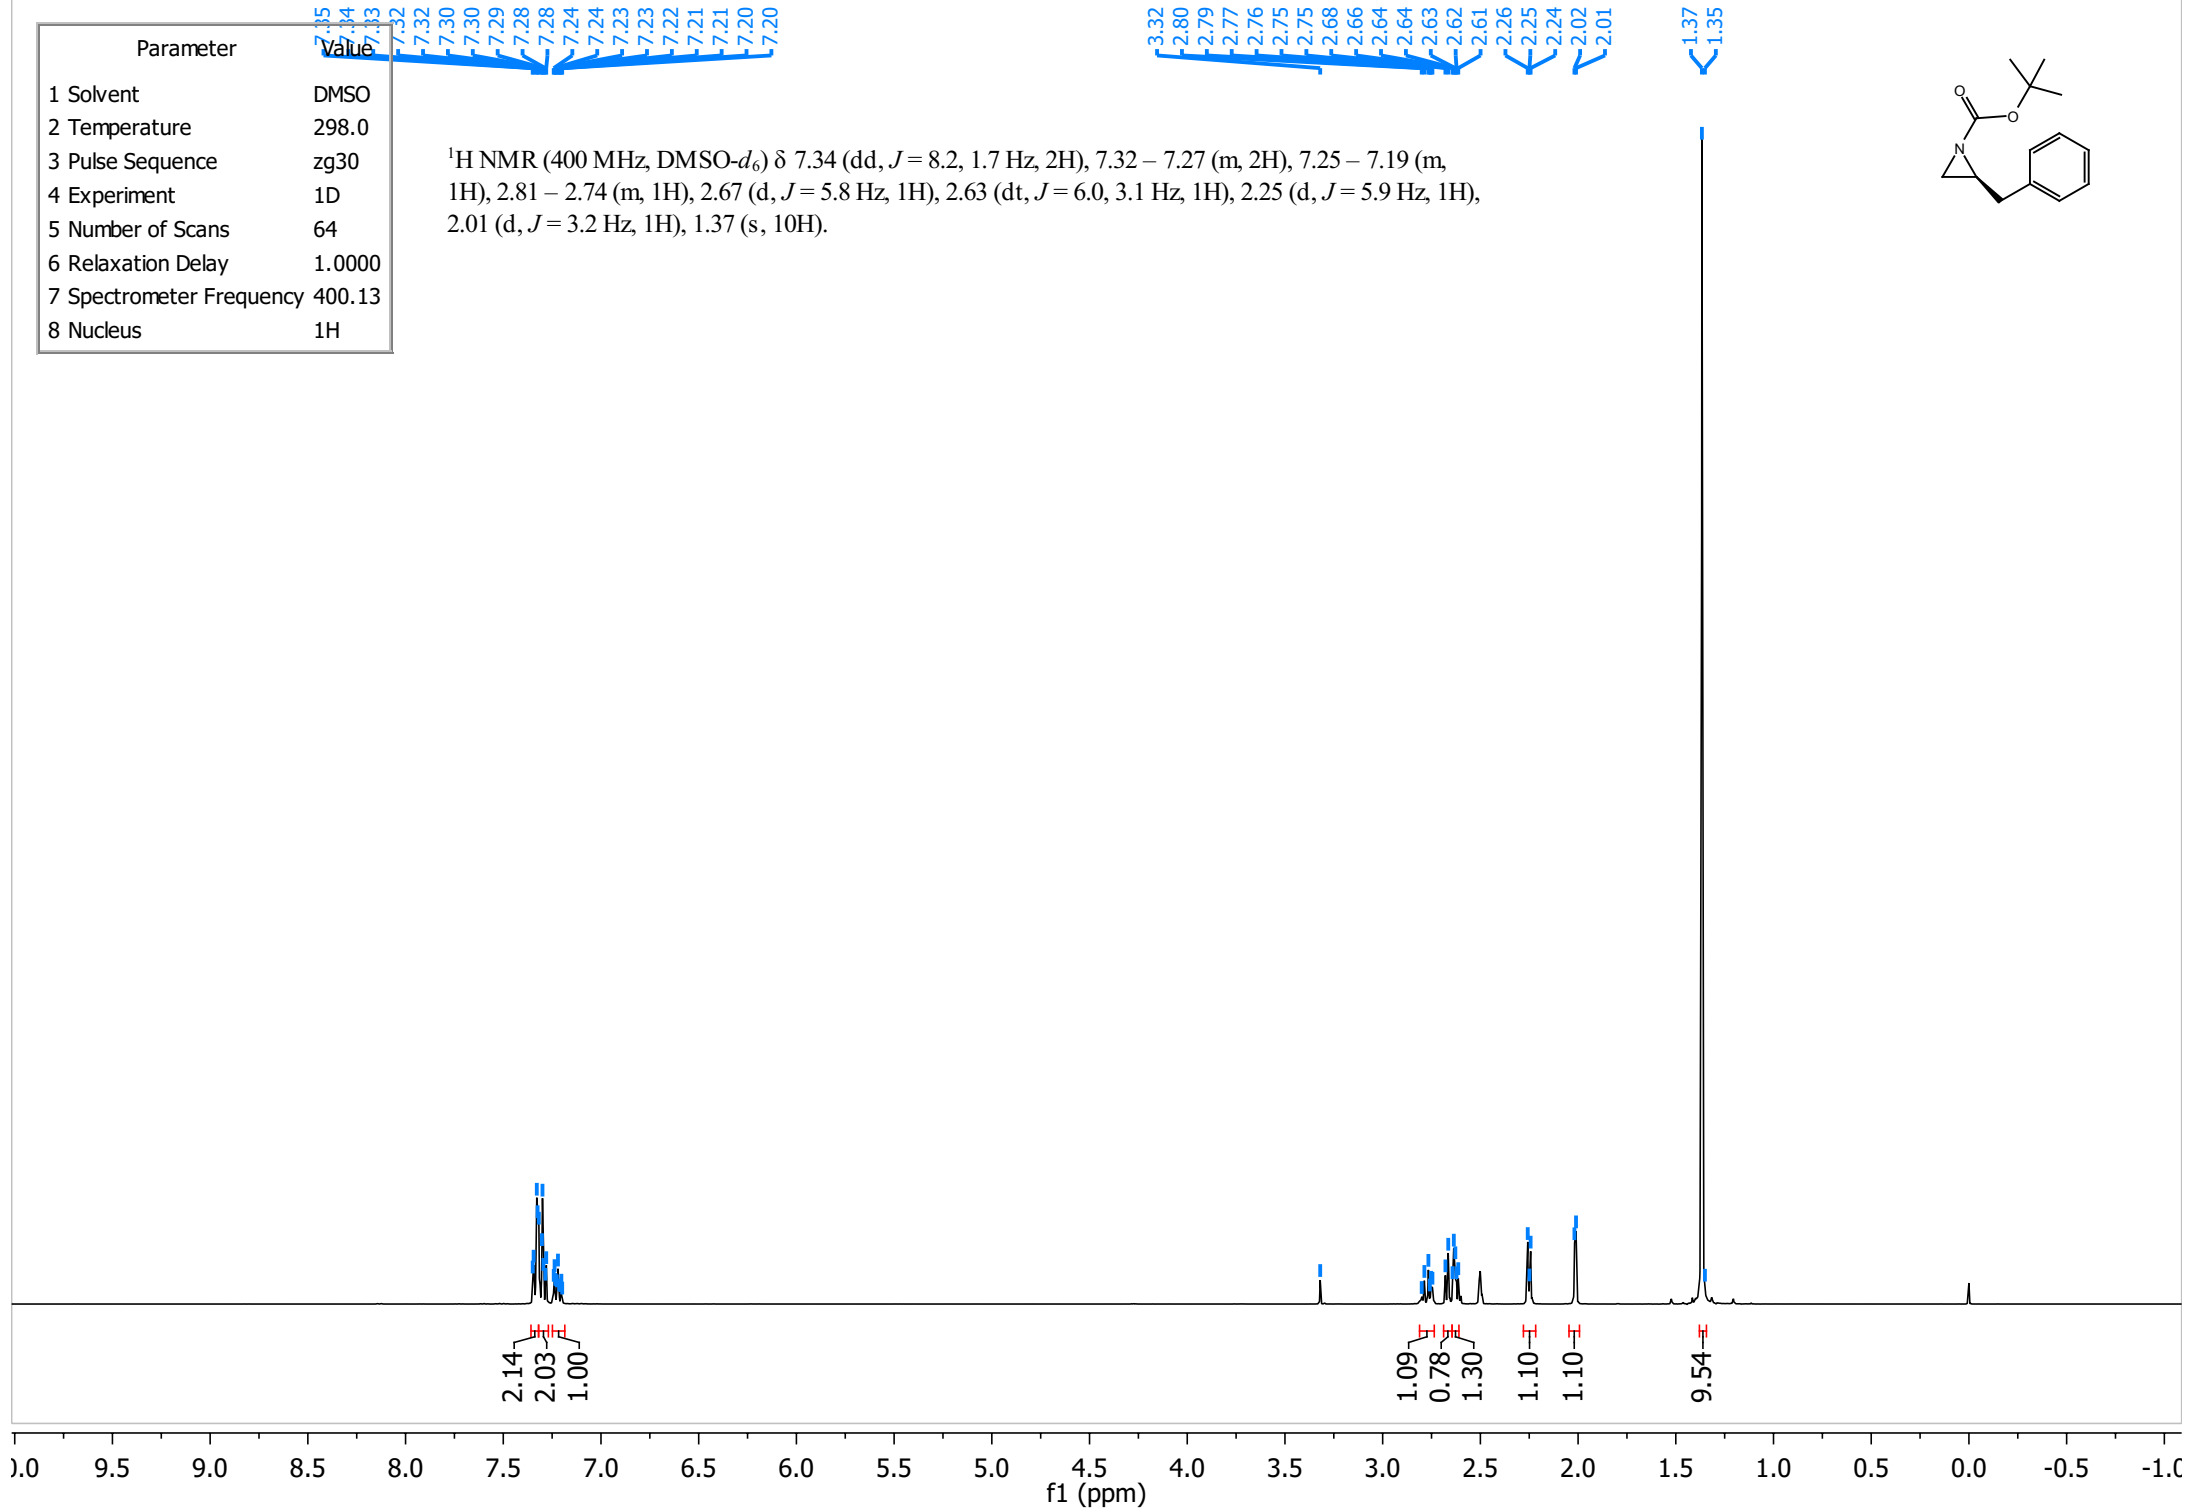

| Parameter                | Value           |
|--------------------------|-----------------|
| 1 Solvent                | DMSO            |
| 2 Temperature            | 298.0           |
| 3 Pulse Sequence         | zgpg30          |
| 4 Experiment             | 1D              |
| 5 Number of Scans        | 2056            |
| 6 Relaxation Delay       | 2.0000          |
| 7 Spectrometer Frequency | 100.61          |
| 8 Nucleus                | <sup>13</sup> C |

<sup>13</sup>C NMR (101 MHz, DMSO-*d*<sub>6</sub>) δ  
161.58, 138.21, 128.71, 128.20, 126.27,  
80.10, 37.67, 37.59, 30.76, 27.54.

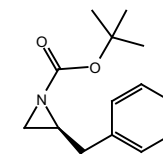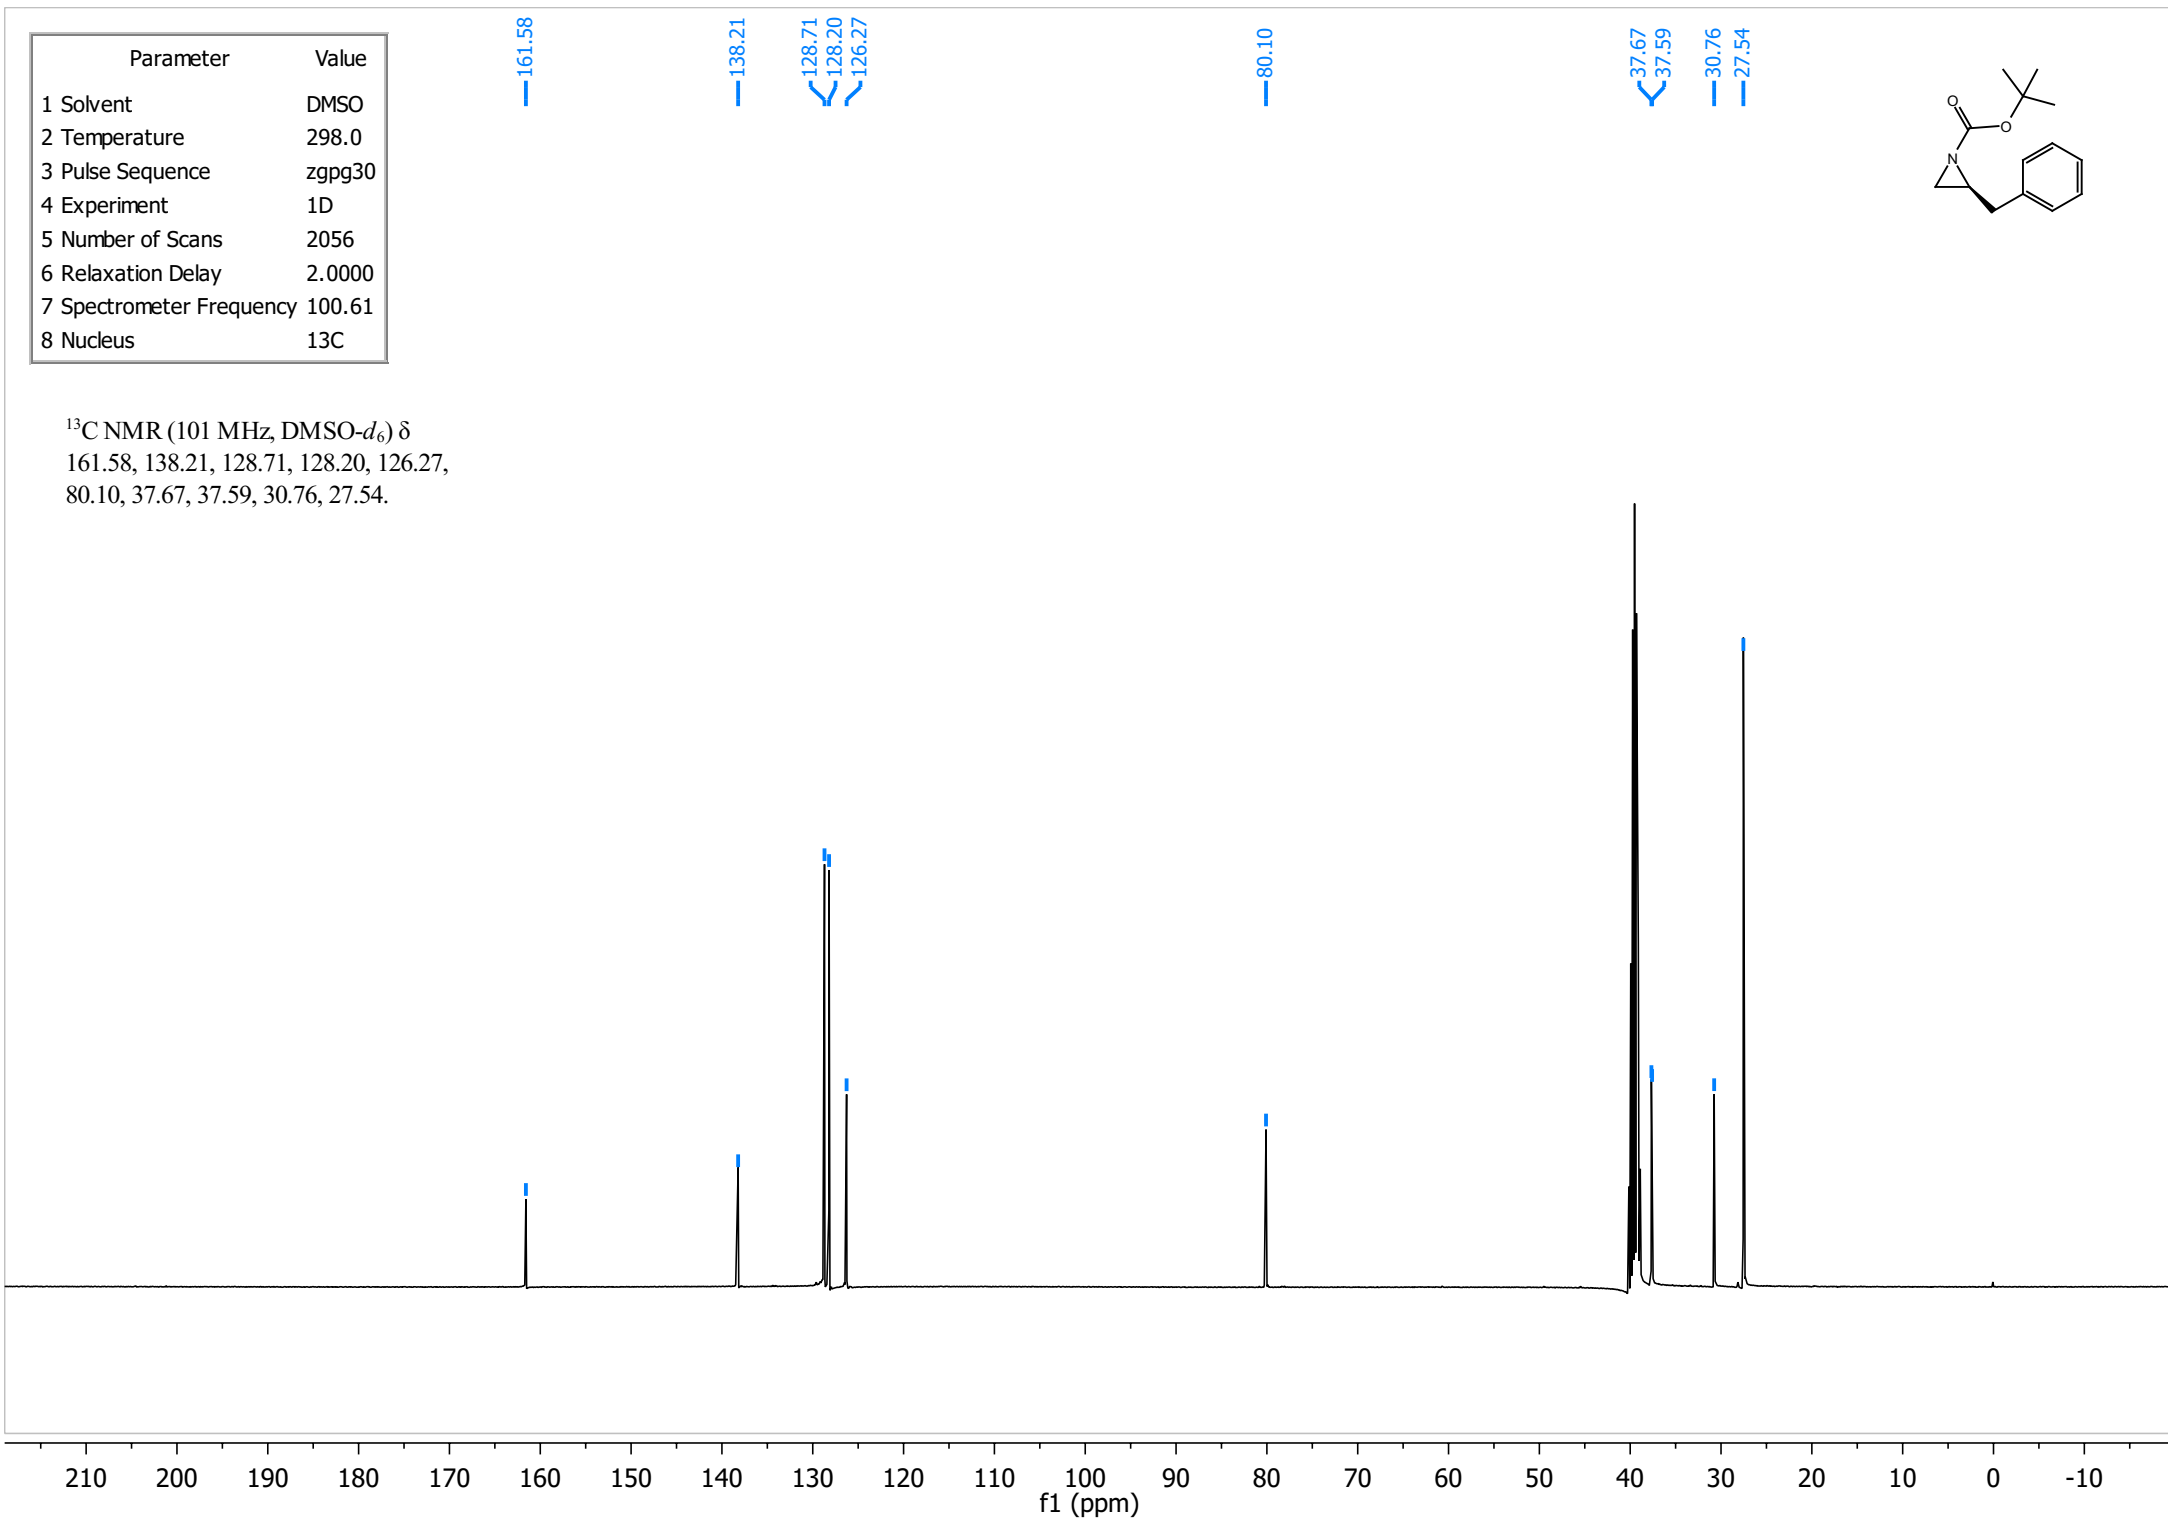

| Parameter                | Value               |
|--------------------------|---------------------|
| 1 Solvent                | DMSO                |
| 2 Temperature            | 298.0               |
| 3 Pulse Sequence         | zg30                |
| 4 Experiment             | 1D                  |
| 5 Number of Scans        | 600                 |
| 6 Relaxation Delay       | 1.0000              |
| 7 Acquisition Date       | 2017-08-21T19:54:59 |
| 8 Spectrometer Frequency | 400.13              |
| 9 Nucleus                | <sup>1</sup> H      |

7.27  
7.25  
7.21  
7.19  
7.17  
7.04  
7.02  
7.00  
6.89  
6.87  
6.66  
6.64

3.80

3.32 HDO

2.84  
2.81  
2.75  
2.64  
2.62

2.59  
2.50 DMSO  
2.37  
2.34

2.09  
1.97  
1.93

1.33  
1.29  
1.26

0.00

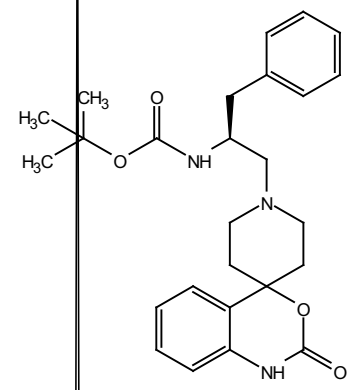

<sup>1</sup>H NMR (400 MHz, DMSO-*d*<sub>6</sub>) δ 10.18 (s, 1H), 7.22 (dt, *J* = 16.7, 7.9 Hz, 7H), 7.02 (t, *J* = 7.3 Hz, 1H), 6.88 (d, *J* = 7.7 Hz, 1H), 6.65 (d, *J* = 8.1 Hz, 1H), 3.80 (s, 1H), 2.87 – 2.71 (m, 3H), 2.66 – 2.58 (m, 1H), 2.45 – 2.27 (m, 4H), 2.06 – 1.86 (m, 4H), 1.33 (s, 9H).

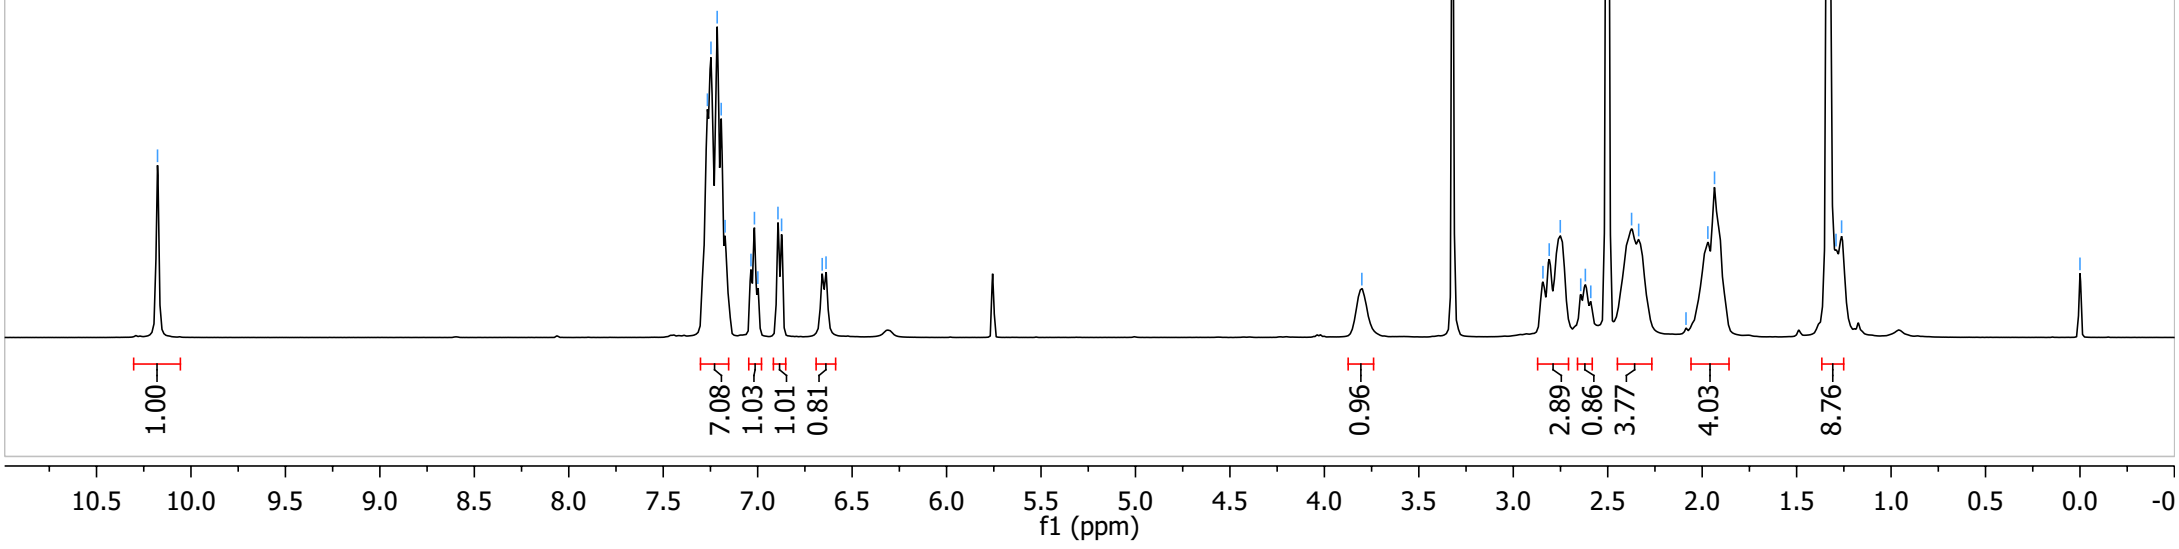

| Parameter                | Value               |
|--------------------------|---------------------|
| 1 Solvent                | DMSO                |
| 2 Temperature            | 298.0               |
| 3 Pulse Sequence         | zgpg30              |
| 4 Experiment             | 1D                  |
| 5 Number of Scans        | 2000                |
| 6 Relaxation Delay       | 2.0000              |
| 7 Acquisition Date       | 2017-08-21T21:50:35 |
| 8 Spectrometer Frequency | 100.61              |
| 9 Nucleus                | 13C                 |

— 155.75 — 150.68 — 139.87 — 135.73 — 129.59 — 129.26 — 128.48 — 126.27 — 125.87 — 123.66 — 123.22 — 114.63  
 — 80.26 — 77.85 — 62.44 — 55.39 — 49.94 — 48.67 — 48.61 — 39.03 — 35.21 — 28.74

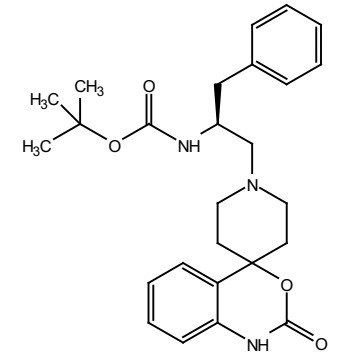

<sup>13</sup>C NMR (101 MHz, DMSO-*d*<sub>6</sub>) δ 155.75, 150.68, 139.87, 135.73, 129.59, 129.26, 128.48, 126.27, 125.87, 123.66, 123.22, 114.63, 80.26, 77.85, 62.44, 55.39, 49.94, 48.67, 48.61, 39.03, 35.21, 28.74.

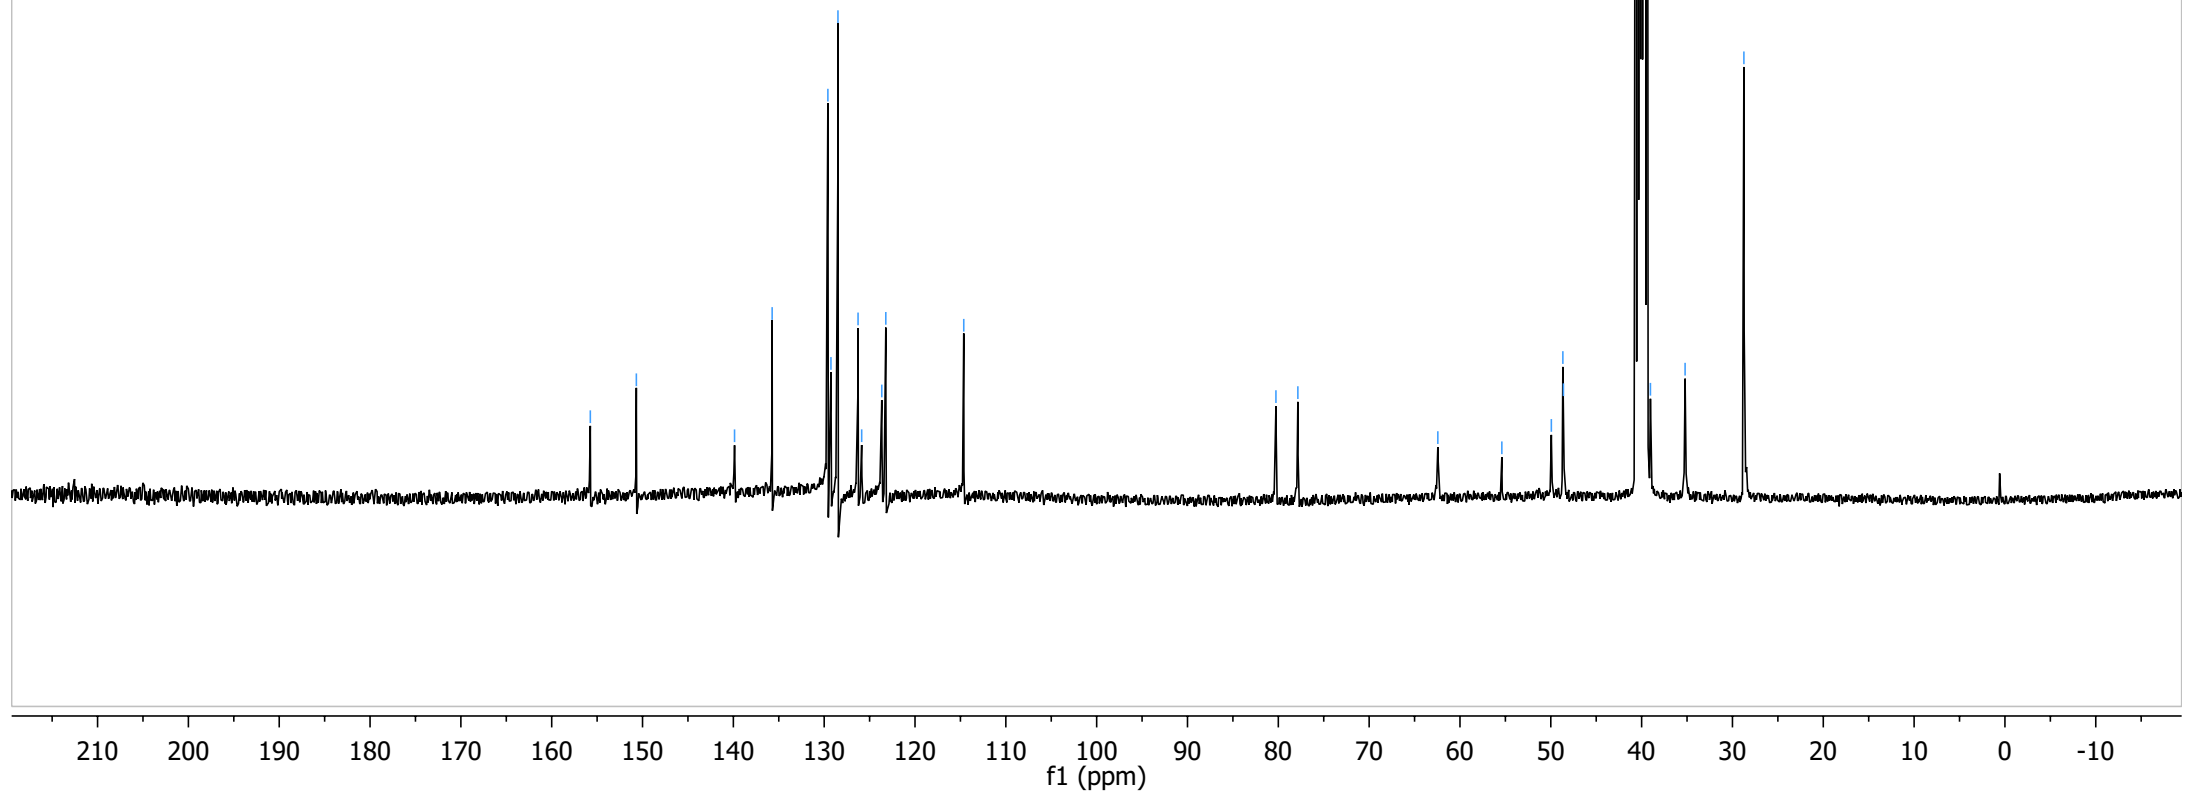

| Parameter                | Value               |
|--------------------------|---------------------|
| 1 Solvent                | DMSO                |
| 2 Temperature            | 298.0               |
| 3 Pulse Sequence         | zg30                |
| 4 Experiment             | 1D                  |
| 5 Number of Scans        | 1600                |
| 6 Relaxation Delay       | 1.0000              |
| 7 Acquisition Date       | 2017-09-08T02:42:43 |
| 8 Spectrometer Frequency | 400.14              |
| 9 Nucleus                | <sup>1</sup> H      |

7.41  
7.38  
7.32  
7.31  
7.29  
7.18  
7.14  
7.12  
7.11  
7.10  
7.08  
6.96  
6.94

4.19  
3.71  
3.70  
3.68  
3.57  
3.43  
3.18  
3.17  
3.15  
3.13  
3.01  
2.97  
2.95  
2.94  
2.91  
2.59  
2.51 DMSO  
2.26  
2.23

<sup>1</sup>H NMR (400 MHz, DMSO-*d*<sub>6</sub>) δ 10.41 (s, 1H), 8.73 (s, 2H), 7.38 (s, 4H), 7.31 (t, *J* = 6.9 Hz, 2H), 7.17 – 7.07 (m, 2H), 6.95 (d, *J* = 7.9 Hz, 1H), 4.19 (s, 1H), 3.78 – 3.63 (m, 1H), 3.57 (s, 4H), 3.16 (dd, *J* = 13.7, 4.9 Hz, 1H), 3.07 – 2.90 (m, 2H), 2.59 (s, 2H), 2.24 (d, *J* = 14.1 Hz, 2H).

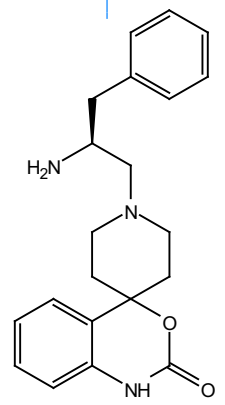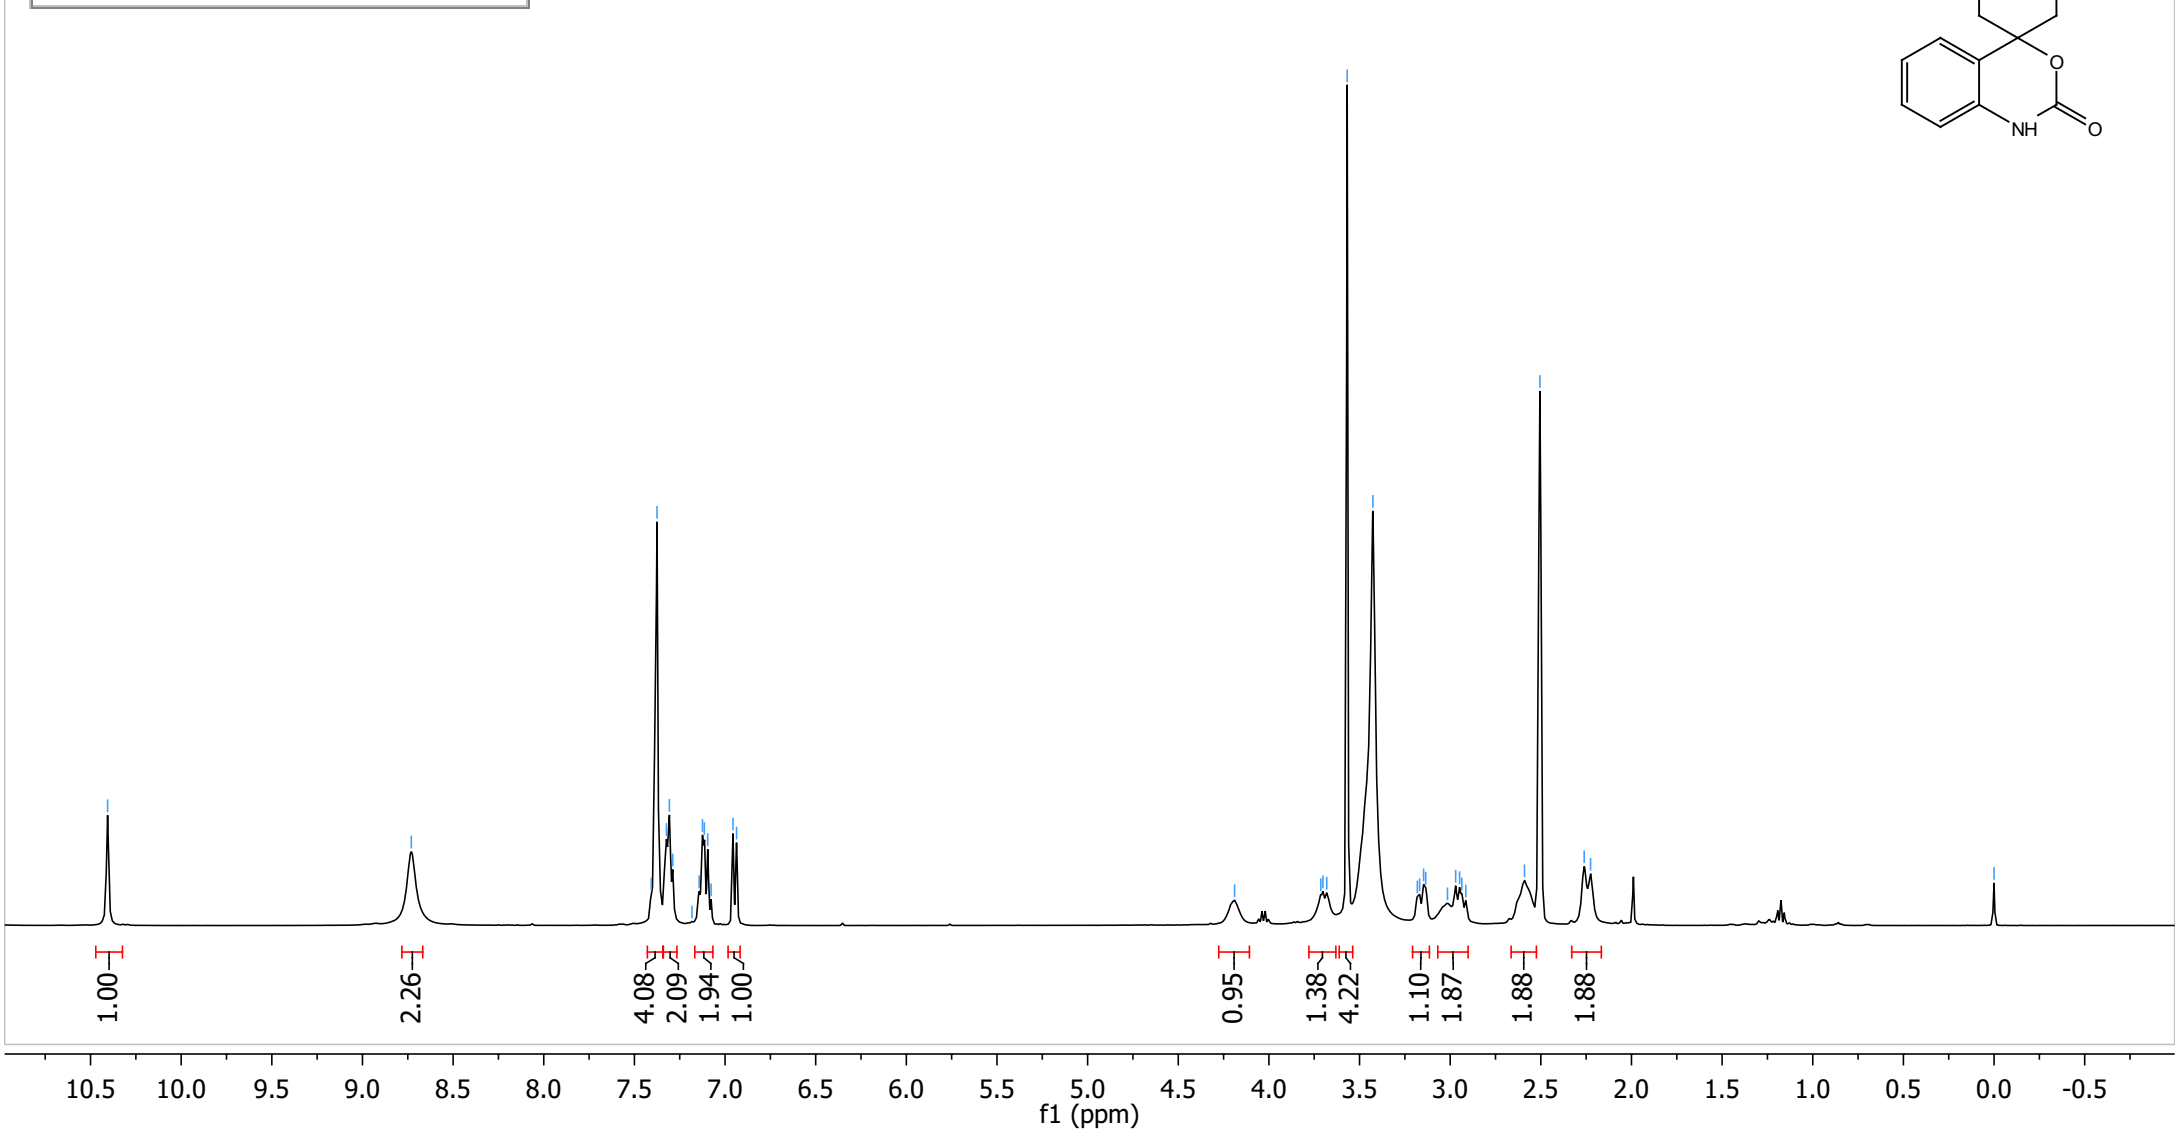

| Parameter                | Value               |
|--------------------------|---------------------|
| 1 Solvent                | DMSO                |
| 2 Temperature            | 298.0               |
| 3 Pulse Sequence         | zgpg30              |
| 4 Experiment             | 1D                  |
| 5 Number of Scans        | 6144                |
| 6 Relaxation Delay       | 2.0000              |
| 7 Acquisition Date       | 2017-09-08T00:24:58 |
| 8 Spectrometer Frequency | 100.62              |
| 9 Nucleus                | 13C                 |

$^{13}\text{C}$  NMR (101 MHz,  $\text{DMSO}-d_6$ )  $\delta$  149.57, 135.54, 135.49, 129.97, 129.92, 129.26, 127.74, 123.55, 123.44, 115.01, 77.86, 66.82, 58.03, 49.92, 47.74, 47.44, 36.97, 32.85, 32.73.

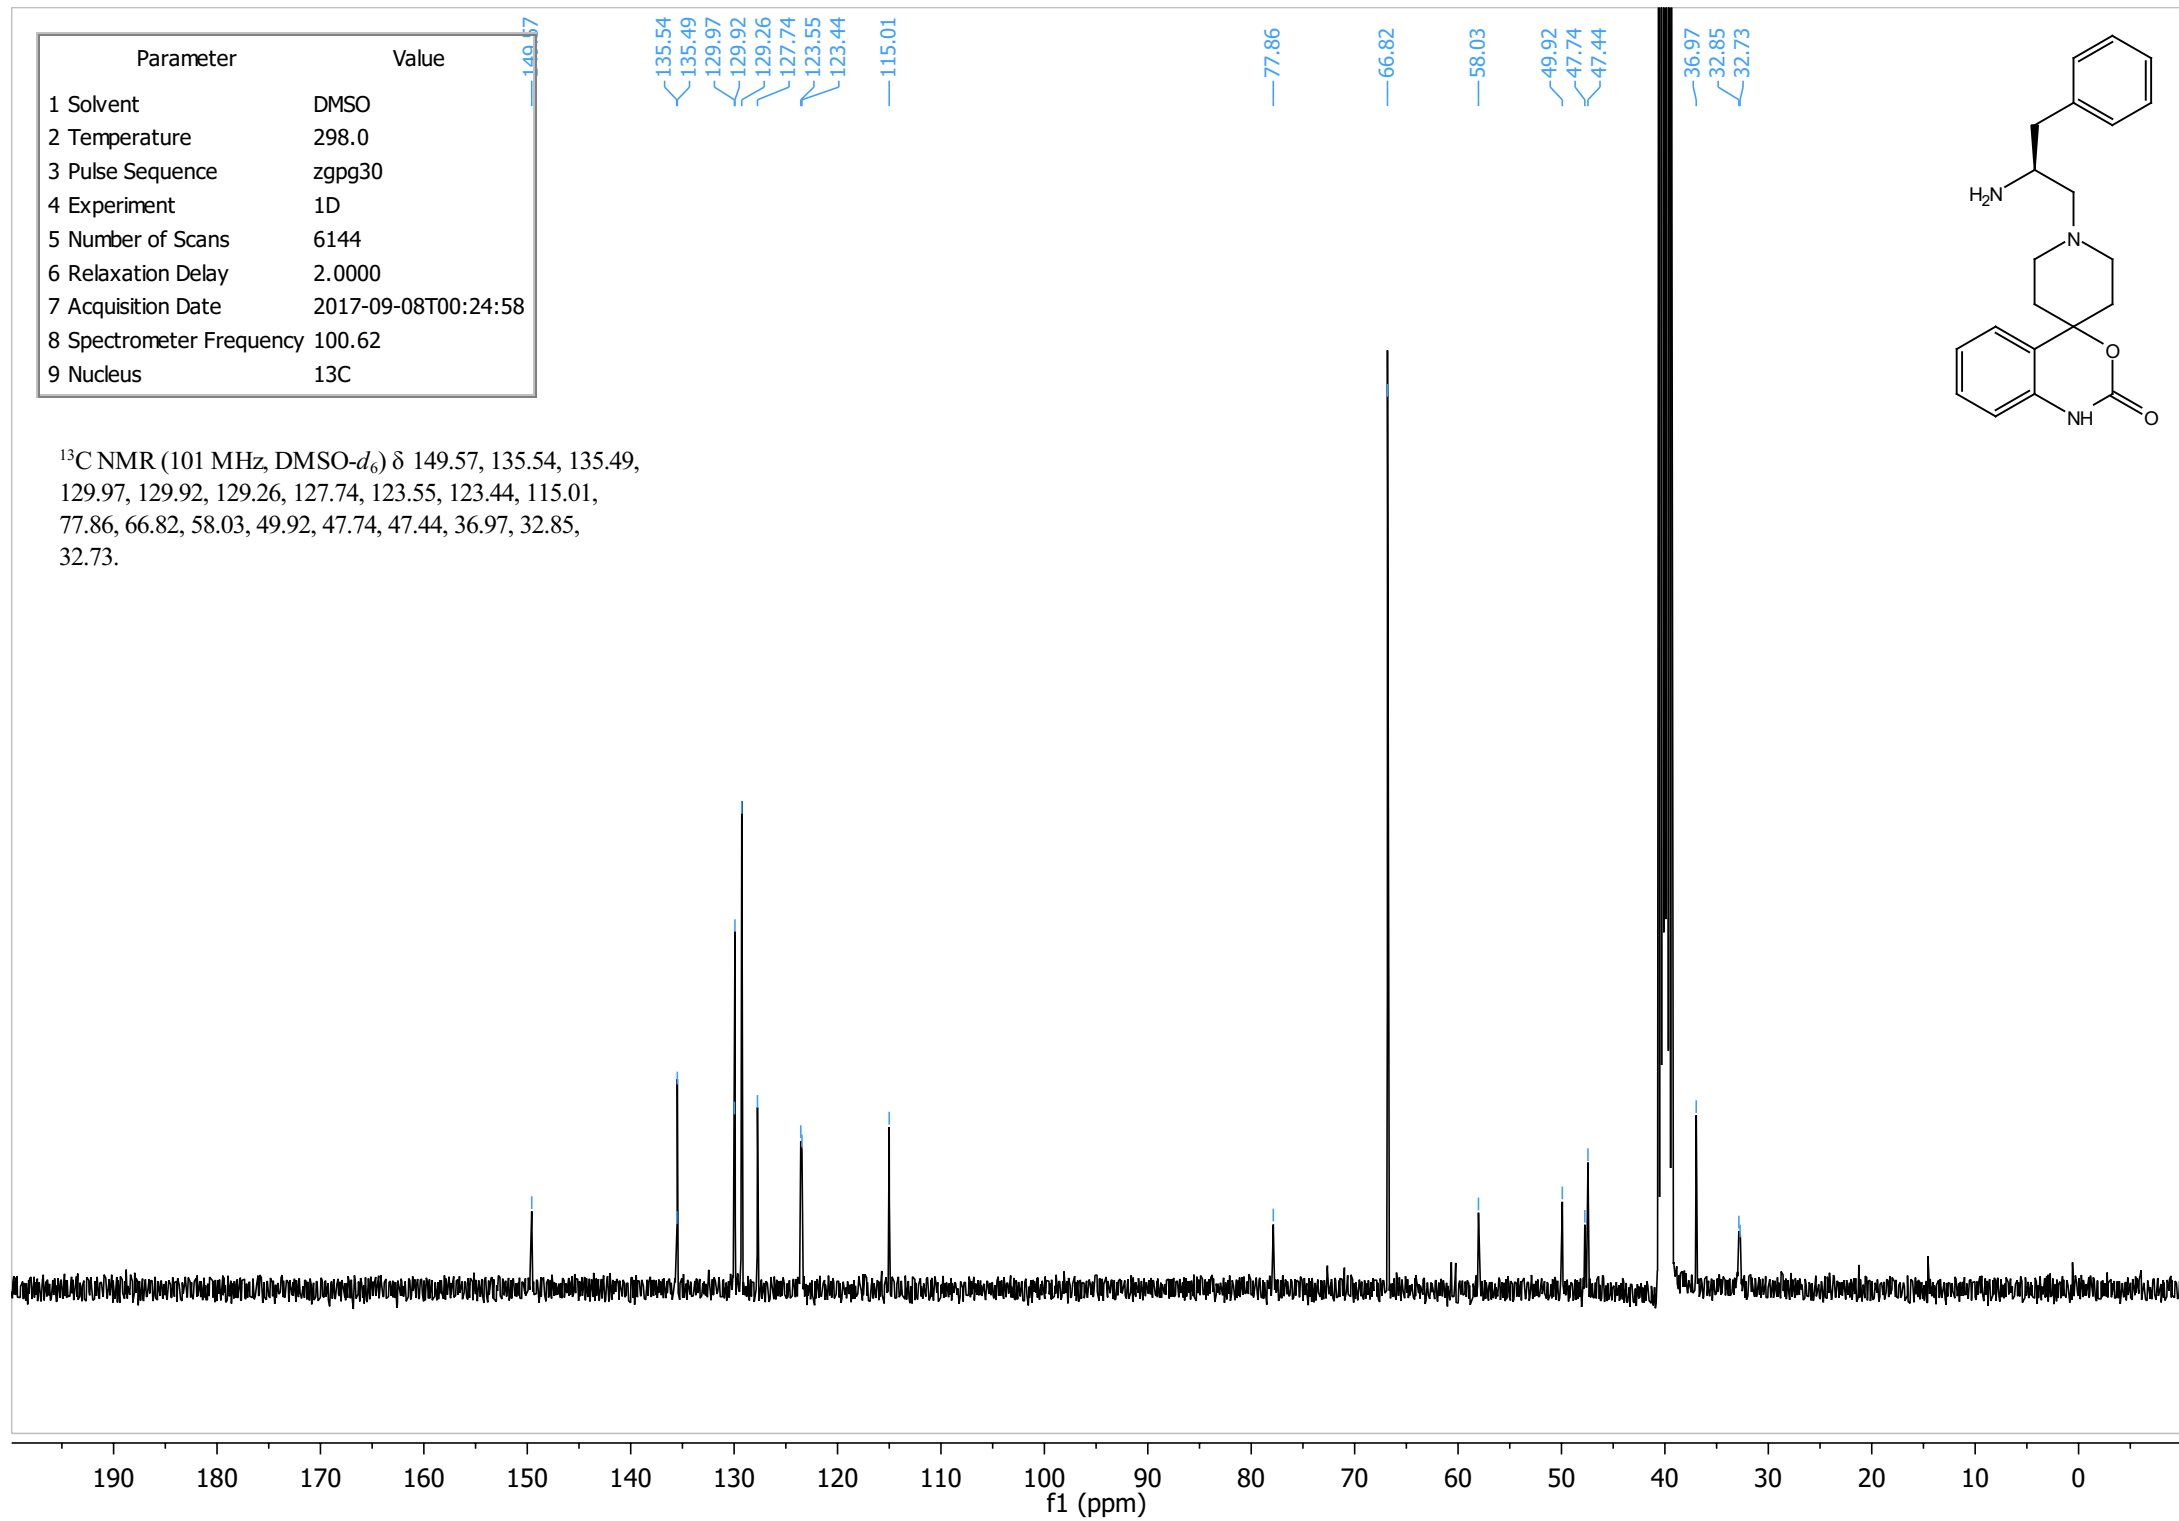

| Parameter                | Value               |
|--------------------------|---------------------|
| 1 Solvent                | DMSO                |
| 2 Temperature            | 298.0               |
| 3 Pulse Sequence         | zg30                |
| 4 Experiment             | 1D                  |
| 5 Number of Scans        | 1600                |
| 6 Relaxation Delay       | 1.0000              |
| 7 Acquisition Date       | 2017-09-18T21:54:24 |
| 8 Spectrometer Frequency | 400.14              |
| 9 Nucleus                | 1H                  |

7.90  
7.88  
7.58  
7.56  
7.31  
7.29  
7.22  
7.21  
7.17  
7.15  
7.13  
7.11  
7.07  
7.05  
6.95  
6.93  
6.91  
6.90  
6.88  
6.81  
6.79

4.17  
4.15

3.32 HDO  
3.26  
2.98  
2.96  
2.94  
2.93  
2.81  
2.80  
2.78  
2.76  
2.73  
2.70  
2.51  
2.49  
2.48  
2.46  
2.43 DMSO  
2.41  
2.39  
2.37  
2.36  
2.33  
2.31  
1.91  
1.88  
1.86  
1.82  
1.78  
0.00

<sup>1</sup>H NMR (400 MHz, DMSO-*d*<sub>6</sub>) δ 10.10 (s, 1H), 7.89 (d, *J* = 7.8 Hz, 1H), 7.57 (d, *J* = 7.7 Hz, 1H), 7.30 (d, *J* = 8.0 Hz, 1H), 7.21 (d, *J* = 3.9 Hz, 4H), 7.16 – 7.11 (m, 2H), 7.06 (d, *J* = 7.7 Hz, 1H), 6.91 (dt, *J* = 14.2, 7.6 Hz, 2H), 6.80 (d, *J* = 7.9 Hz, 1H), 4.22 – 4.08 (m, 1H), 2.95 (dd, *J* = 13.6, 5.0 Hz, 1H), 2.84 – 2.67 (m, 3H), 2.47 (d, *J* = 6.8 Hz, 1H), 2.42 – 2.28 (m, 3H), 1.85 (p, *J* = 14.0, 13.1 Hz, 4H).

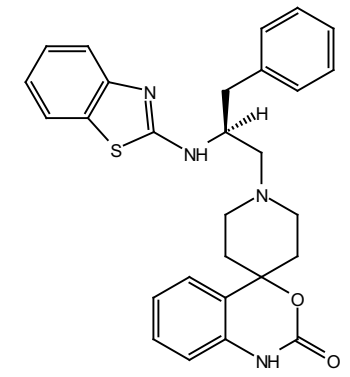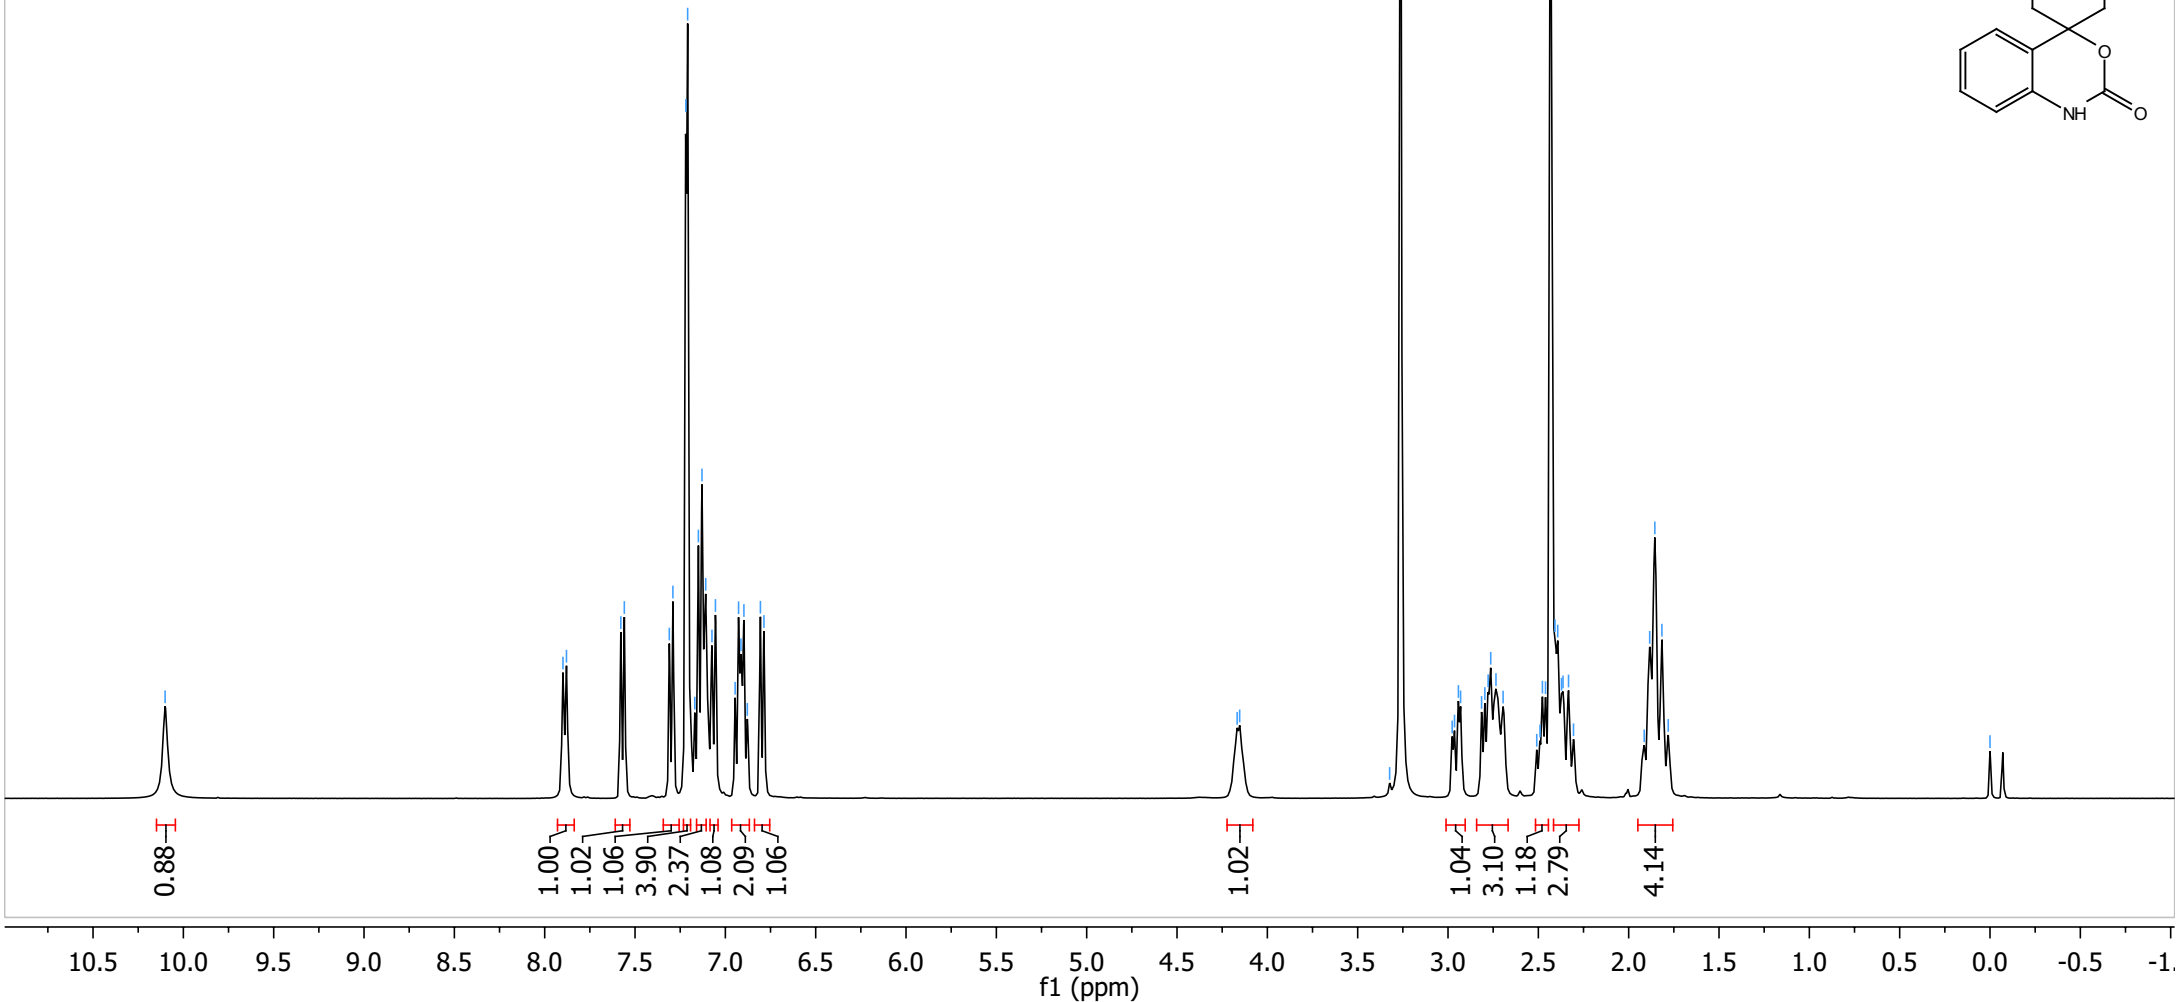

| Parameter                | Value  |
|--------------------------|--------|
| 1 Solvent                | DMSO   |
| 2 Temperature            | 298.0  |
| 3 Pulse Sequence         | zgpg30 |
| 4 Experiment             | 1D     |
| 5 Number of Scans        | 6144   |
| 6 Relaxation Delay       | 2.0000 |
| 7 Spectrometer Frequency | 100.62 |
| 8 Nucleus                | 13C    |

$^{13}\text{C}$  NMR (101 MHz, DMSO)  $\delta$  166.32, 153.15, 150.67, 139.40, 135.68, 130.59, 129.75, 129.21, 128.60, 126.49, 125.96, 125.81, 123.72, 123.17, 121.29, 121.20, 118.43, 114.58, 80.26, 61.52, 54.43, 48.85, 48.66, 38.52, 35.30, 35.13.

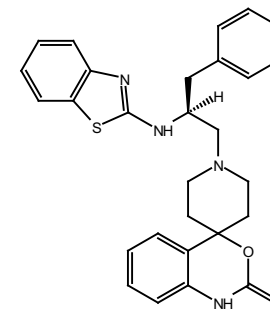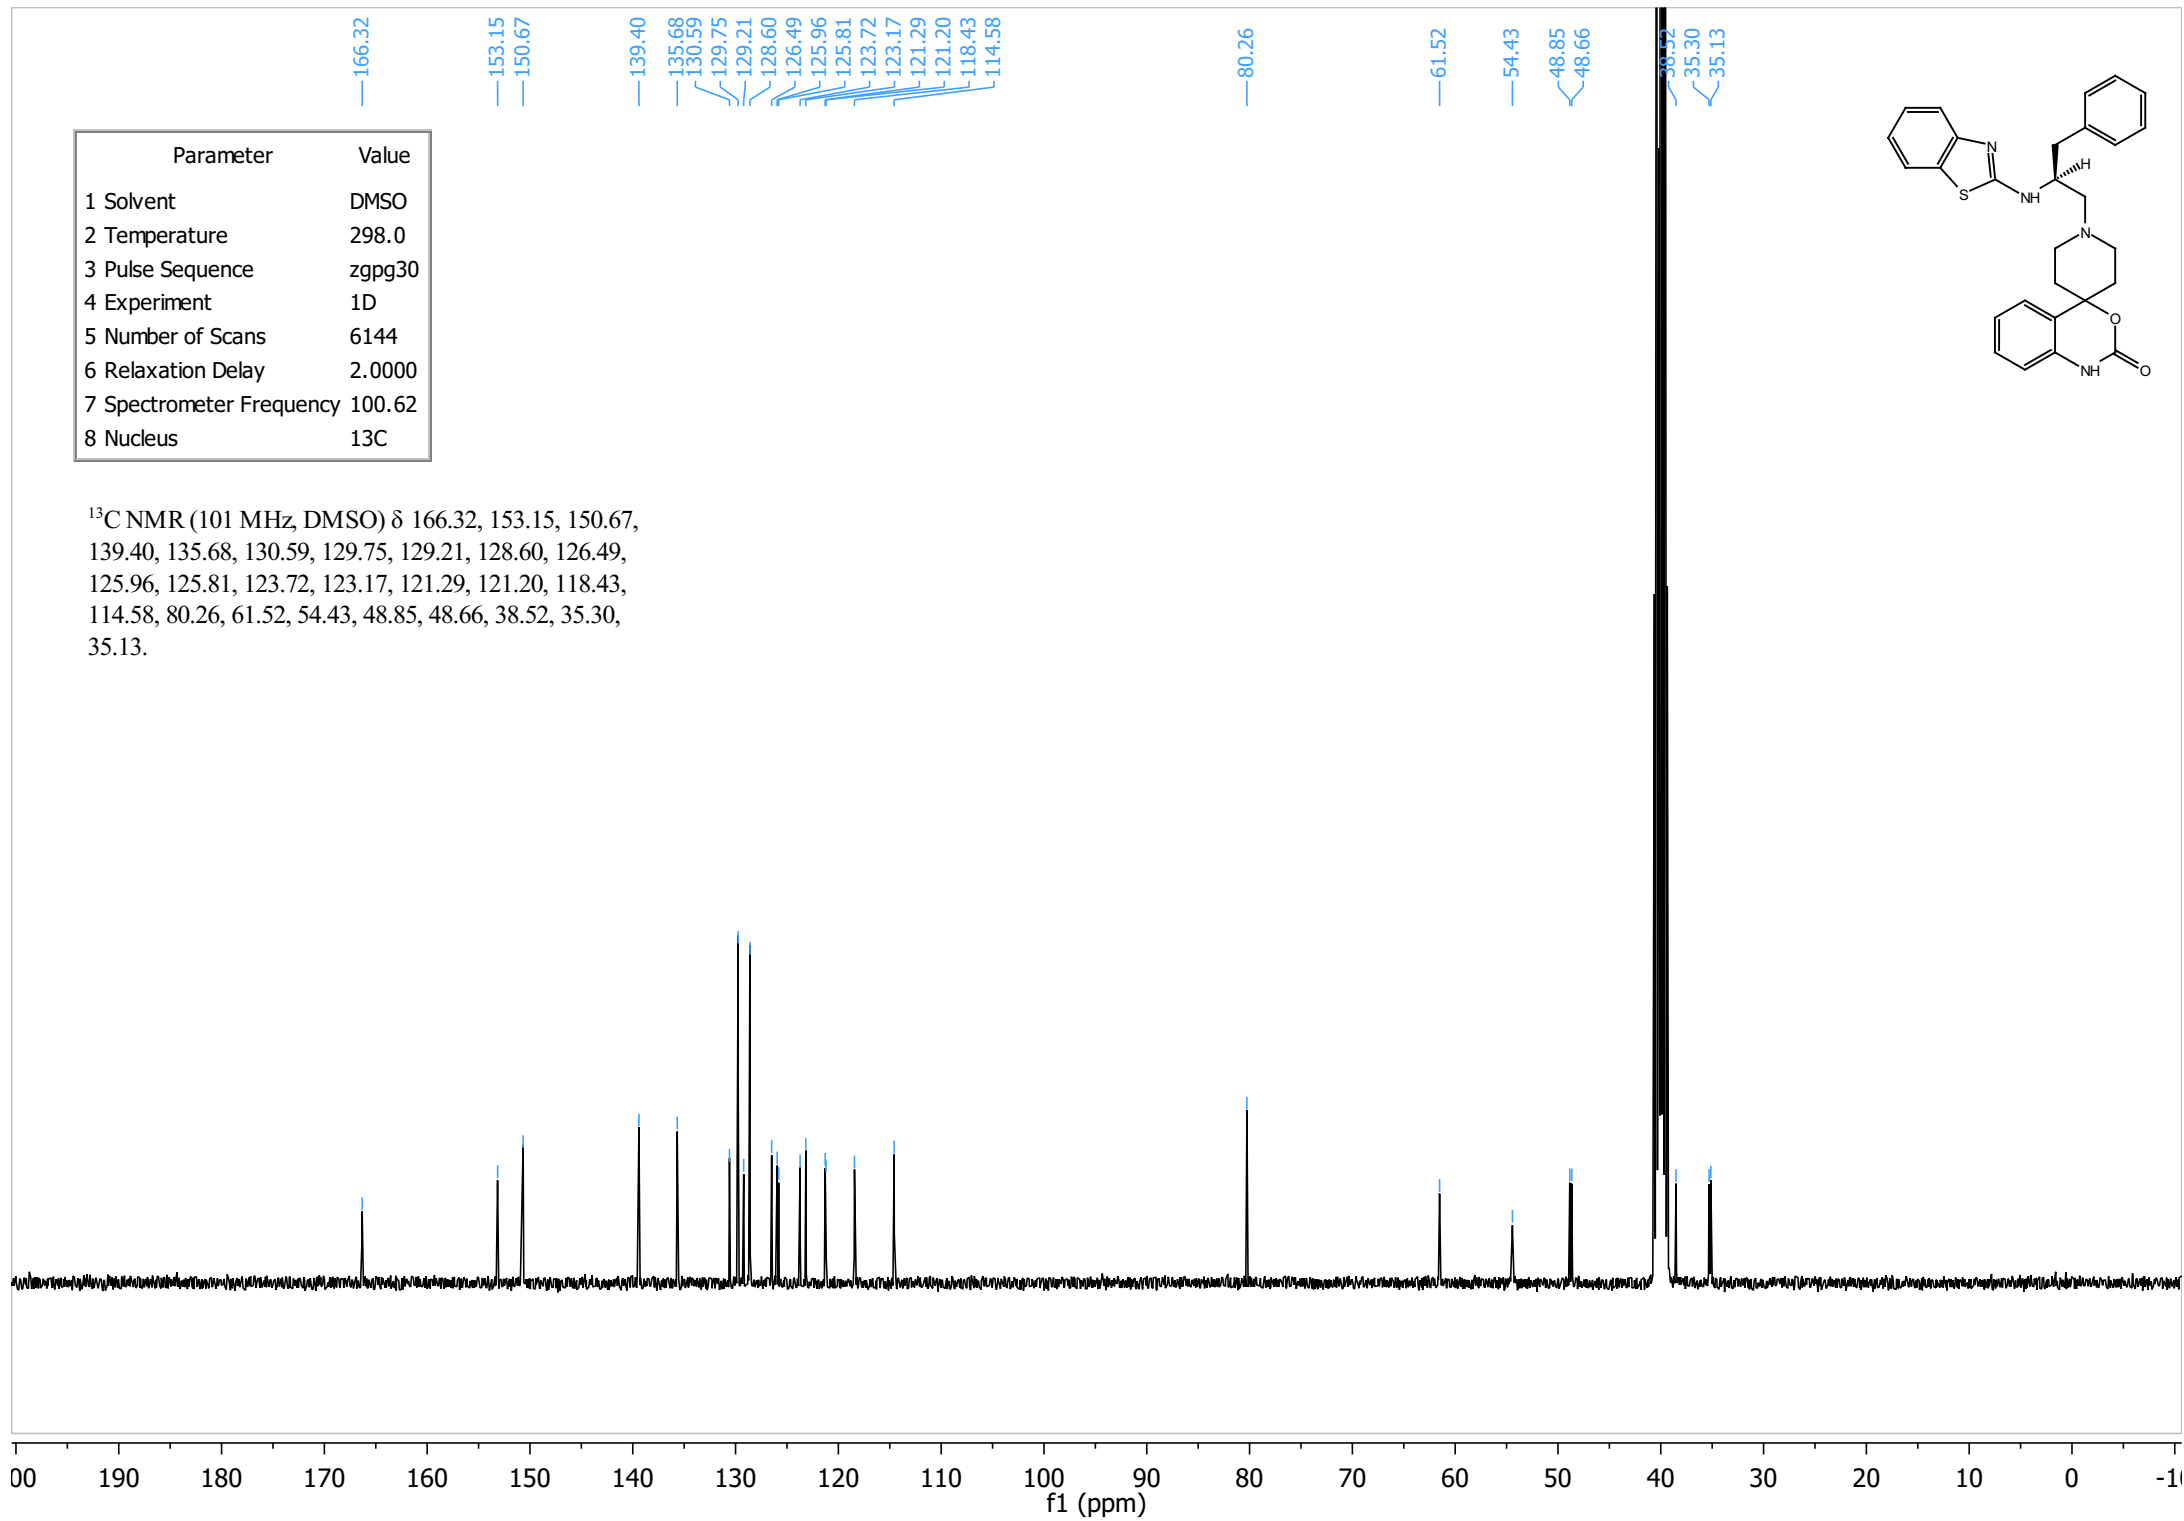



| Parameter                | Value               |
|--------------------------|---------------------|
| 1 Solvent                | DMSO                |
| 2 Temperature            | 298.0               |
| 3 Pulse Sequence         | zg30                |
| 4 Experiment             | 1D                  |
| 5 Number of Scans        | 1600                |
| 6 Relaxation Delay       | 1.0000              |
| 7 Acquisition Date       | 2017-09-09T02:43:39 |
| 8 Spectrometer Frequency | 400.14              |
| 9 Nucleus                | <sup>1</sup> H      |

<sup>1</sup>H NMR (400 MHz, DMSO-*d*<sub>6</sub>) δ 9.18 (s, 1H), 7.27 (t, *J* = 7.3 Hz, 2H), 7.20 (d, *J* = 6.9 Hz, 3H), 7.12 (t, *J* = 7.6 Hz, 1H), 6.89 (t, *J* = 7.5 Hz, 1H), 6.80 (d, *J* = 7.9 Hz, 1H), 6.61 (d, *J* = 8.5 Hz, 1H), 3.85 – 3.71 (m, 1H), 2.87 – 2.77 (m, 1H), 2.60 (d, *J* = 31.3 Hz, 3H), 2.42 – 2.25 (m, 2H), 1.86 (d, *J* = 12.1 Hz, 2H), 1.68 (d, *J* = 10.5 Hz, 2H), 1.33 (s, 9H).

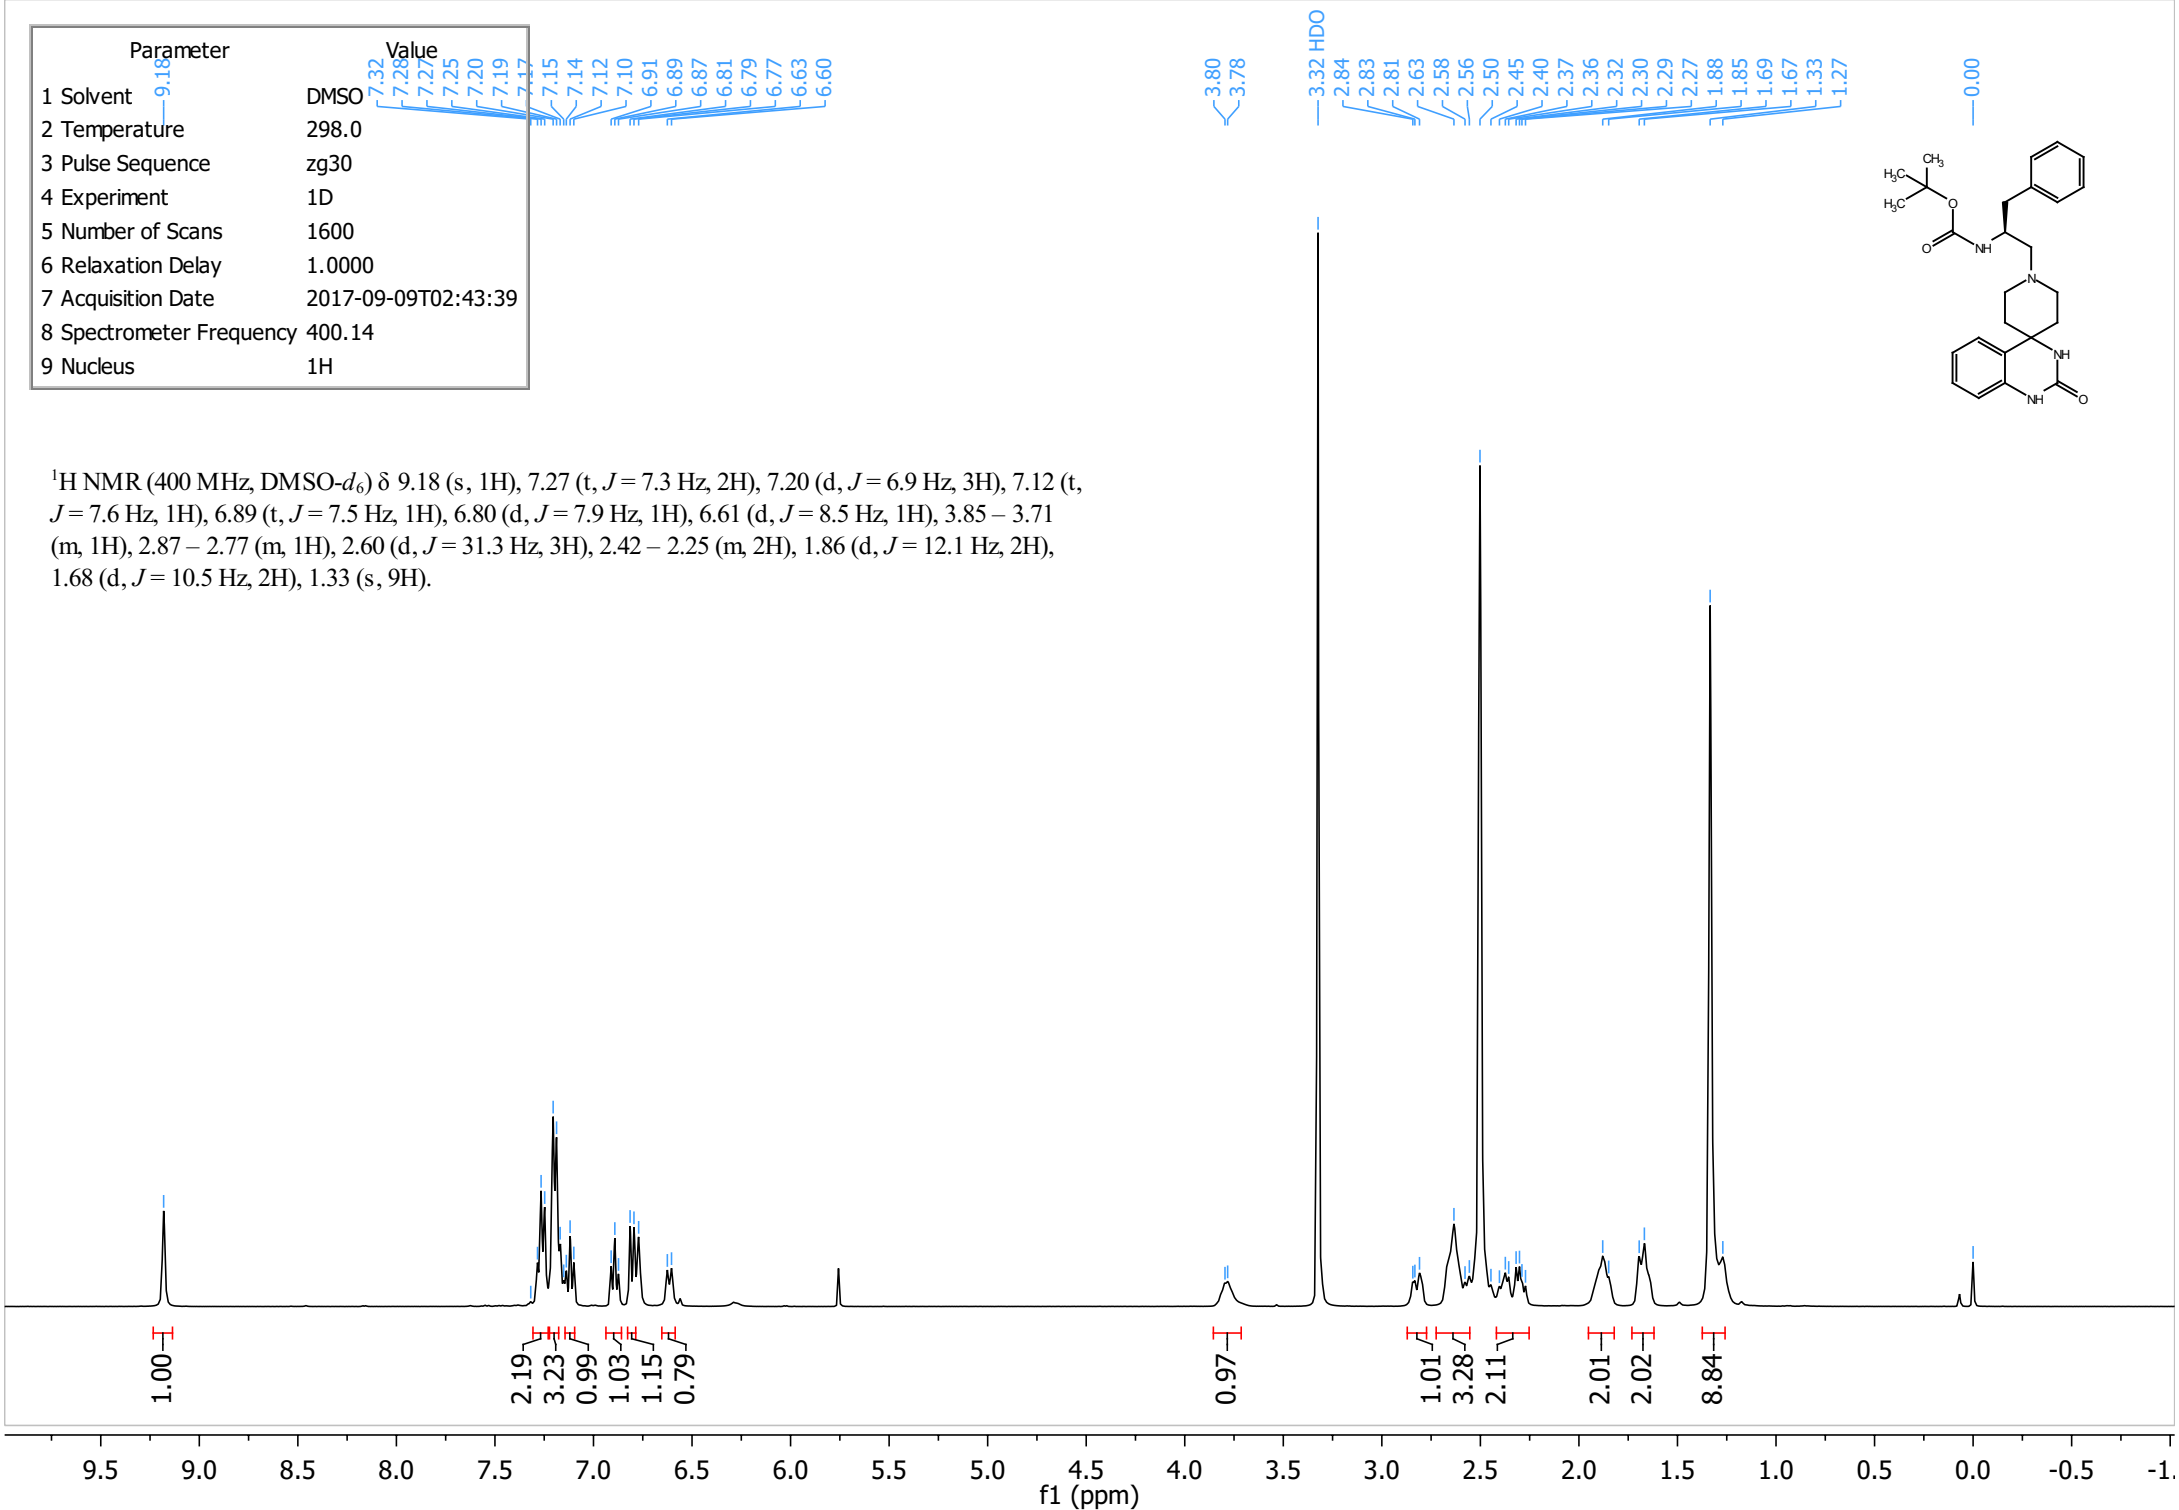

1.00

2.19

3.23

0.99

1.03

1.15

0.79

0.97

1.01

3.28

2.11

2.01

2.02

8.84

9.5 9.0 8.5 8.0 7.5 7.0 6.5 6.0 5.5 5.0 4.5 4.0 3.5 3.0 2.5 2.0 1.5 1.0 0.5 0.0 -0.5 -1.0

f1 (ppm)

| Parameter                | Value               |
|--------------------------|---------------------|
| 1 Solvent                | DMSO                |
| 2 Temperature            | 298.0               |
| 3 Pulse Sequence         | zgpg30              |
| 4 Experiment             | 1D                  |
| 5 Number of Scans        | 6144                |
| 6 Relaxation Delay       | 2.0000              |
| 7 Acquisition Date       | 2017-09-09T00:25:40 |
| 8 Spectrometer Frequency | 100.62              |
| 9 Nucleus                | <sup>13</sup> C     |

155.73  
153.67  
139.94  
137.69  
129.57  
128.47  
128.16  
127.13  
126.23  
123.90  
121.73  
114.32

77.80

62.28

54.02

49.84

48.14

47.99

39.01

37.30

28.75

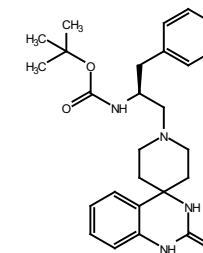

<sup>13</sup>C NMR (101 MHz, DMSO) δ 155.73, 153.67, 139.94, 137.69, 129.57, 128.47, 128.16, 127.13, 126.23, 123.90, 121.73, 114.32, 77.80, 62.28, 54.02, 49.84, 48.14, 47.99, 39.01, 37.30, 28.75.

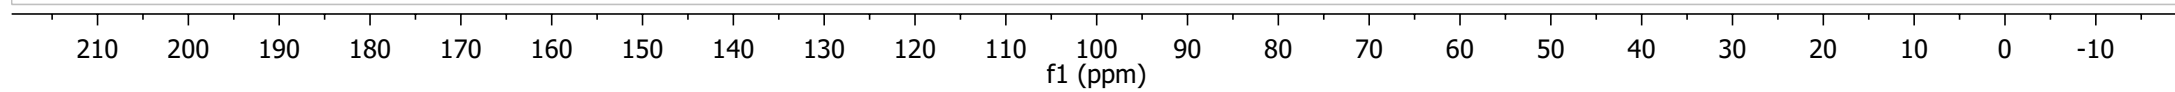

| Parameter          | Value               |
|--------------------|---------------------|
| 1 Solvent          | DMSO                |
| 2 Temperature      | 298.0               |
| 3 Pulse Sequence   | zg30                |
| 4 Experiment       | 1D                  |
| 5 Number of Scans  | 600                 |
| 6 Relaxation Delay | 1.0000              |
| 7 Acquisition Date | 2017-08-30T19:24:55 |
| 8 Spectrometer     | 400.14              |
| Frequency          |                     |
| 9 Nucleus          | <sup>1</sup> H      |

<sup>1</sup>H NMR (400 MHz, DMSO-*d*<sub>6</sub>) δ 9.12 (s, 1H), 7.18 (dt, *J* = 21.6, 7.5 Hz, 5H), 7.05 (t, *J* = 7.6 Hz, 1H), 6.82 (t, *J* = 7.5 Hz, 1H), 6.74 (d, *J* = 3.8 Hz, 2H), 3.26 (s, 2H), 3.04 (s, 1H), 2.63 – 2.49 (m, 4H), 2.36 (d, *J* = 35.4 Hz, 2H), 2.23 – 2.07 (m, 2H), 1.86 (dq, *J* = 23.8, 13.0, 10.8 Hz, 2H), 1.60 (d, *J* = 12.8 Hz, 2H), 1.44 (s, 1H).

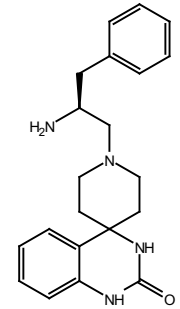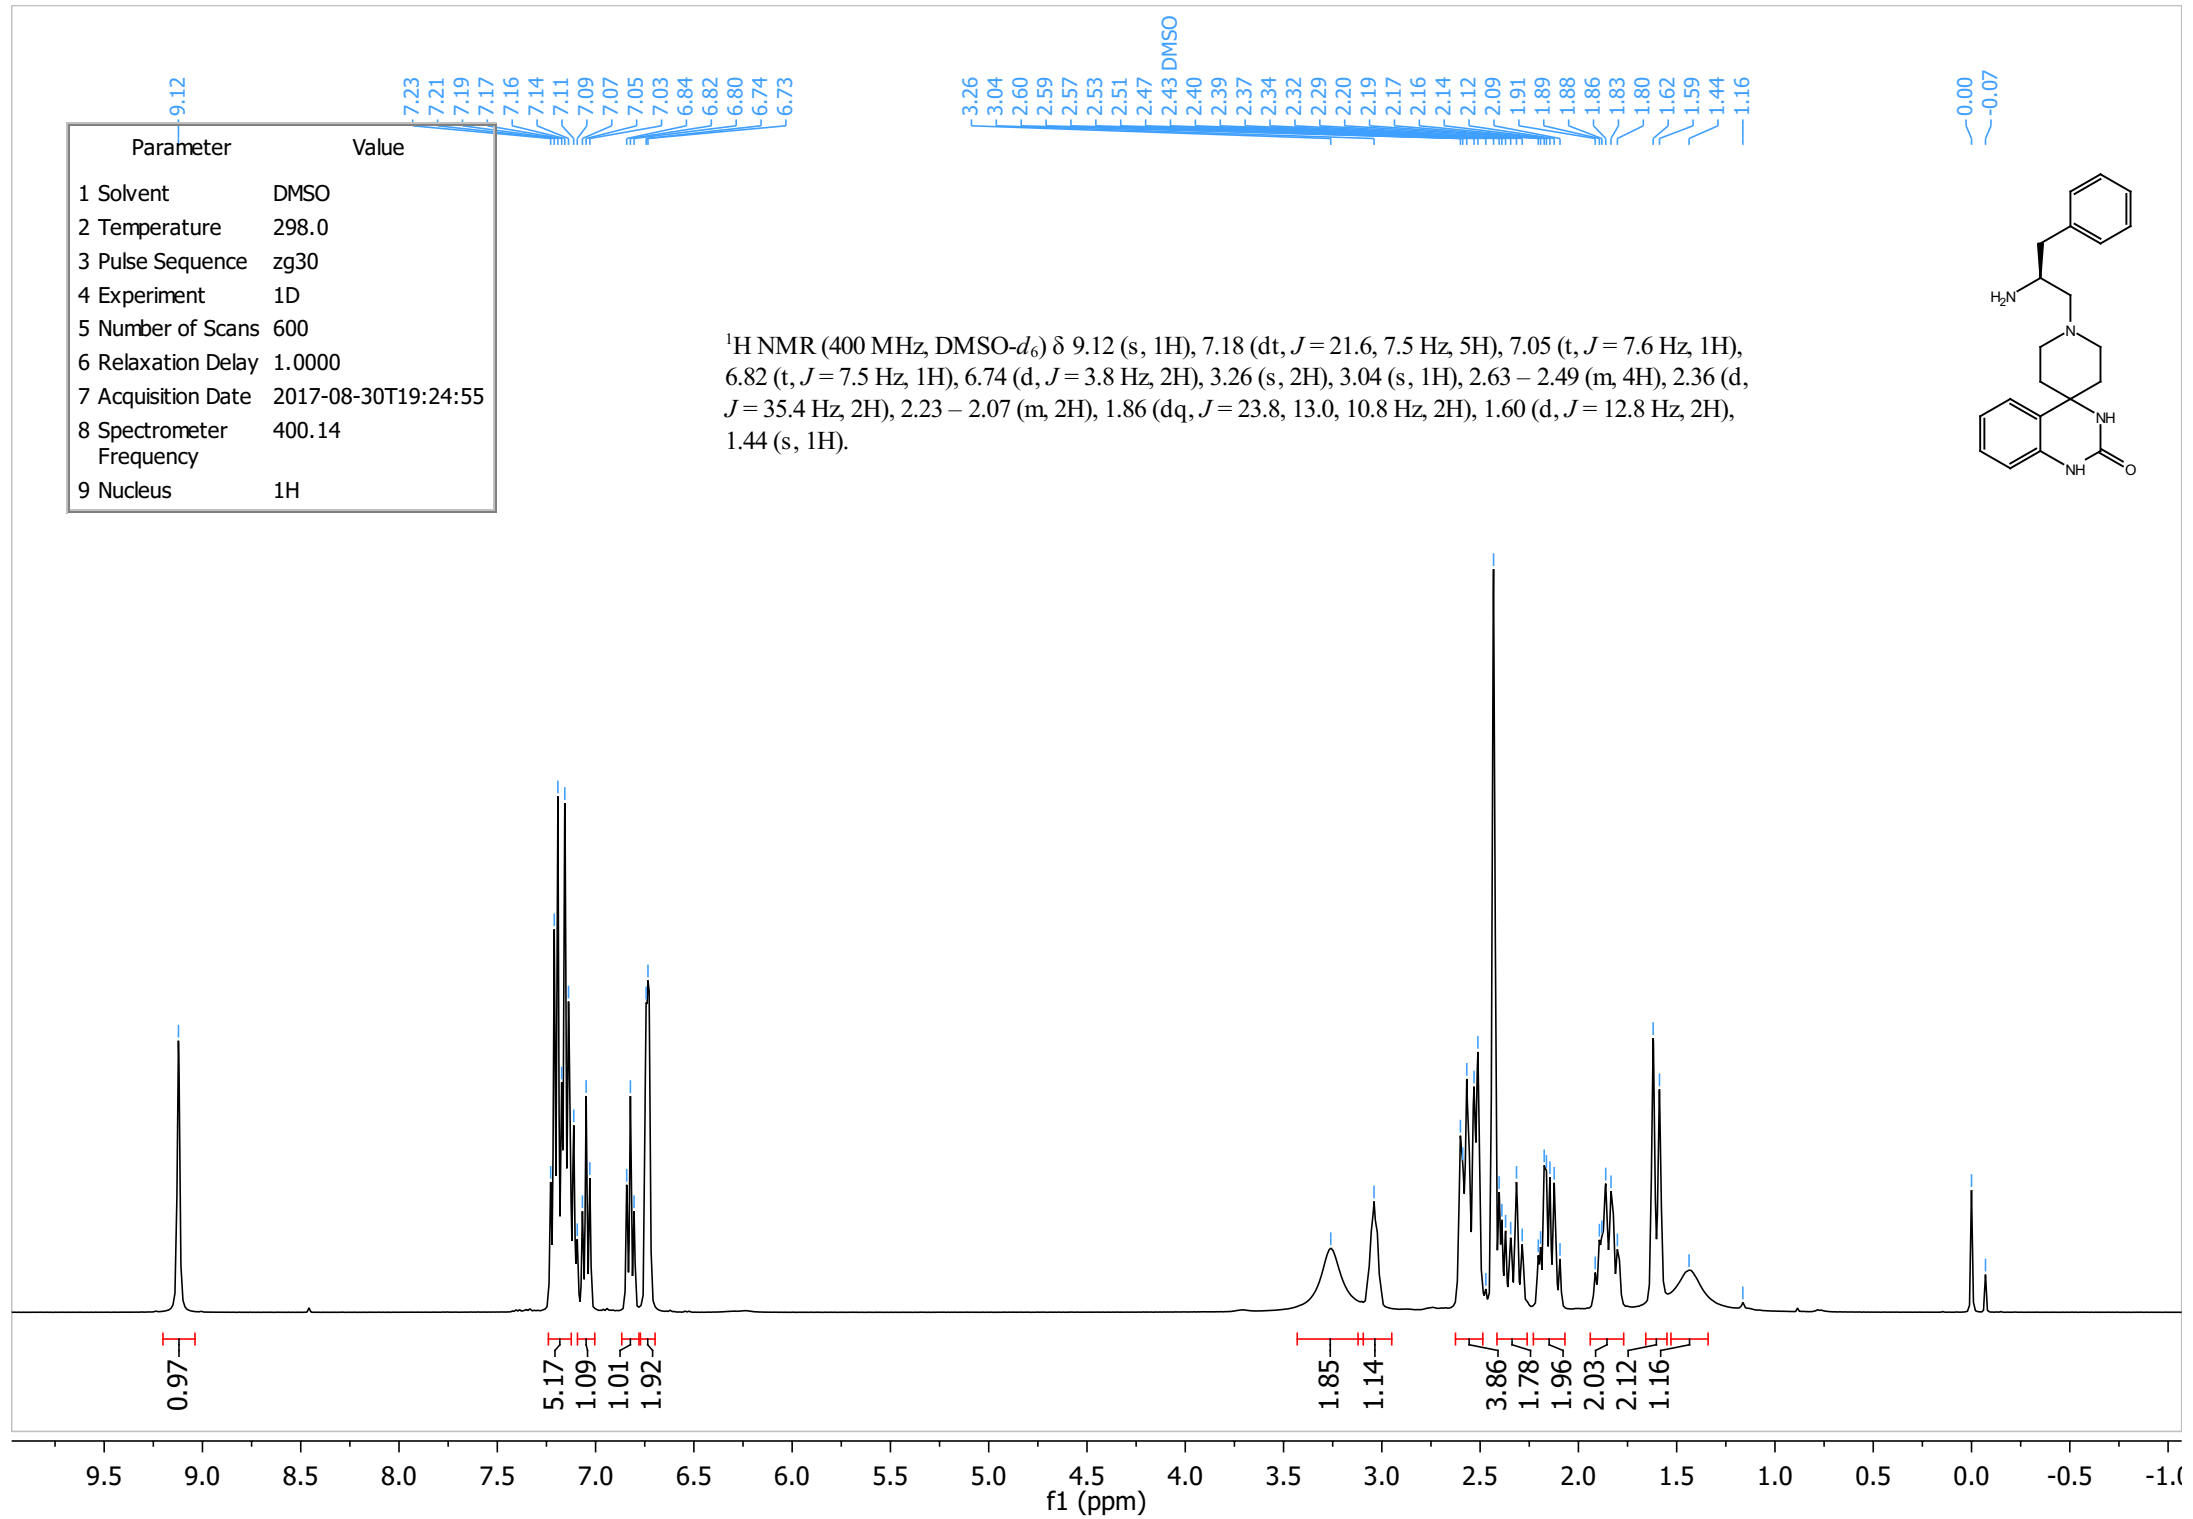

| Parameter                | Value               |
|--------------------------|---------------------|
| 1 Solvent                | DMSO                |
| 2 Temperature            | 298.0               |
| 3 Pulse Sequence         | zgpg30              |
| 4 Experiment             | 1D                  |
| 5 Number of Scans        | 1024                |
| 6 Relaxation Delay       | 2.0000              |
| 7 Acquisition Date       | 2017-08-30T20:24:59 |
| 8 Spectrometer Frequency | 100.62              |
| 9 Nucleus                | <sup>13</sup> C     |

<sup>13</sup>C NMR (101 MHz, DMSO-*d*<sub>6</sub>) δ 153.72, 140.31, 137.67, 129.70, 128.56, 128.14, 127.17, 126.23, 124.03, 121.75, 114.29, 64.99, 54.09, 49.73, 49.15, 47.41, 42.46, 37.33.

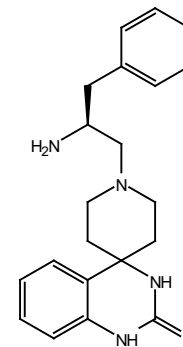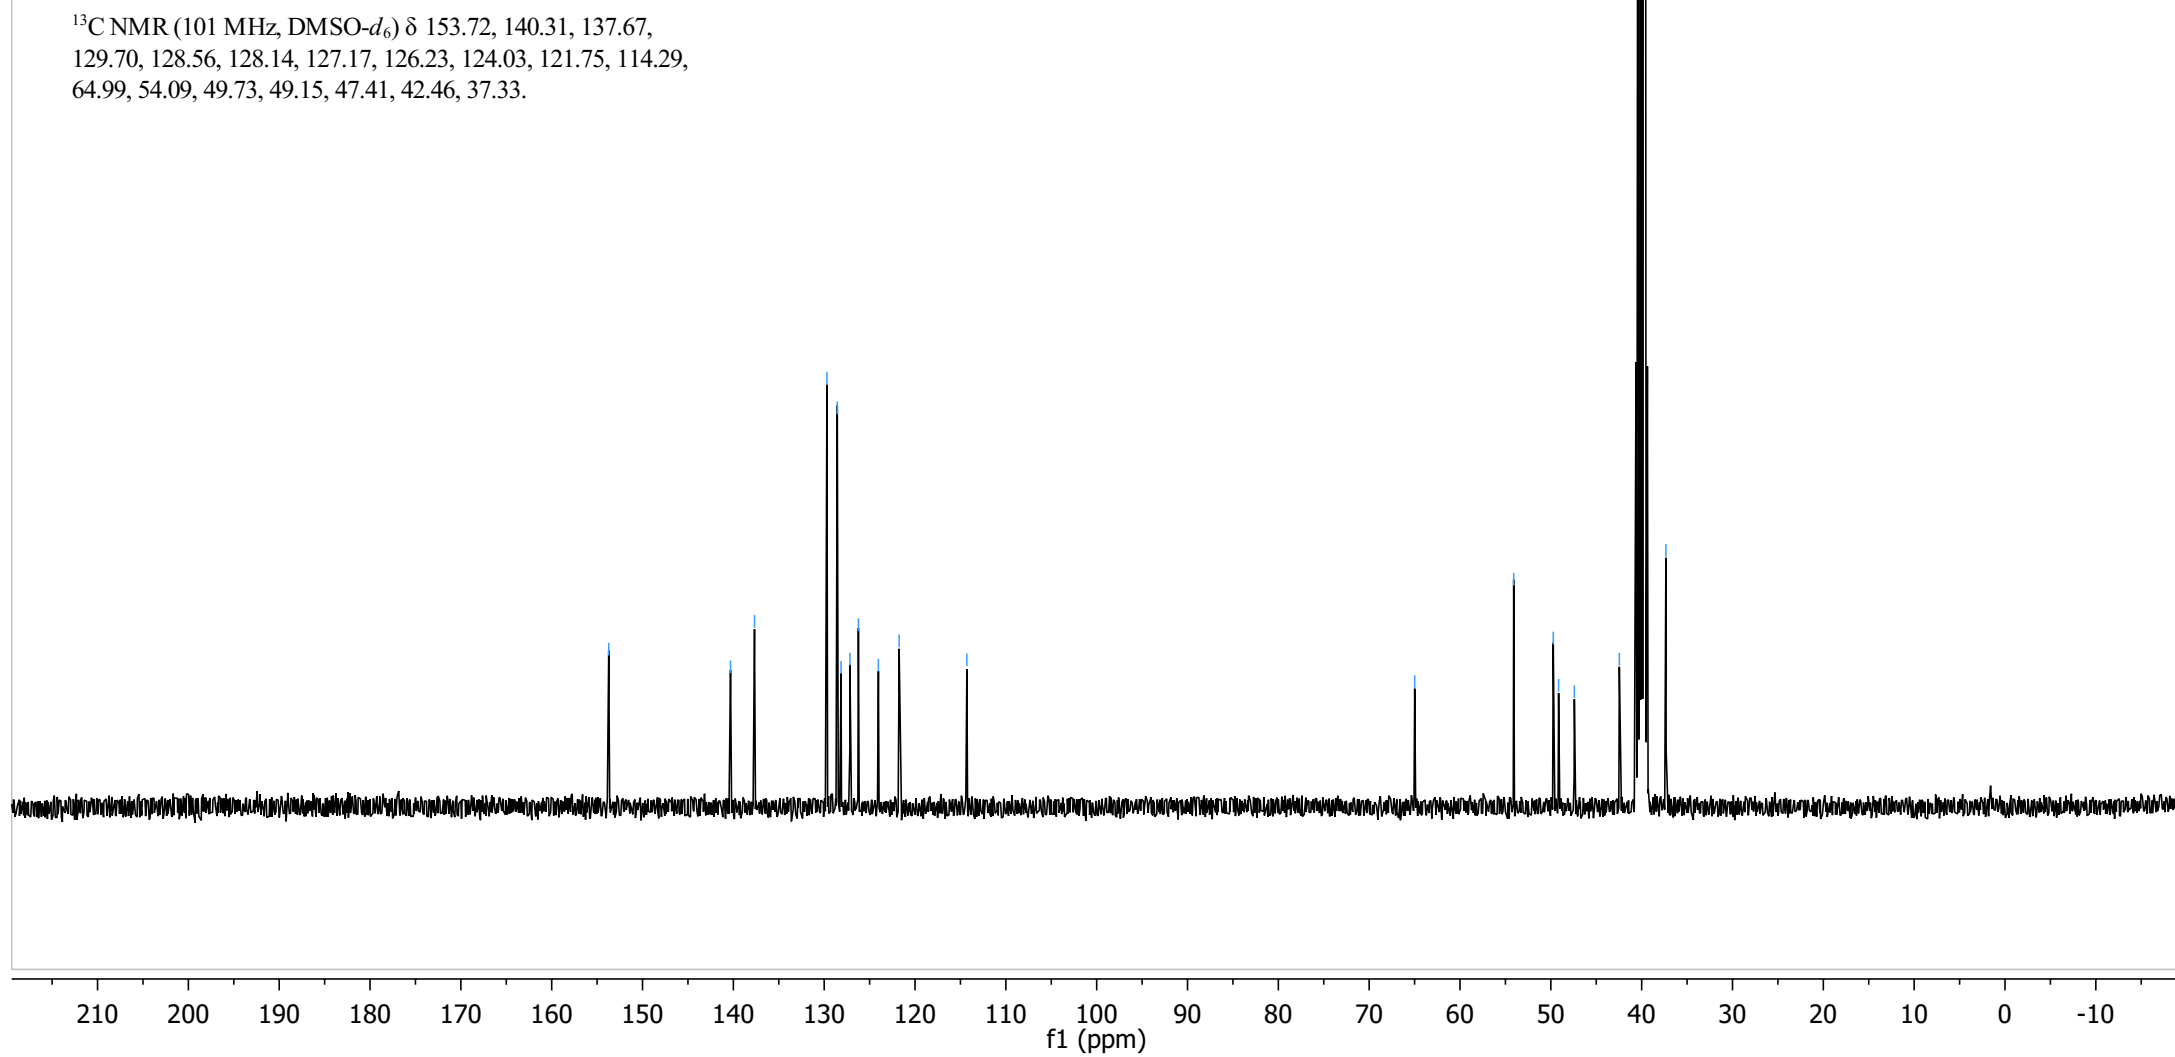

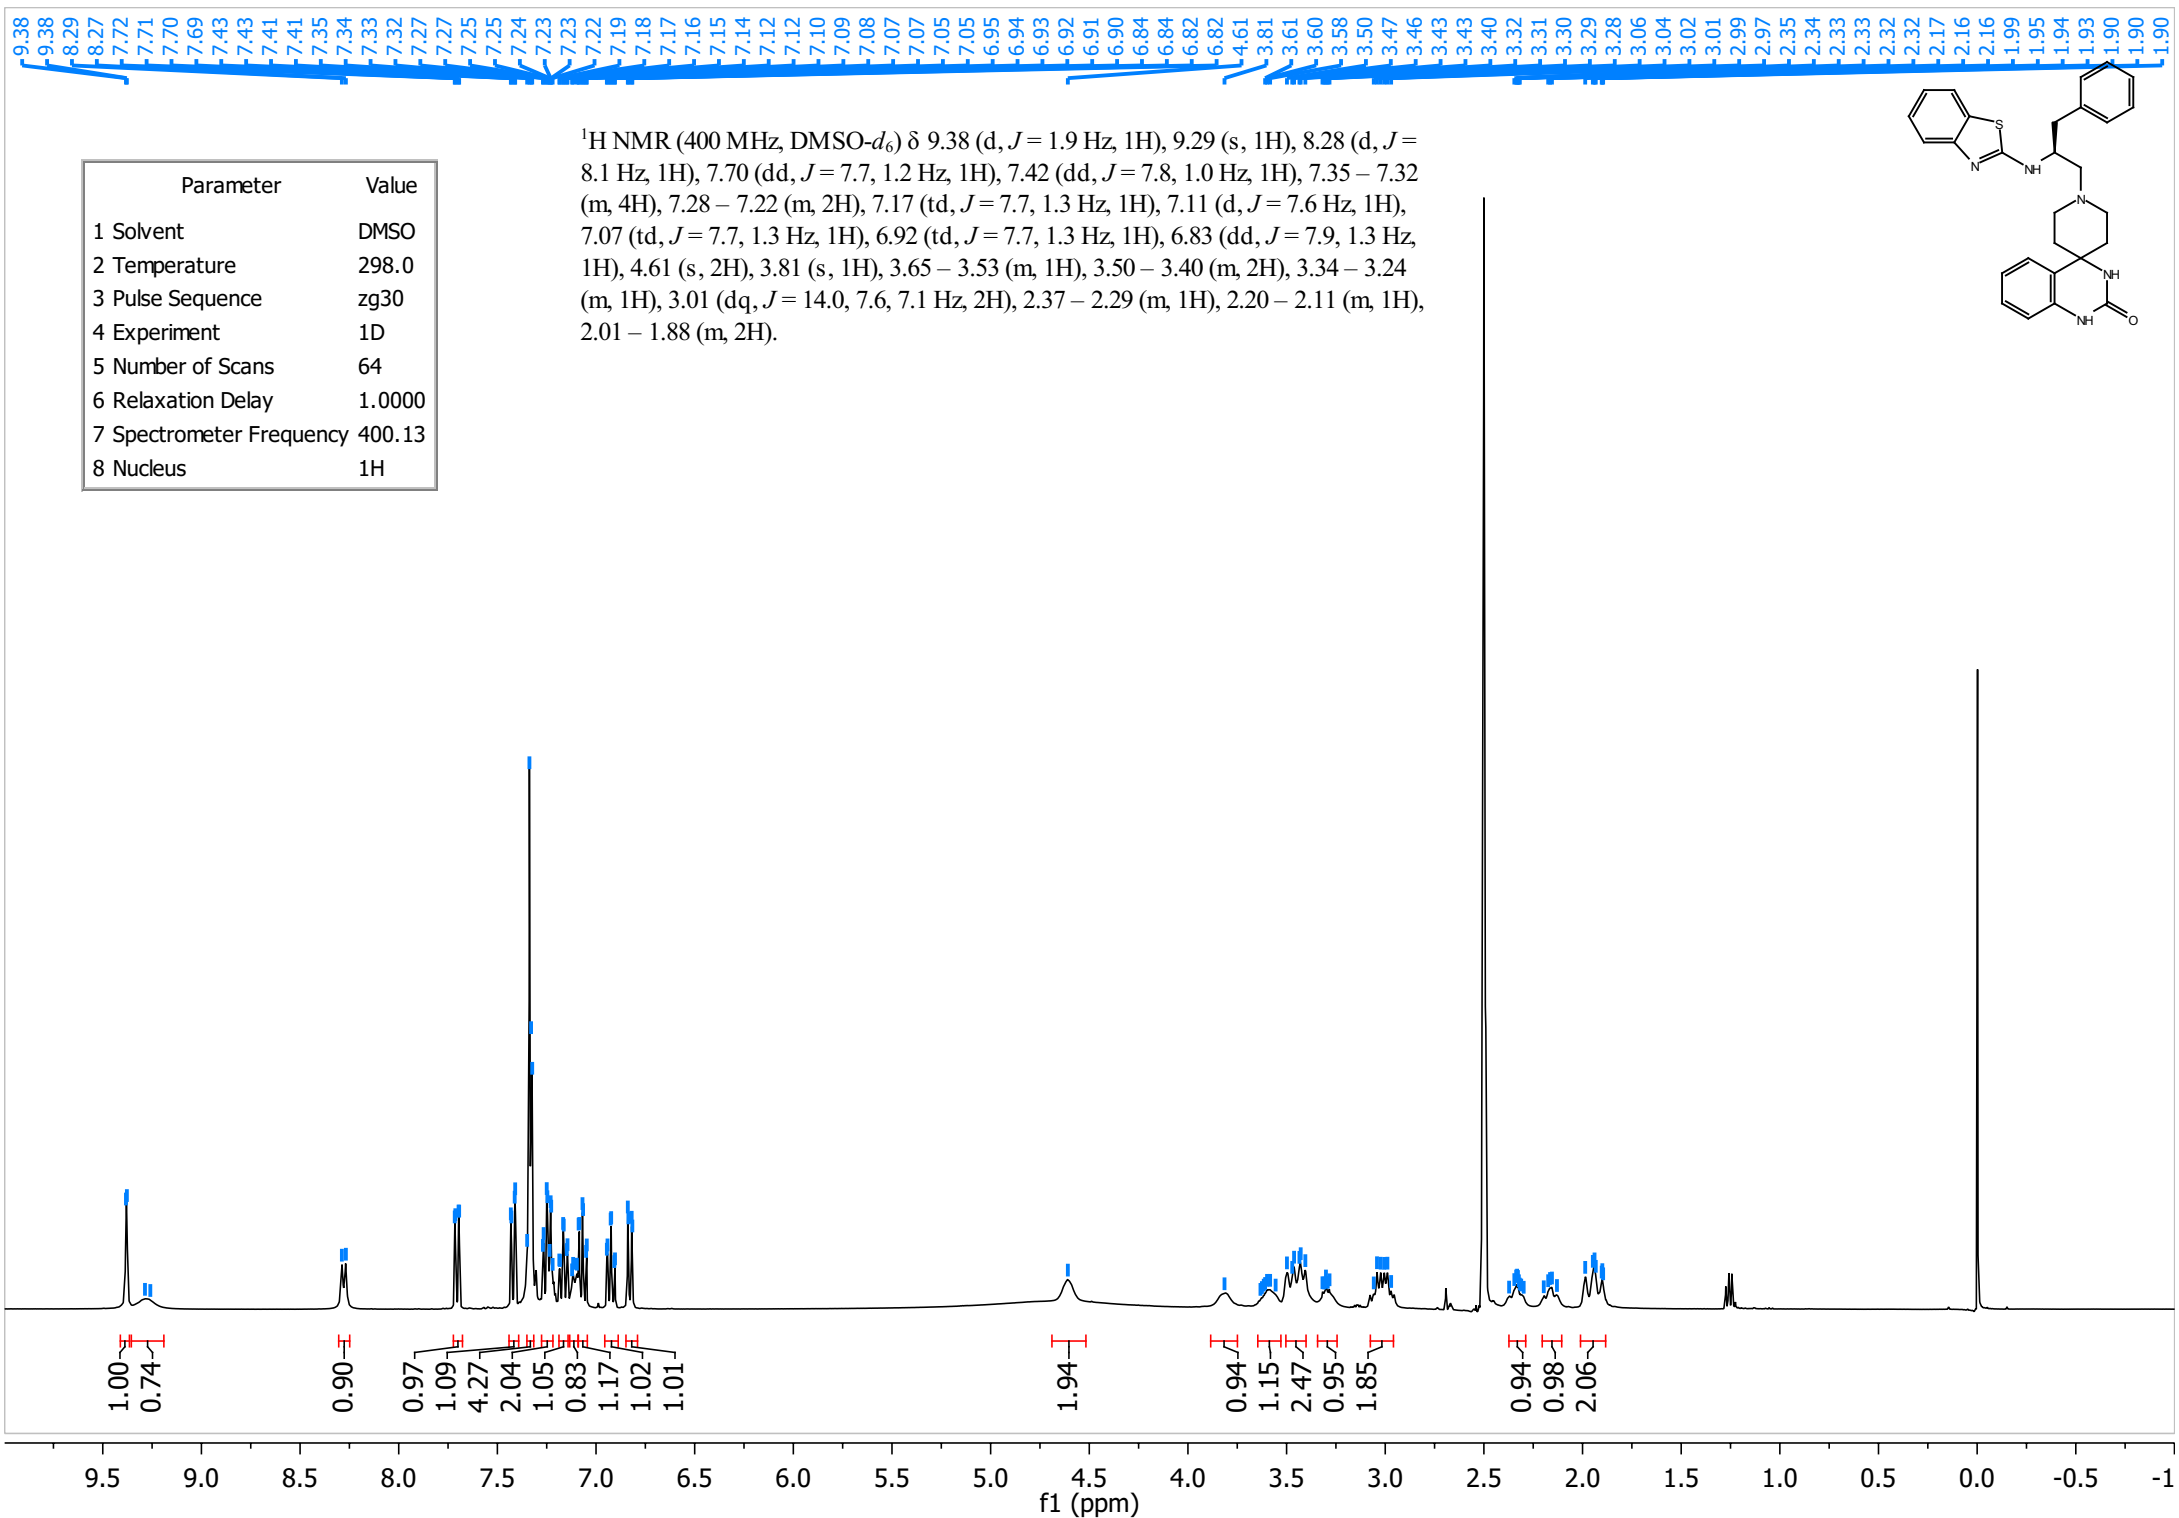

| Parameter                | Value          |
|--------------------------|----------------|
| 1 Solvent                | DMSO           |
| 2 Temperature            | 298.0          |
| 3 Pulse Sequence         | zg30           |
| 4 Experiment             | 1D             |
| 5 Number of Scans        | 64             |
| 6 Relaxation Delay       | 1.0000         |
| 7 Spectrometer Frequency | 400.13         |
| 8 Nucleus                | <sup>1</sup> H |

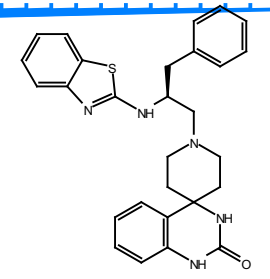

Integration values (from left to right): 1.00, 0.74, 0.90, 0.97, 1.09, 4.27, 2.04, 1.05, 0.83, 1.17, 1.02, 1.01, 1.94, 0.94, 1.15, 2.47, 0.95, 1.85, 0.94, 0.98, 2.06

| Parameter                | Value           |
|--------------------------|-----------------|
| 1 Solvent                | DMSO            |
| 2 Temperature            | 298.0           |
| 3 Pulse Sequence         | zgpg30          |
| 4 Experiment             | 1D              |
| 5 Number of Scans        | 1024            |
| 6 Relaxation Delay       | 2.0000          |
| 7 Spectrometer Frequency | 100.61          |
| 8 Nucleus                | <sup>13</sup> C |

166.32  
 158.73  
 158.39  
 153.05  
 152.25  
 137.64  
 137.34  
 130.81  
 129.69  
 128.98  
 128.94  
 127.17  
 126.21  
 124.40  
 124.08  
 122.04  
 121.61  
 118.82  
 114.68  
 52.61  
 51.64  
 48.95  
 47.35  
 38.46  
 35.15

<sup>13</sup>C NMR (101 MHz, DMSO-*d*<sub>6</sub>) δ 166.32, 158.73, 158.39, 153.05, 152.25, 137.64, 137.34, 130.81, 129.69, 128.98, 128.94, 127.17, 126.21, 124.40, 124.08, 122.04, 121.61, 118.82, 114.68, 52.61, 51.64, 48.95, 47.35, 38.46, 35.15.

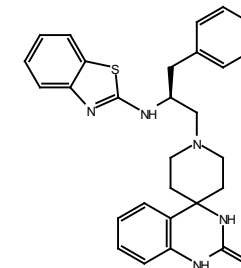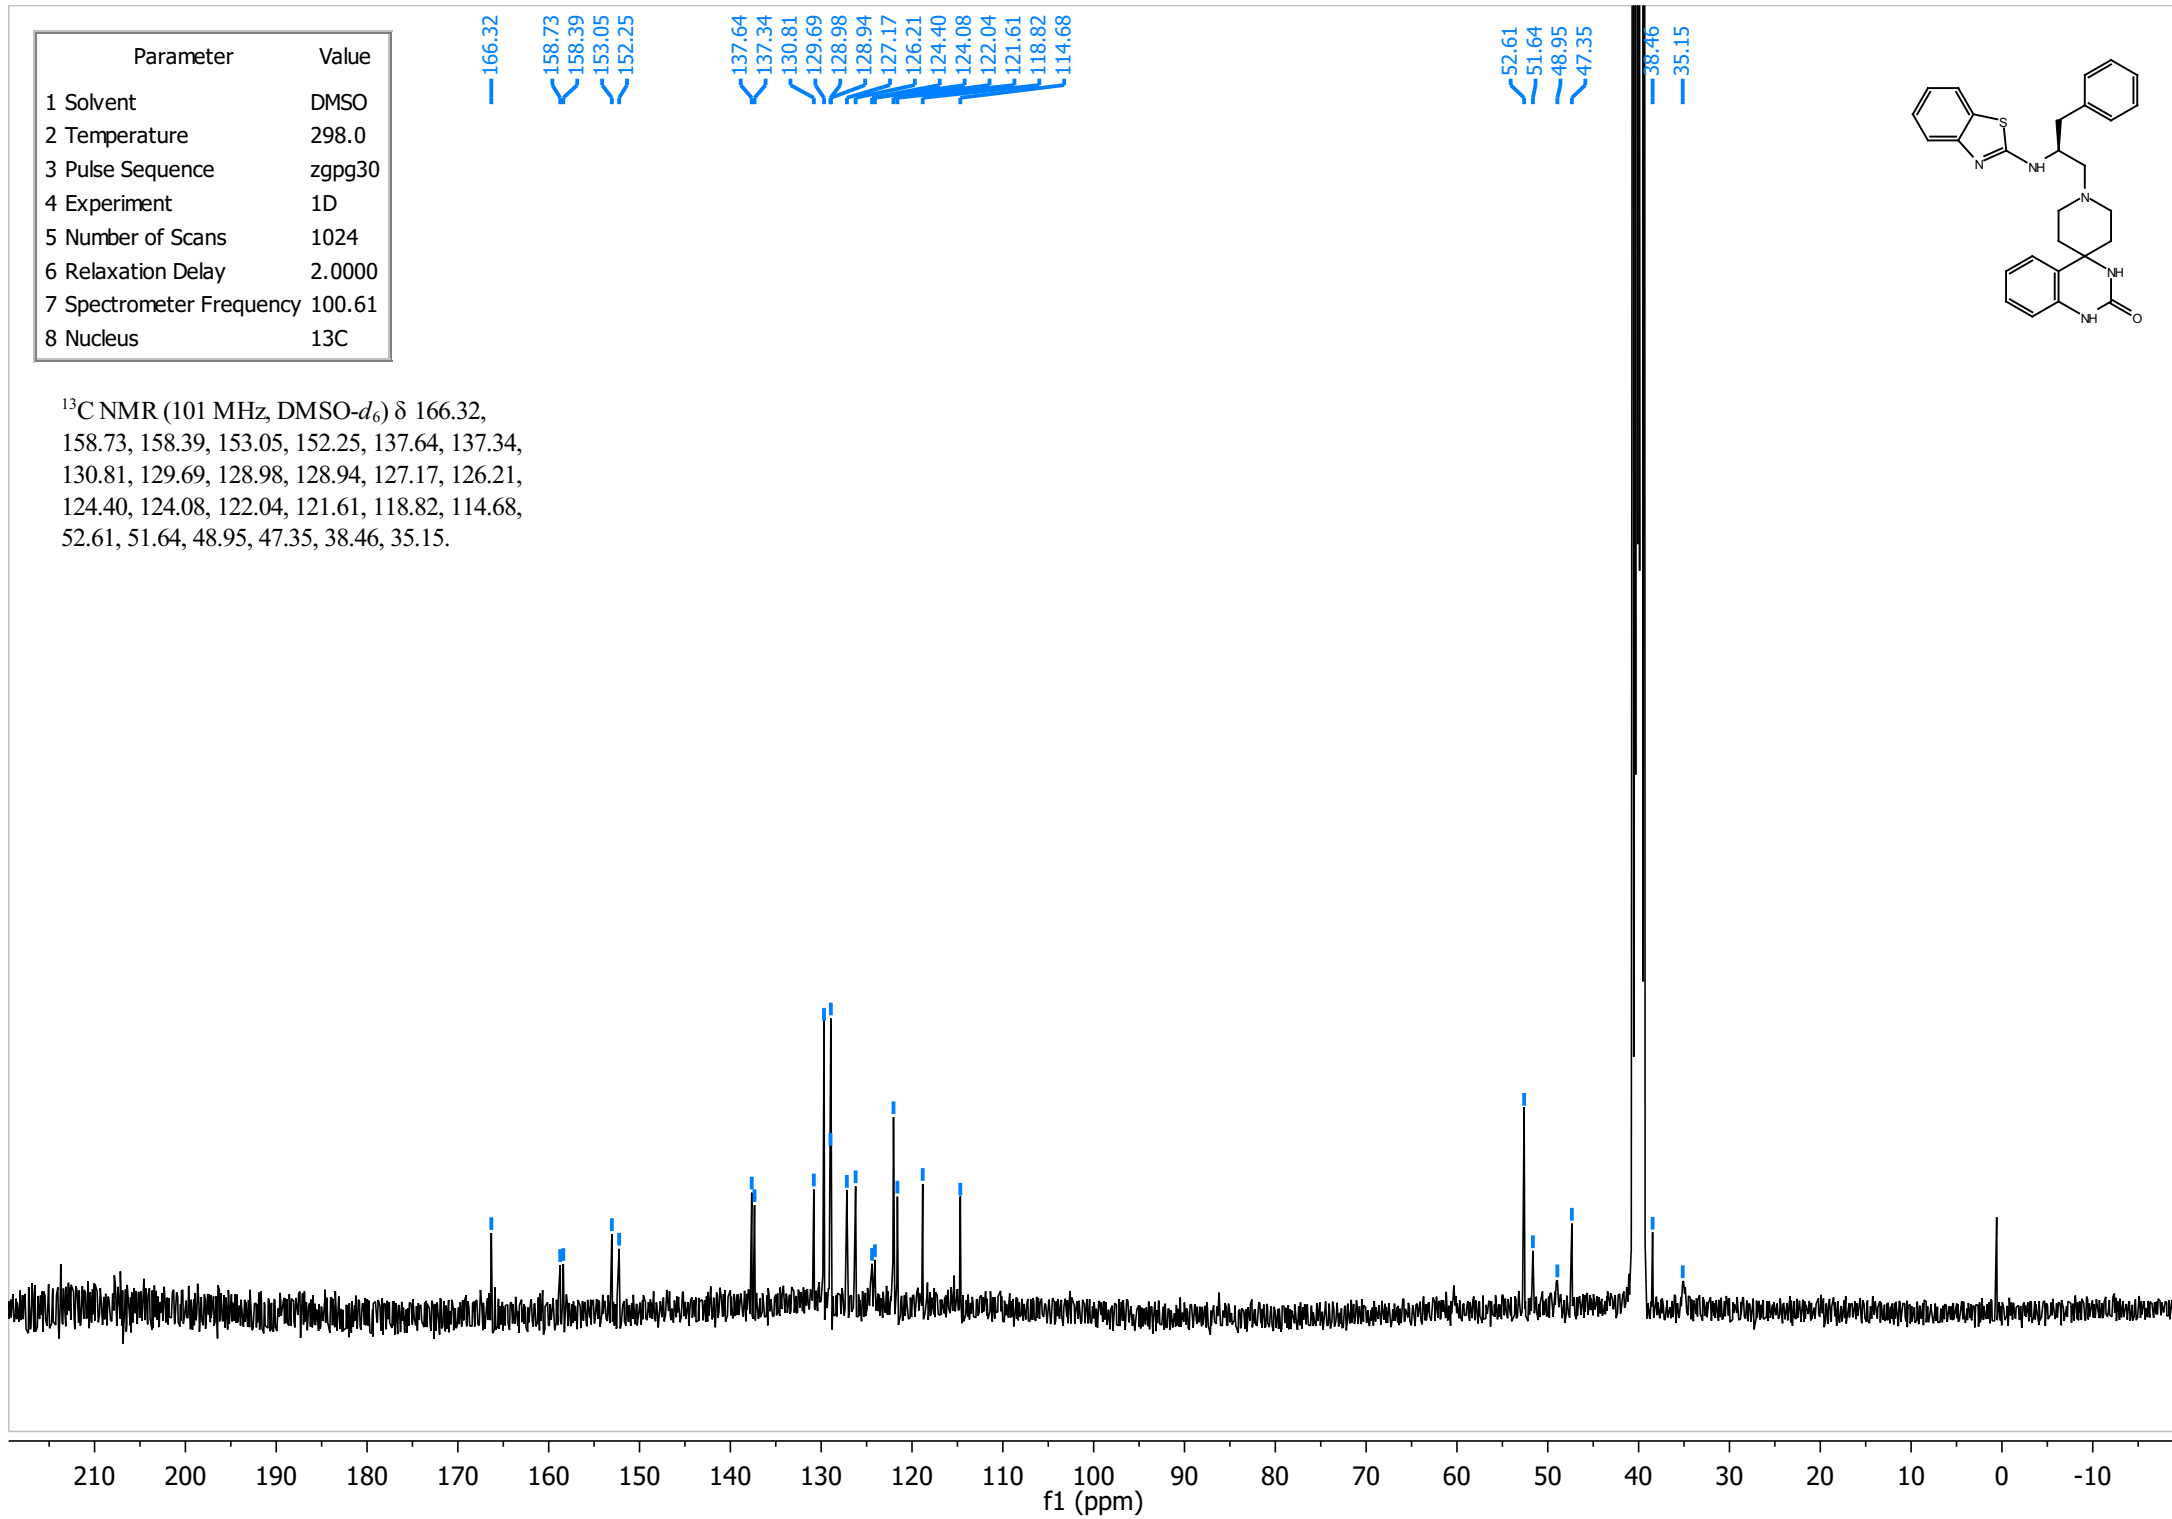

| Parameter                | Value          |
|--------------------------|----------------|
| 1 Solvent                | DMSO           |
| 2 Temperature            | 298.0          |
| 3 Pulse Sequence         | zg30           |
| 4 Experiment             | 1D             |
| 5 Number of Scans        | 64             |
| 6 Relaxation Delay       | 1.0000         |
| 7 Spectrometer Frequency | 400.13         |
| 8 Nucleus                | <sup>1</sup> H |

<sup>1</sup>H NMR (400 MHz, DMSO-*d*<sub>6</sub>) δ 9.16 (s, 1H), 7.90 (d, *J* = 8.2 Hz, 1H), 7.58 (dd, *J* = 8.8, 2.8 Hz, 1H), 7.34 (dd, *J* = 8.8, 4.9 Hz, 1H), 7.27 (d, *J* = 5.1 Hz, 4H), 7.17 (ddd, *J* = 9.0, 5.7, 3.5 Hz, 1H), 7.09 (dd, *J* = 13.6, 7.3 Hz, 2H), 7.05 – 6.99 (m, 1H), 6.84 (t, *J* = 7.6 Hz, 1H), 6.80 – 6.76 (m, 2H), 4.20 (q, *J* = 7.3 Hz, 1H), 3.00 (dd, *J* = 13.7, 5.3 Hz, 1H), 2.84 (dd, *J* = 13.7, 7.3 Hz, 1H), 2.76 – 2.60 (m, 3H), 2.61 – 2.52 (m, 2H), 2.45 (d, *J* = 1.5 Hz, 1H), 1.89 – 1.80 (m, 2H), 1.65 (t, *J* = 15.6 Hz, 2H).

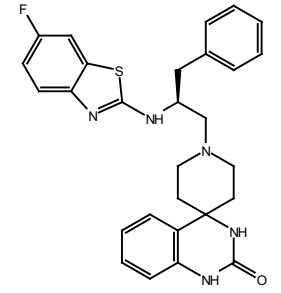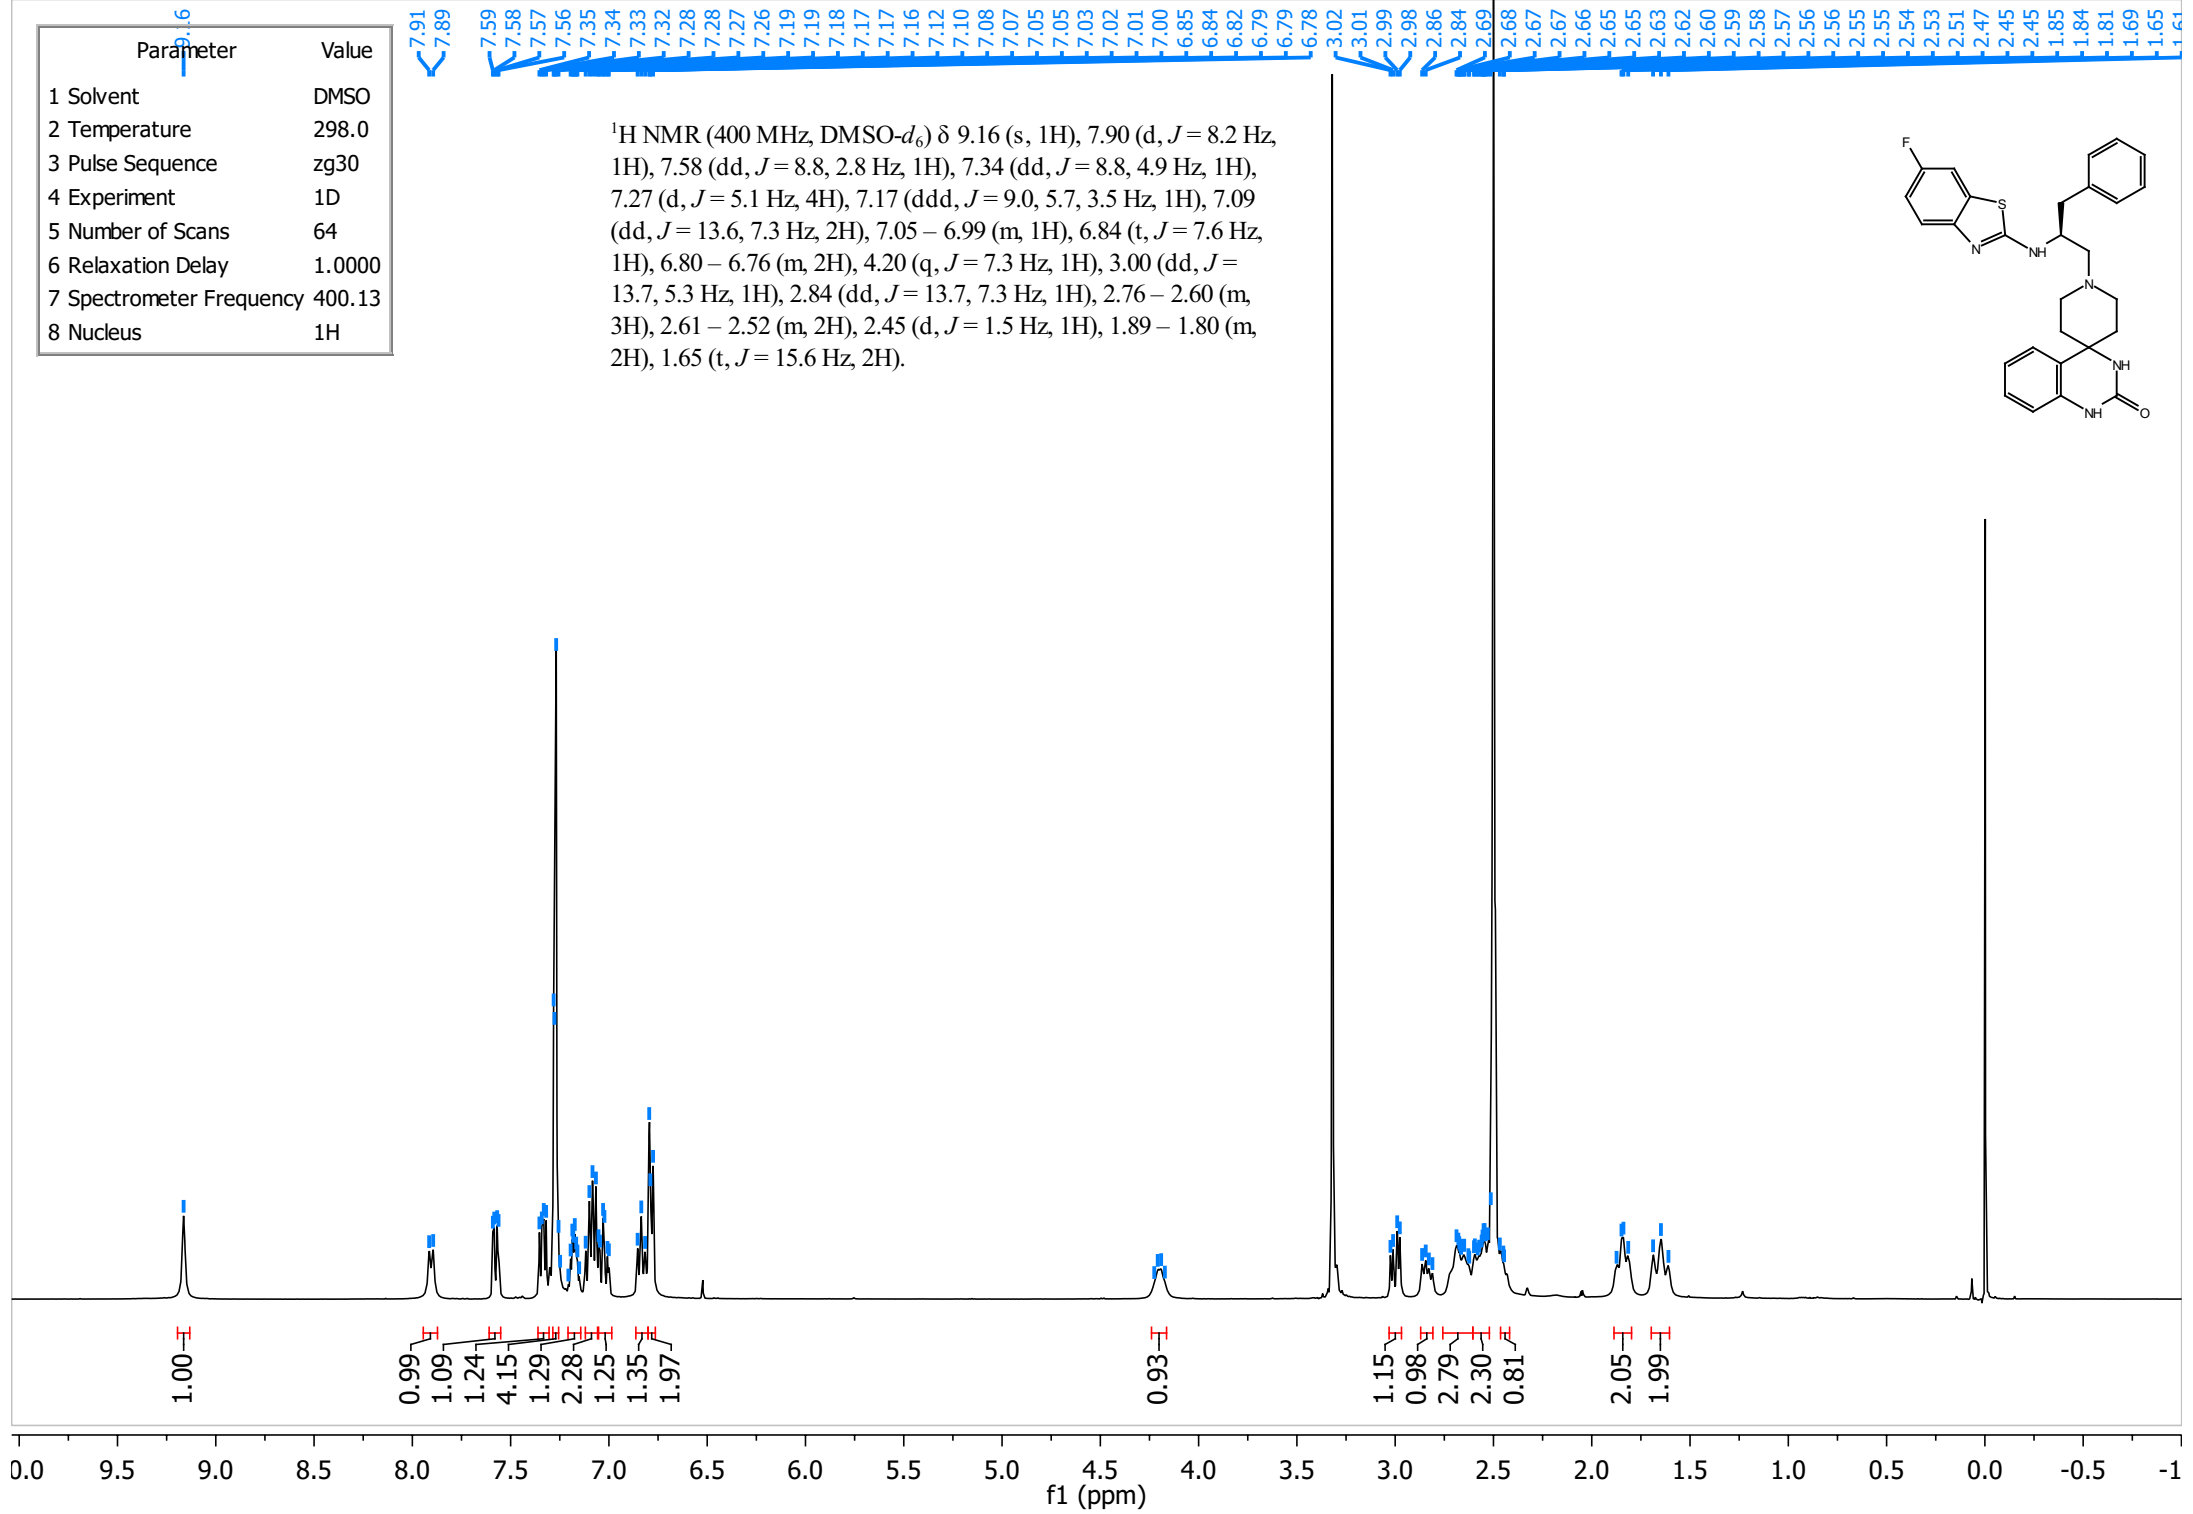

| Parameter                | Value           |
|--------------------------|-----------------|
| 1 Solvent                | DMSO            |
| 2 Temperature            | 298.0           |
| 3 Pulse Sequence         | zgpg30          |
| 4 Experiment             | 1D              |
| 5 Number of Scans        | 1024            |
| 6 Relaxation Delay       | 2.0000          |
| 7 Spectrometer Frequency | 100.61          |
| 8 Nucleus                | <sup>13</sup> C |

<sup>13</sup>C NMR (101 MHz, DMSO-*d*<sub>6</sub>) δ 166.32, 153.63, 149.82, 139.44, 137.63, 131.70, 129.73, 128.61, 128.15, 127.04, 126.49, 123.98, 121.68, 118.85, 118.76, 114.29, 113.33, 113.09, 108.38, 108.11, 61.35, 54.41, 53.97, 48.21, 48.11, 38.46, 37.44, 37.20.

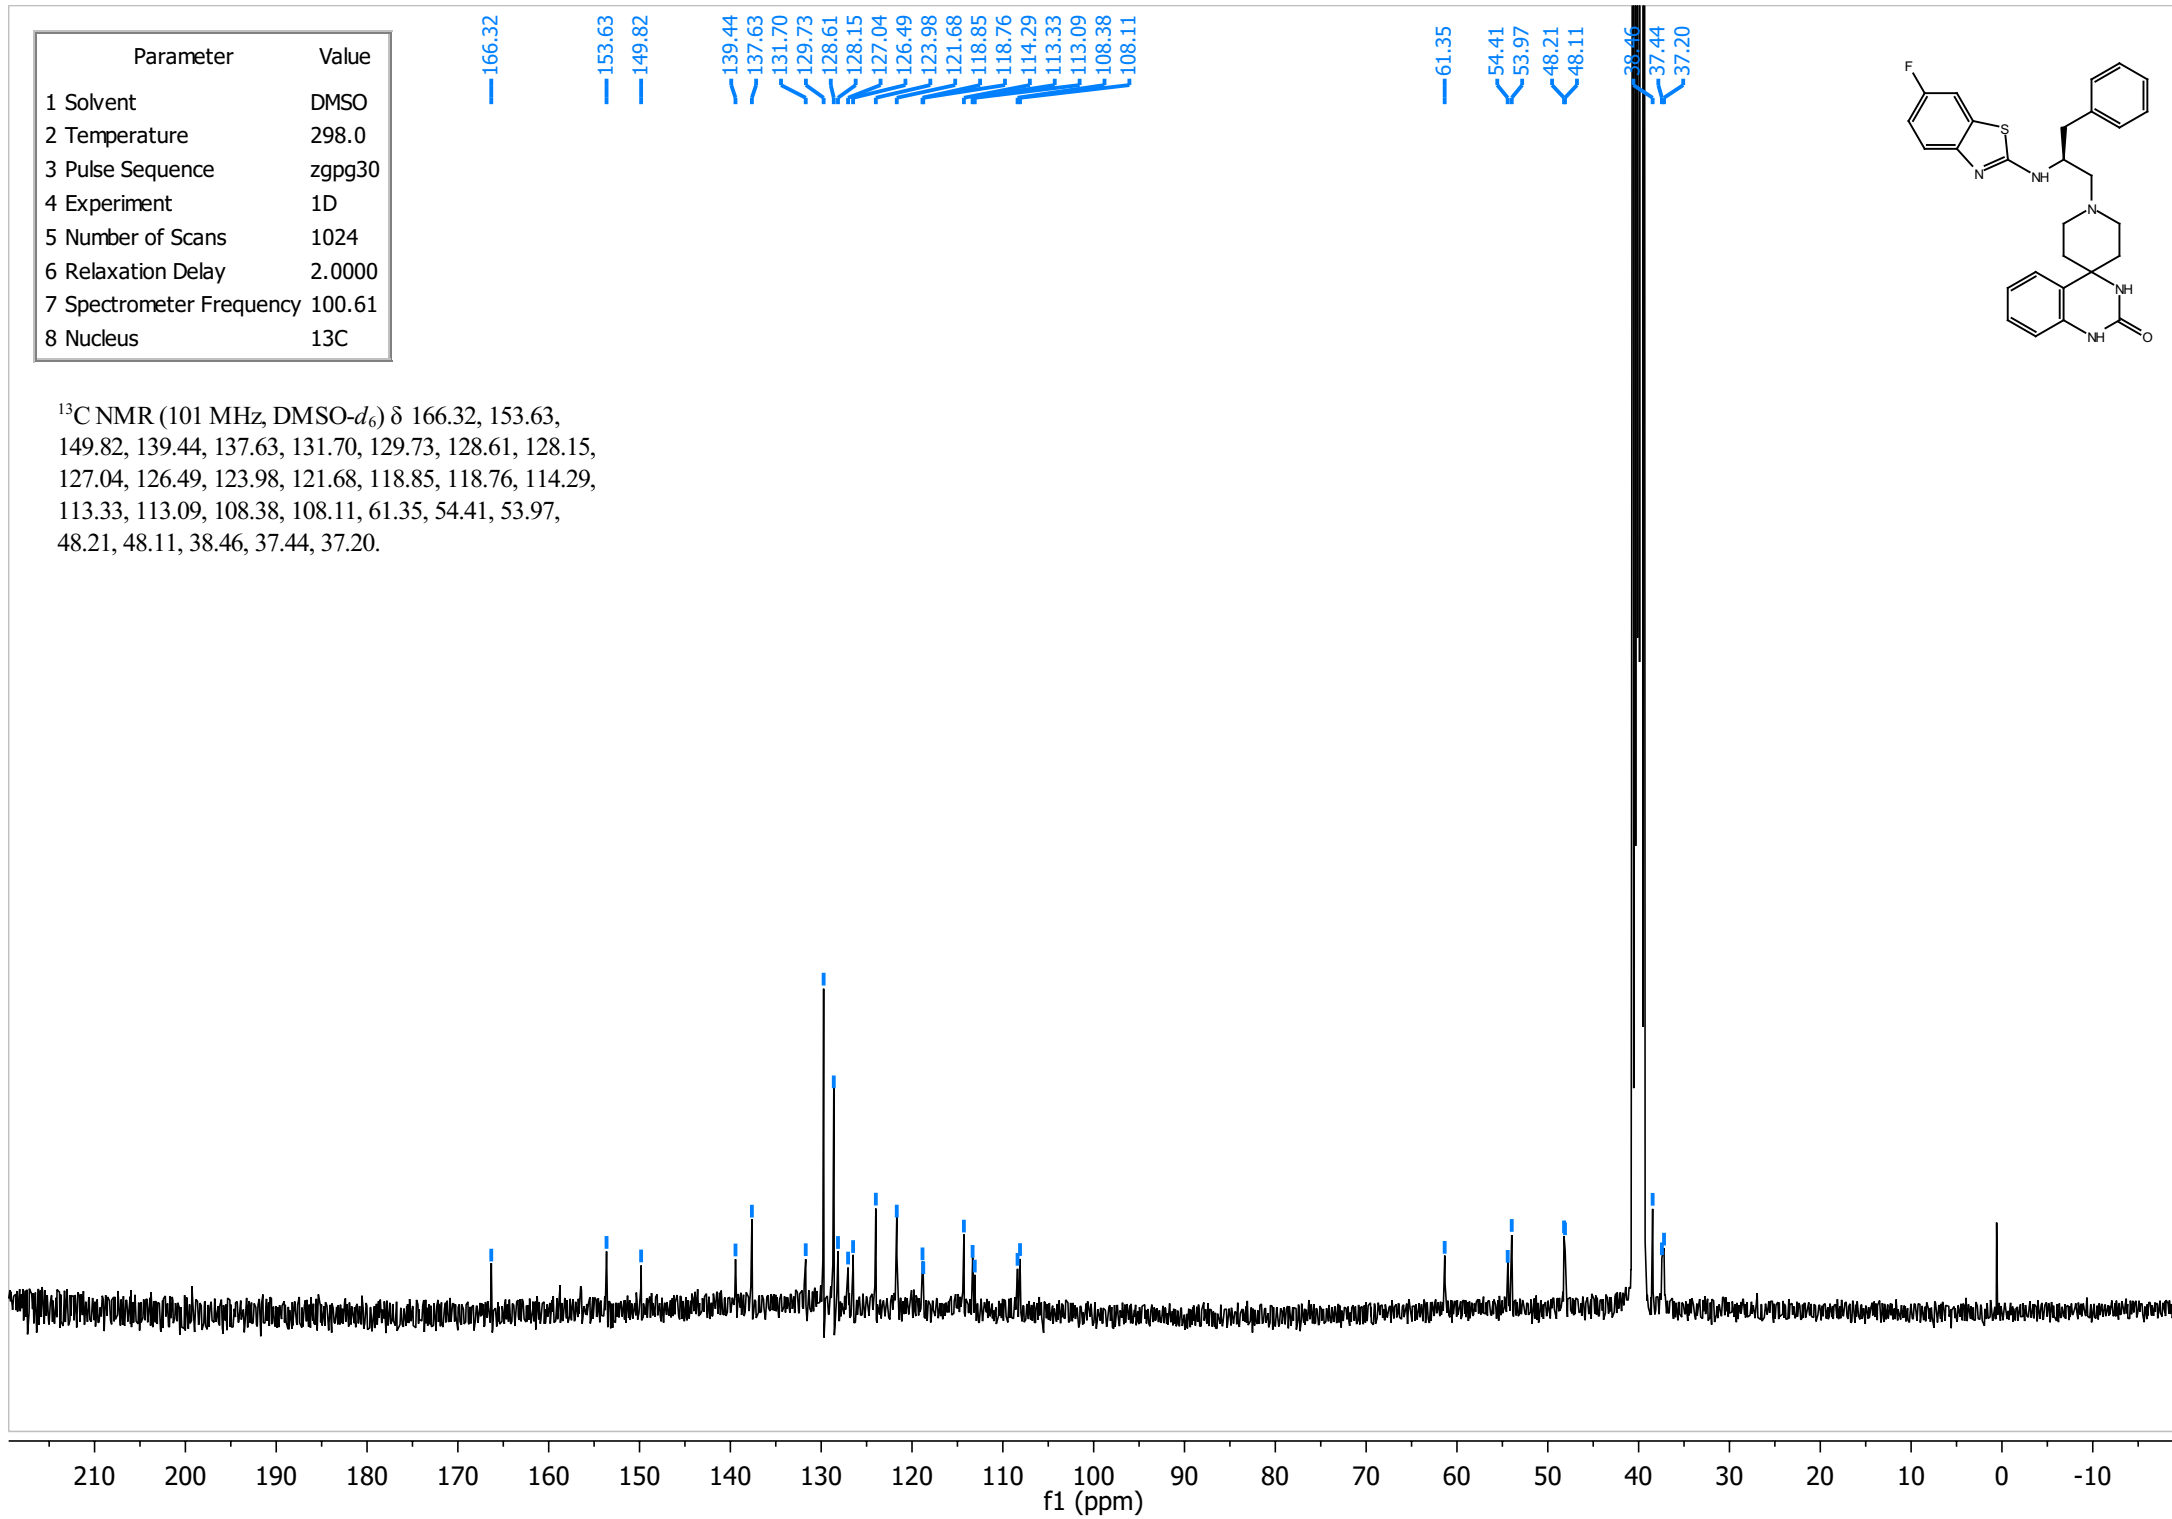



| Parameter                | Value           |
|--------------------------|-----------------|
| 1 Solvent                | DMSO            |
| 2 Temperature            | 298.0           |
| 3 Pulse Sequence         | zgfhigqn.2      |
| 4 Experiment             | 1D              |
| 5 Number of Scans        | 64              |
| 6 Relaxation Delay       | 1.0000          |
| 7 Spectrometer Frequency | 376.50          |
| 8 Nucleus                | <sup>19</sup> F |

<sup>19</sup>F NMR (376 MHz, DMSO-*d*<sub>6</sub>) δ -122.47.

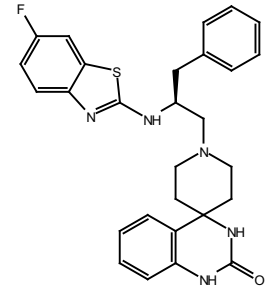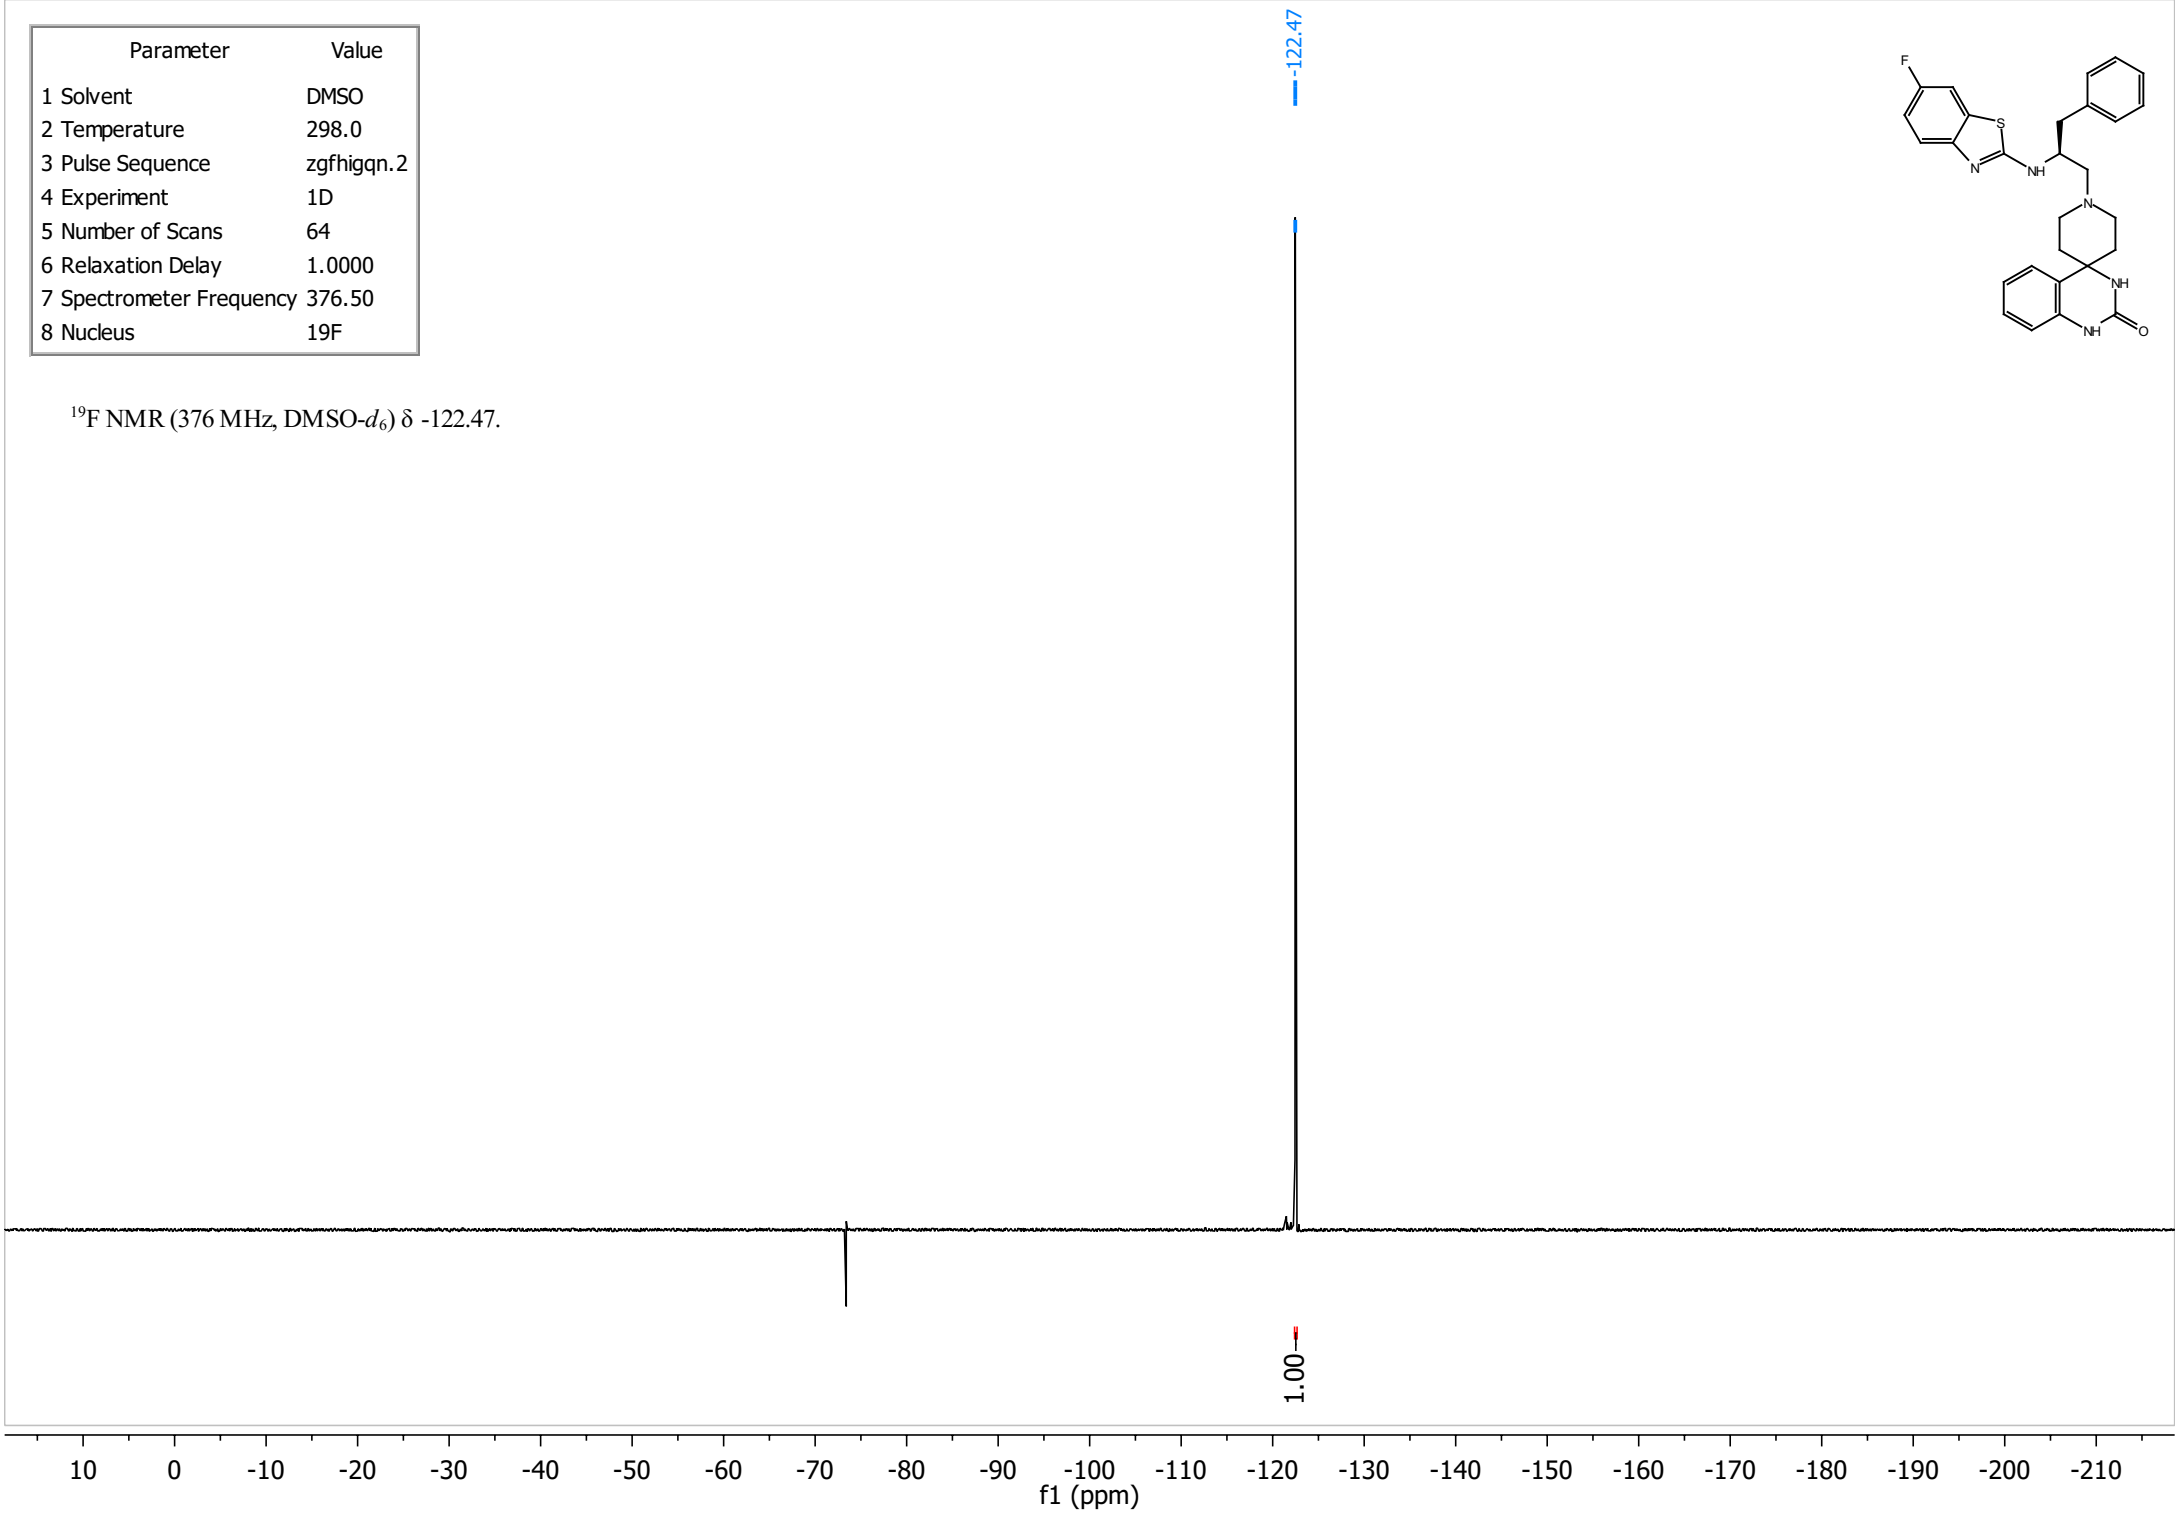

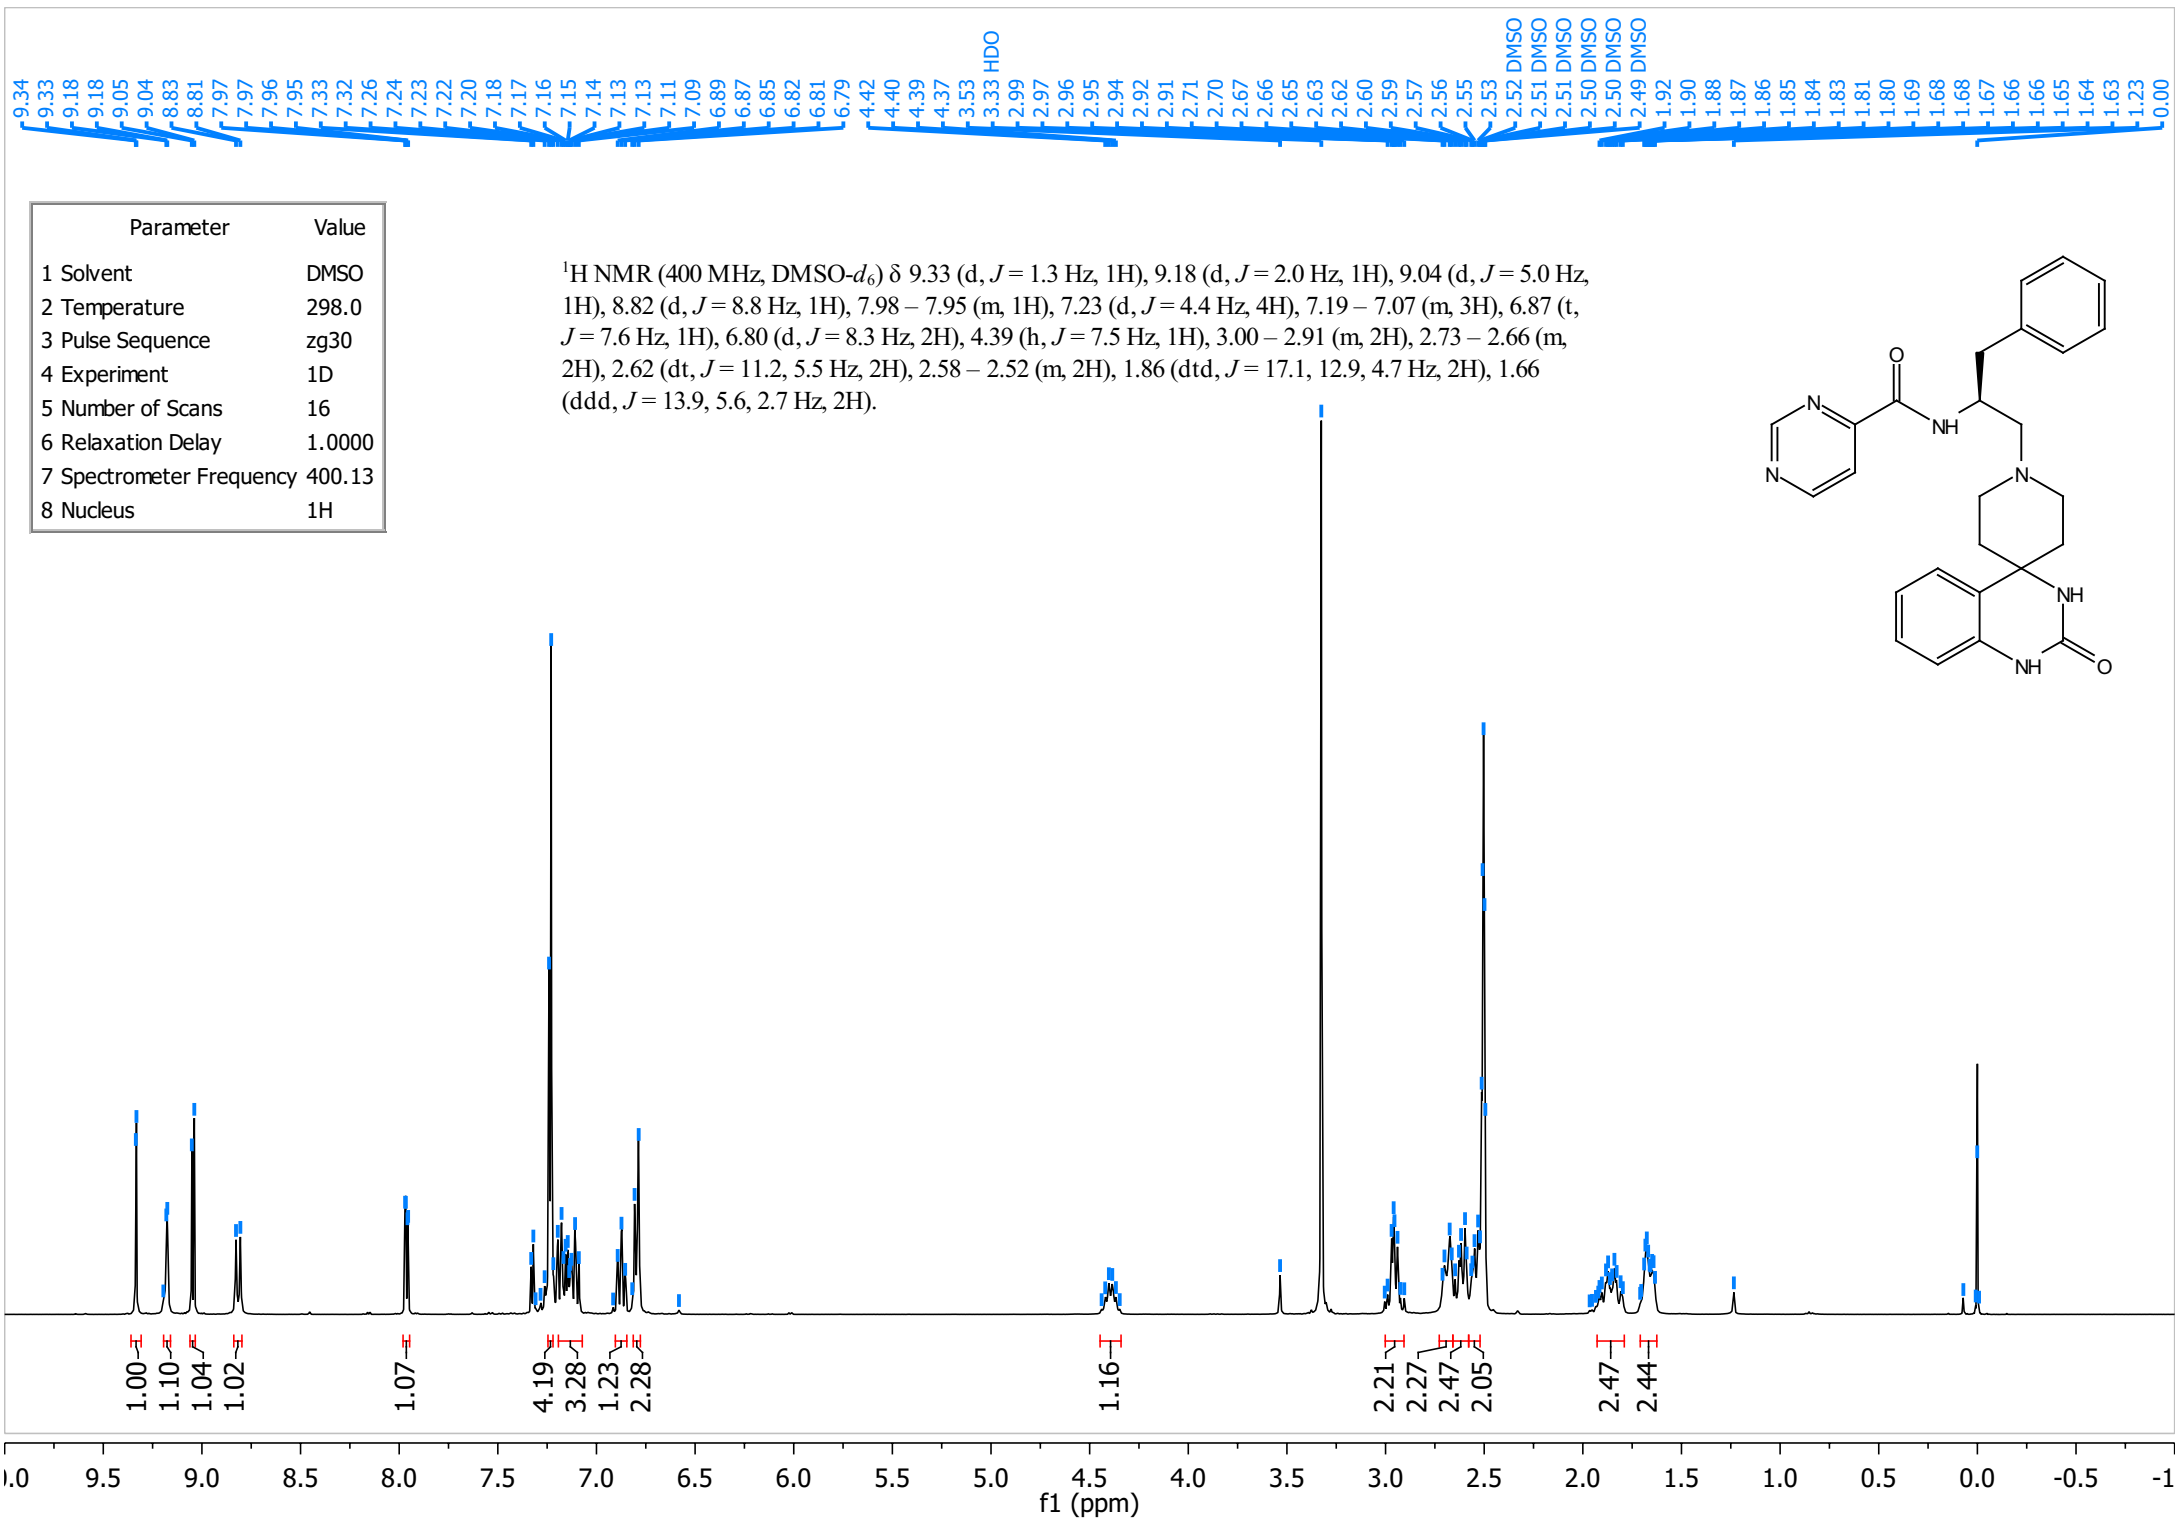

| Parameter                | Value  |
|--------------------------|--------|
| 1 Solvent                | DMSO   |
| 2 Temperature            | 298.0  |
| 3 Pulse Sequence         | zgpg30 |
| 4 Experiment             | 1D     |
| 5 Number of Scans        | 256    |
| 6 Relaxation Delay       | 2.0000 |
| 7 Spectrometer Frequency | 100.61 |
| 8 Nucleus                | 13C    |

$^{13}\text{C}$  NMR (101 MHz, DMSO- $d_6$ )  $\delta$  162.60, 160.14, 158.32, 156.97, 153.69, 139.53, 137.65, 129.52, 128.64, 128.60, 128.15, 127.06, 126.44, 124.00, 121.73, 118.99, 114.30, 61.35, 53.99, 49.09, 48.04, 48.00, 38.51, 37.30, 37.17.

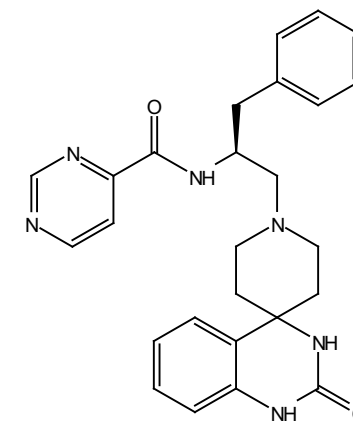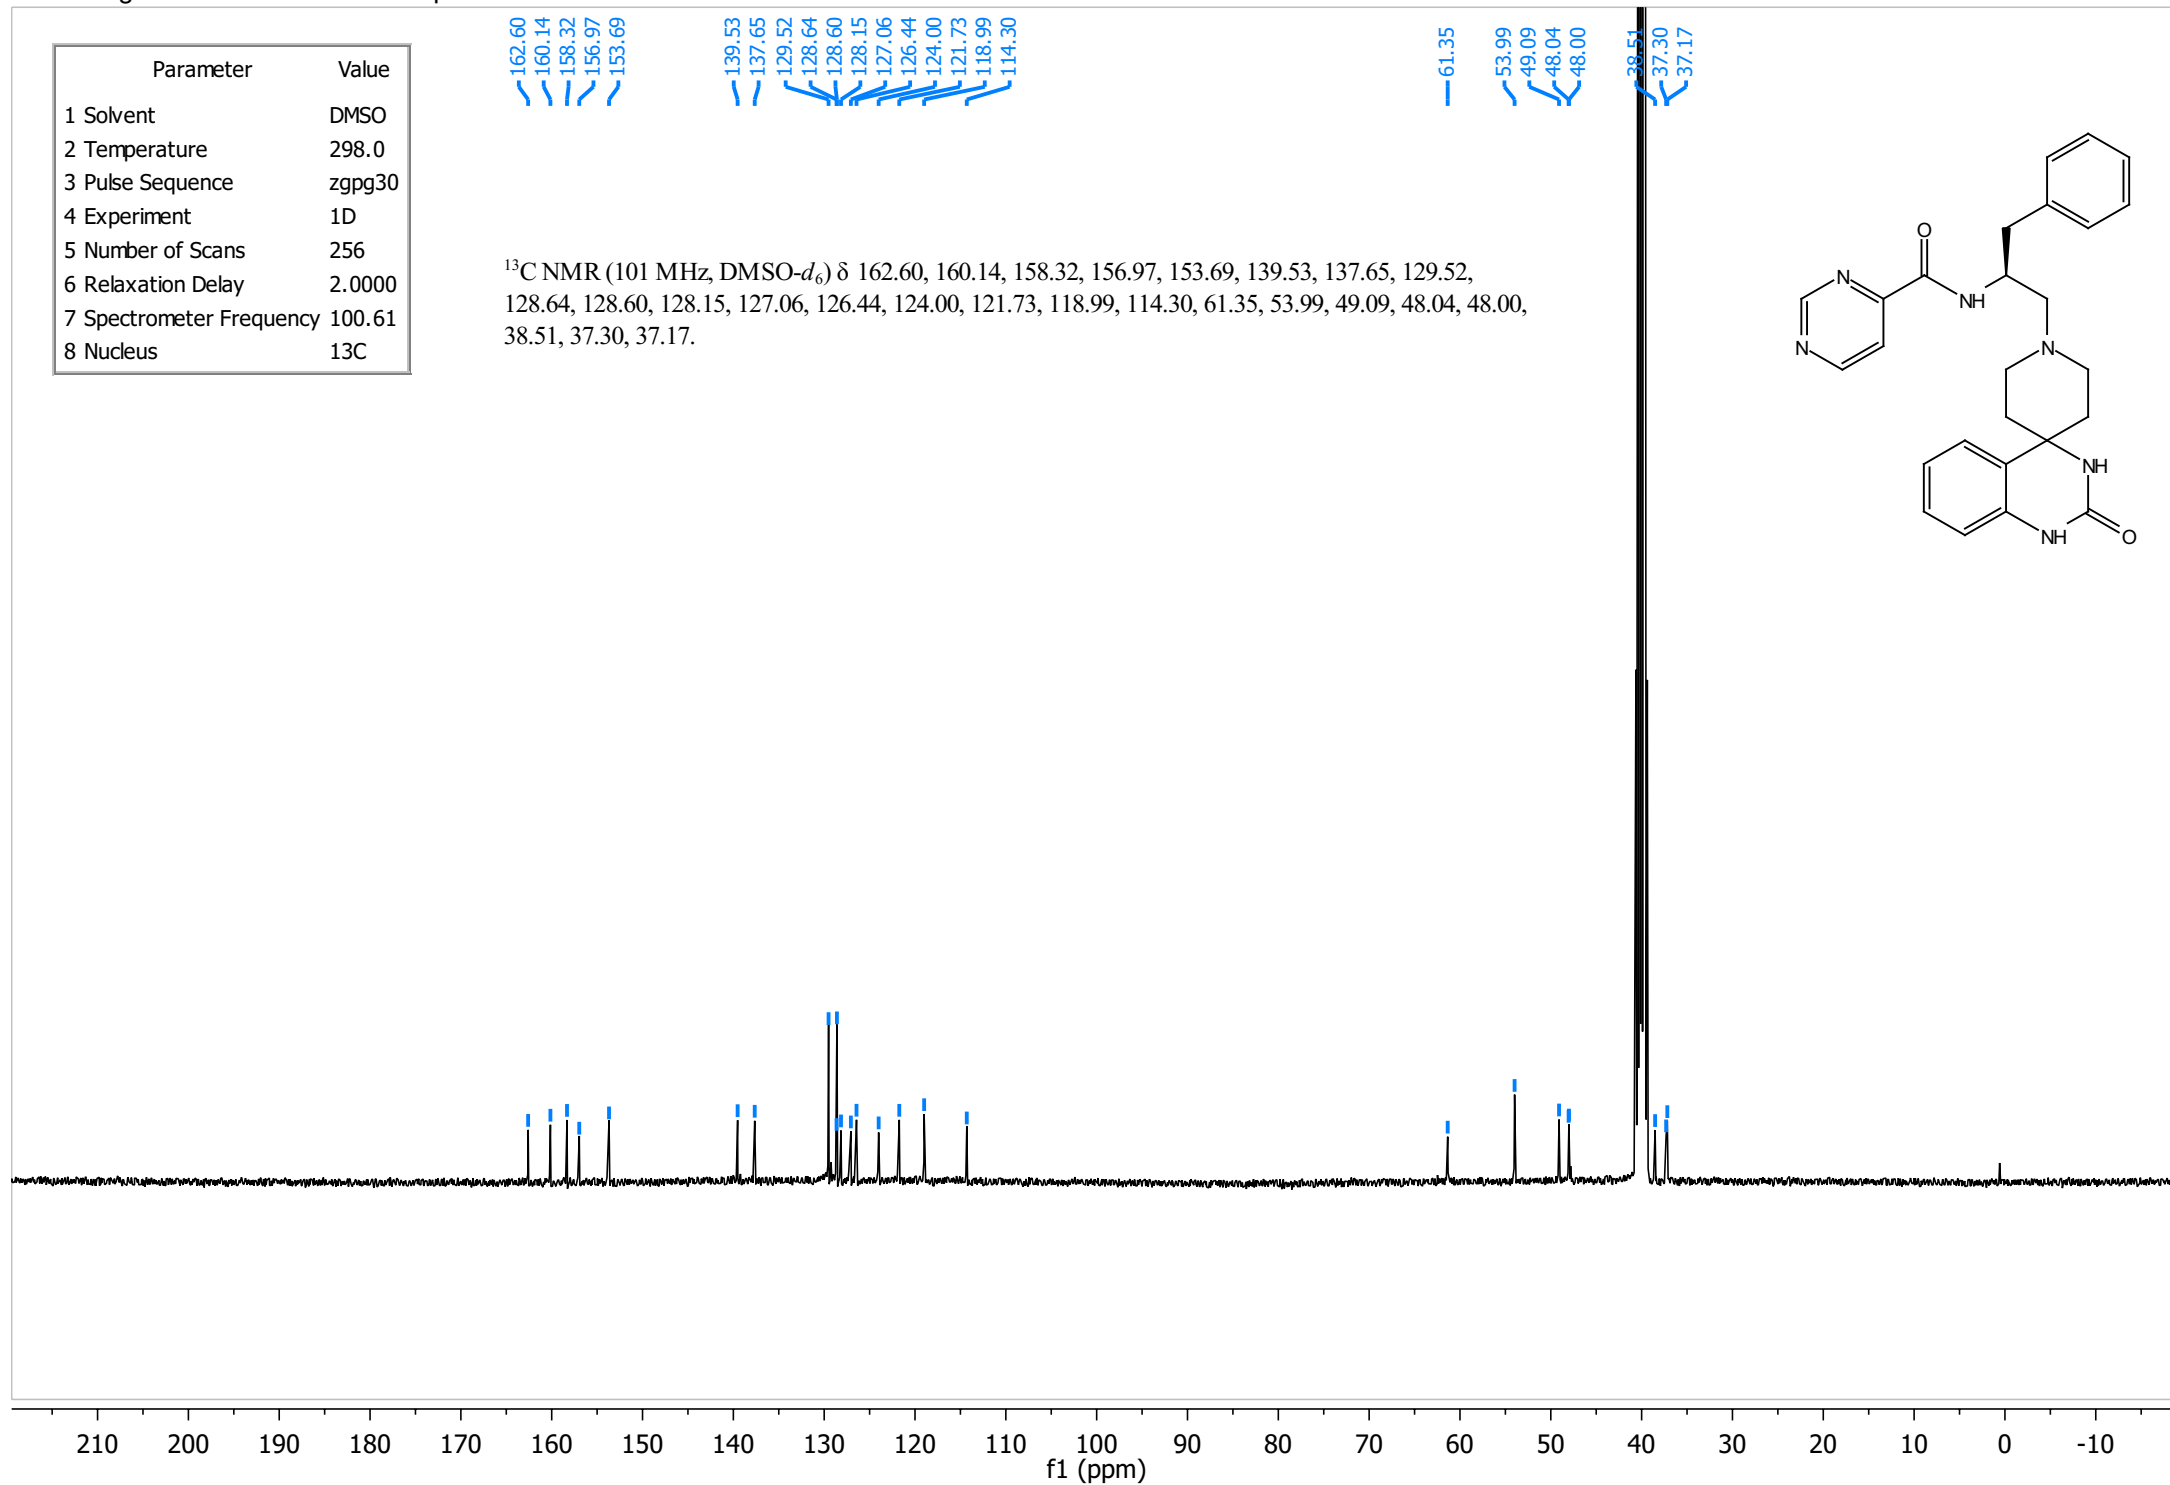

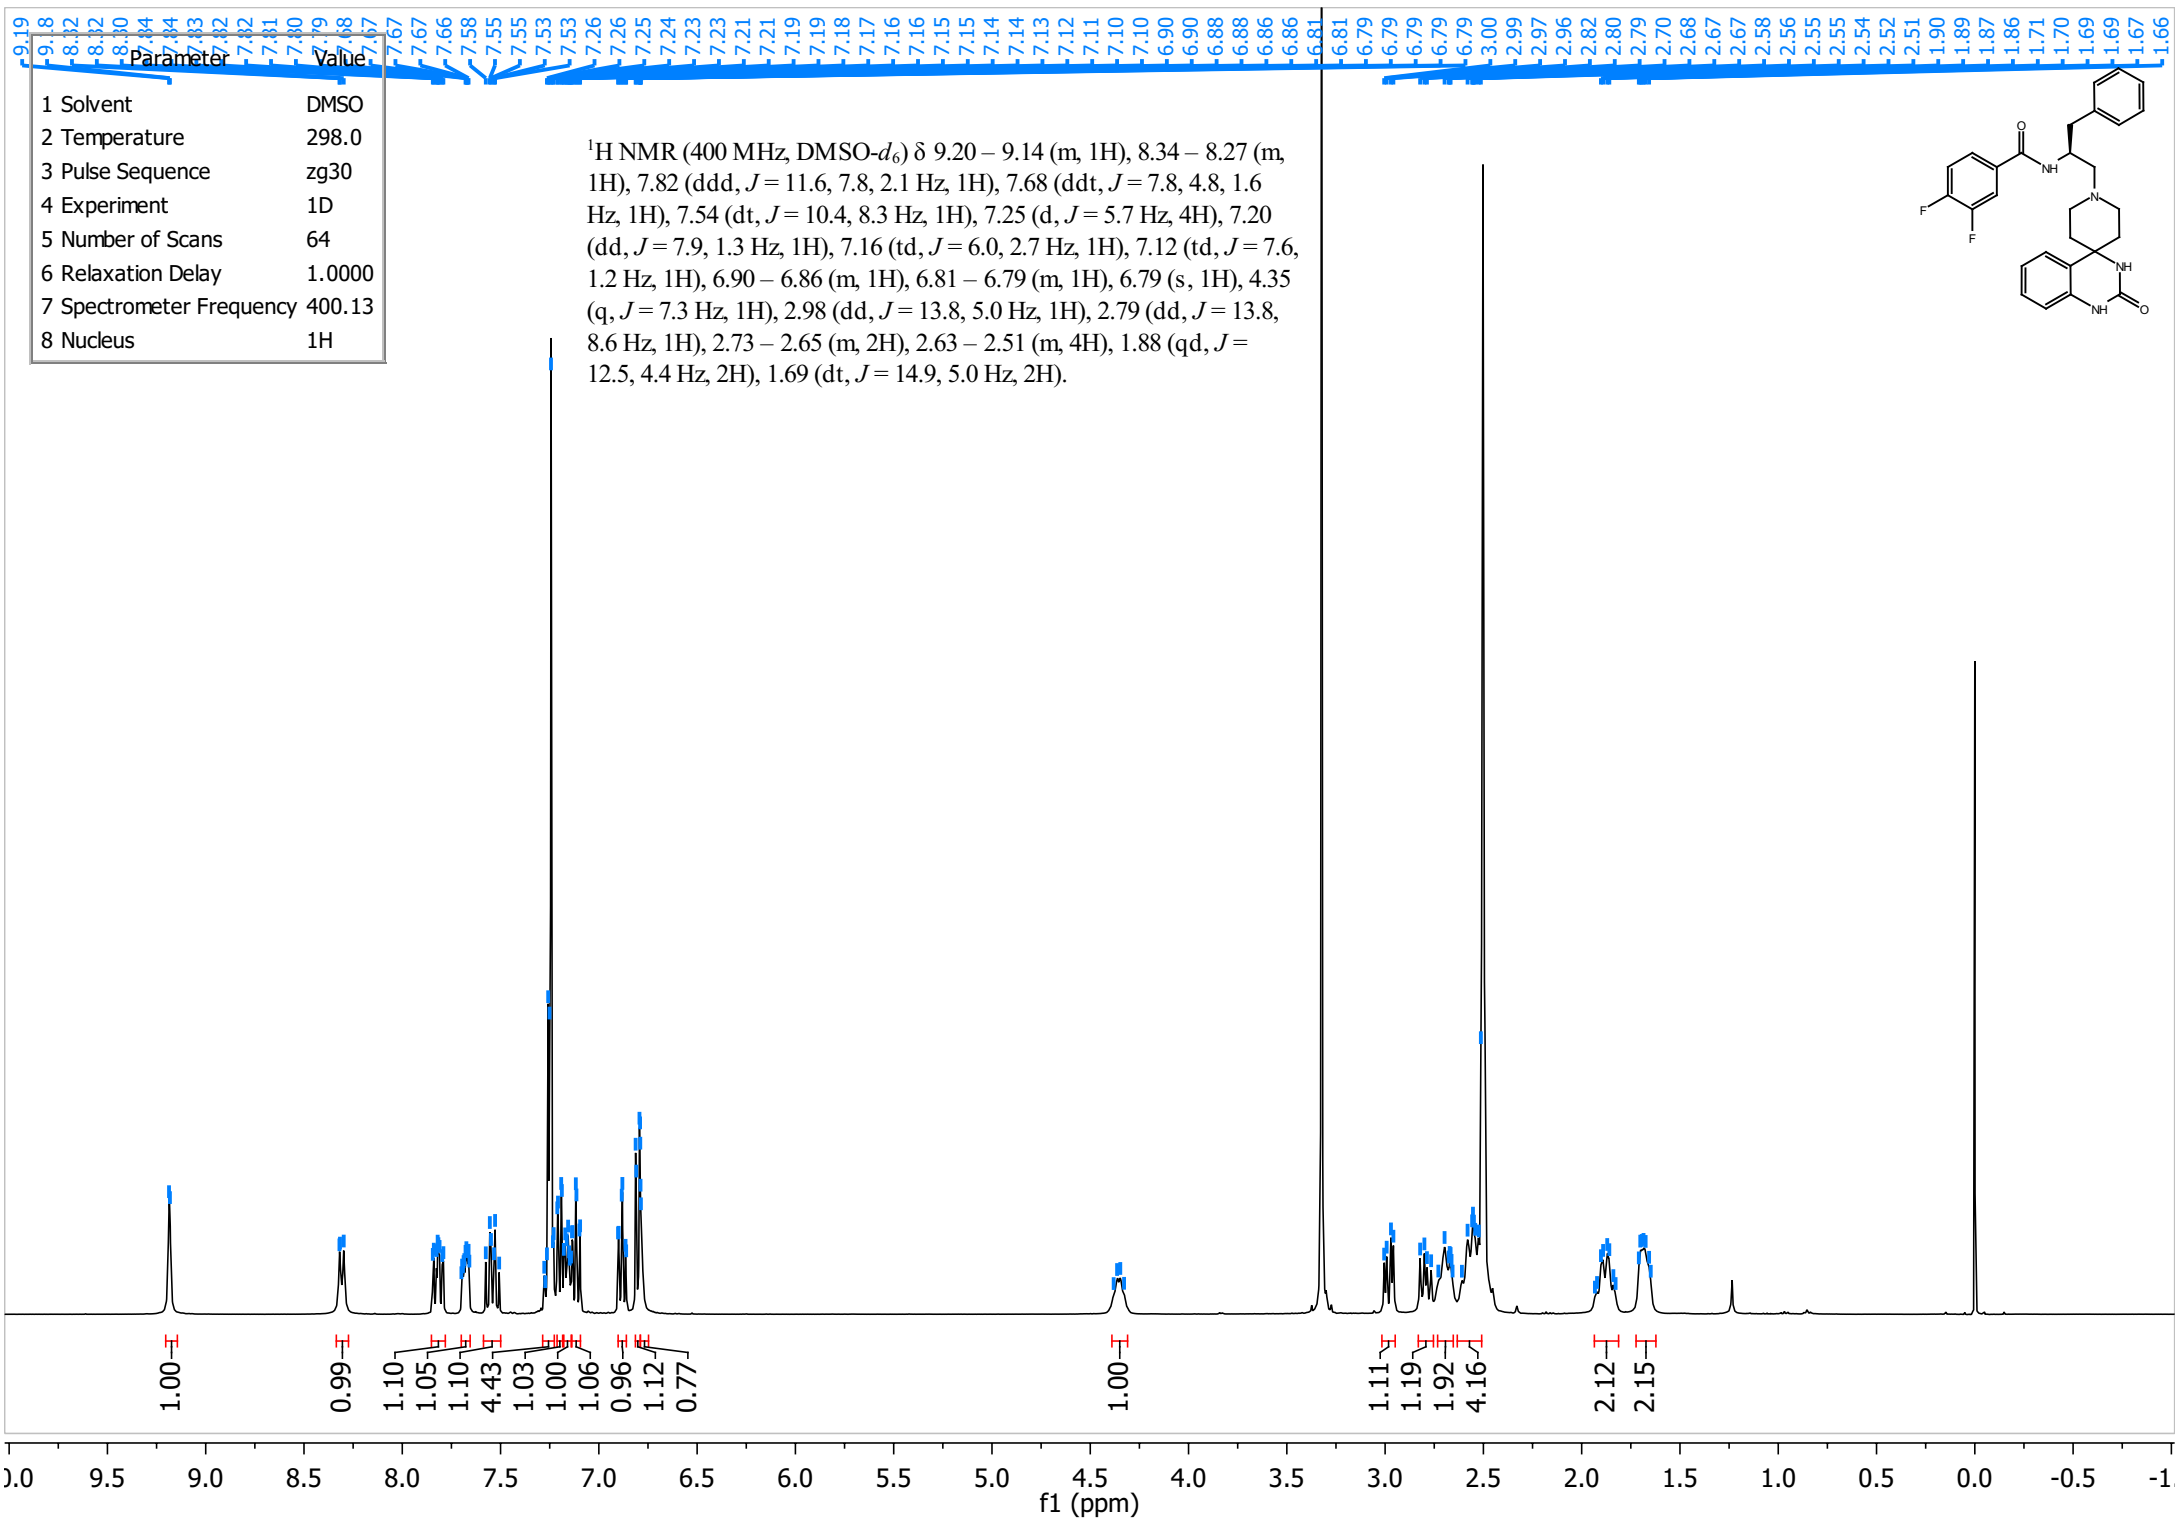

| Parameter                | Value  |
|--------------------------|--------|
| 1 Solvent                | DMSO   |
| 2 Temperature            | 298.0  |
| 3 Pulse Sequence         | zg30   |
| 4 Experiment             | 1D     |
| 5 Number of Scans        | 64     |
| 6 Relaxation Delay       | 1.0000 |
| 7 Spectrometer Frequency | 400.13 |
| 8 Nucleus                | 1H     |

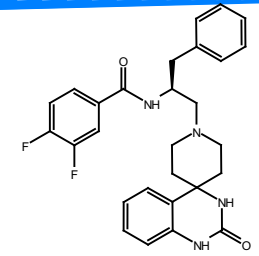

| Parameter                | Value           |
|--------------------------|-----------------|
| 1 Solvent                | DMSO            |
| 2 Temperature            | 298.0           |
| 3 Pulse Sequence         | zgpg30          |
| 4 Experiment             | 1D              |
| 5 Number of Scans        | 1024            |
| 6 Relaxation Delay       | 2.0000          |
| 7 Spectrometer Frequency | 100.61          |
| 8 Nucleus                | <sup>13</sup> C |

<sup>13</sup>C NMR (101 MHz, DMSO-*d*<sub>6</sub>) δ 164.14, 153.68, 150.83, 148.39, 139.70, 137.66, 132.66, 129.57, 128.57, 128.17, 127.08, 126.40, 125.09, 124.01, 121.74, 118.04, 117.87, 117.08, 116.90, 114.32, 61.69, 54.00, 49.39, 48.26, 47.85, 38.74, 37.34, 37.19.

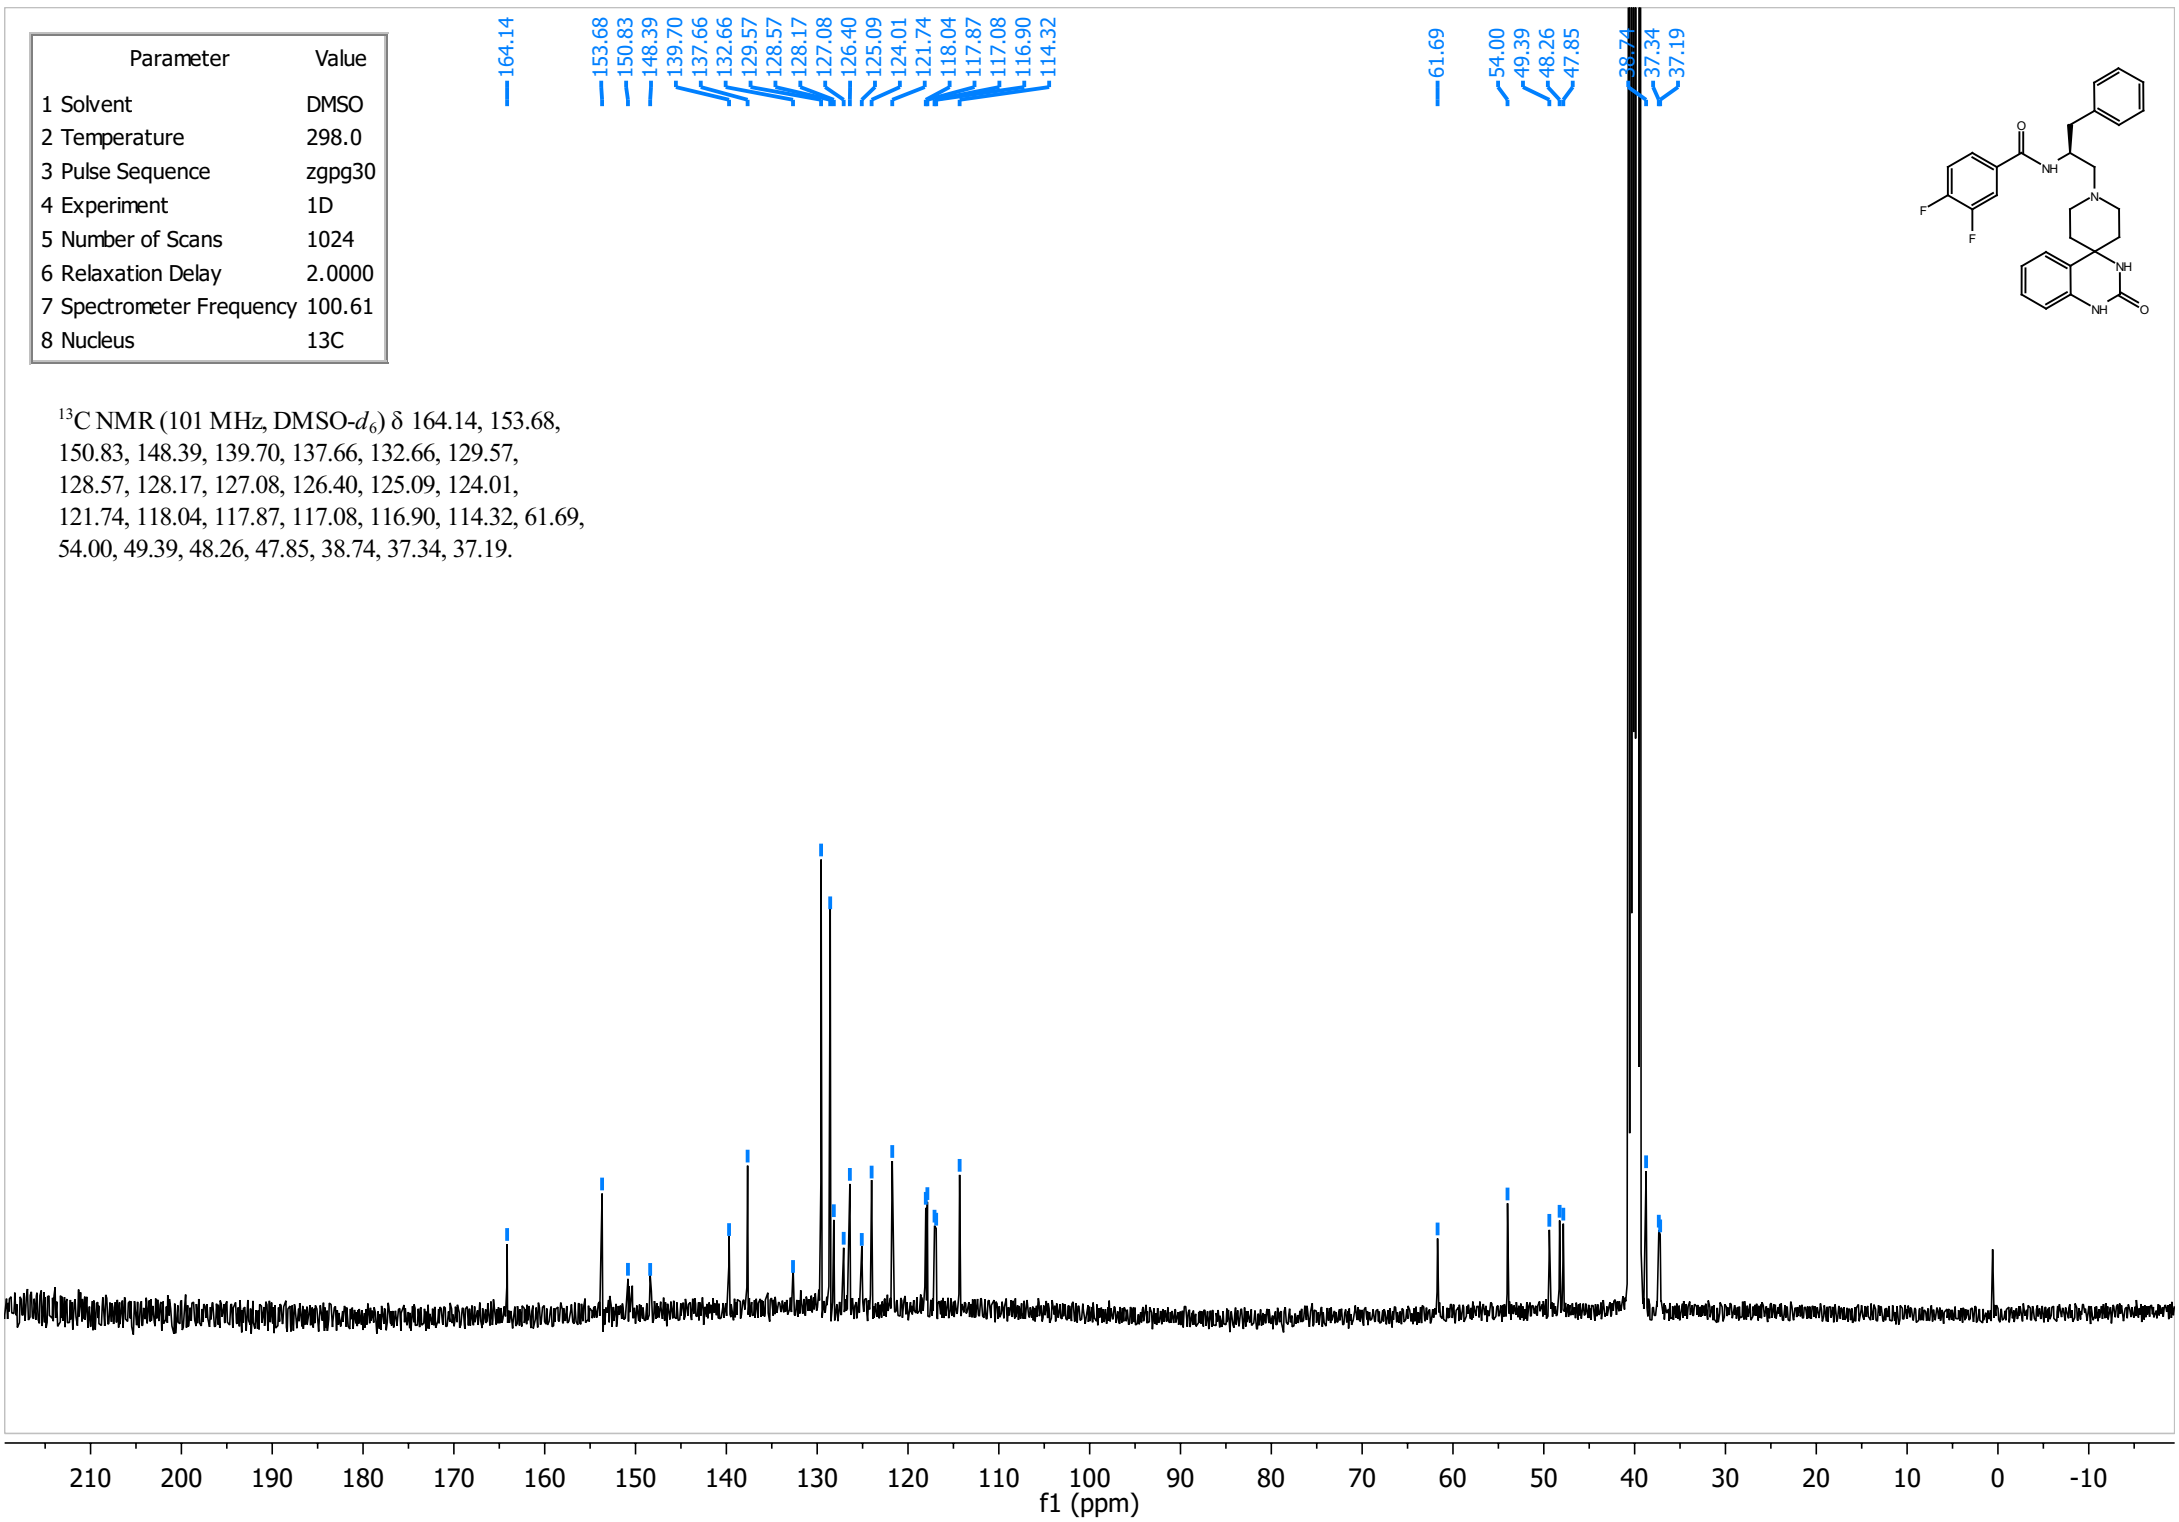

| Parameter                | Value           |
|--------------------------|-----------------|
| 1 Solvent                | DMSO            |
| 2 Temperature            | 298.0           |
| 3 Pulse Sequence         | zgfhigqn.2      |
| 4 Experiment             | 1D              |
| 5 Number of Scans        | 64              |
| 6 Relaxation Delay       | 1.0000          |
| 7 Spectrometer Frequency | 376.50          |
| 8 Nucleus                | <sup>19</sup> F |

<sup>19</sup>F NMR (376 MHz, DMSO-*d*<sub>6</sub>) δ -135.02 (d, *J* = 22.5 Hz),  
-138.13 (d, *J* = 22.1 Hz).

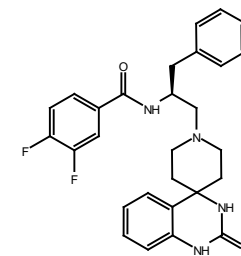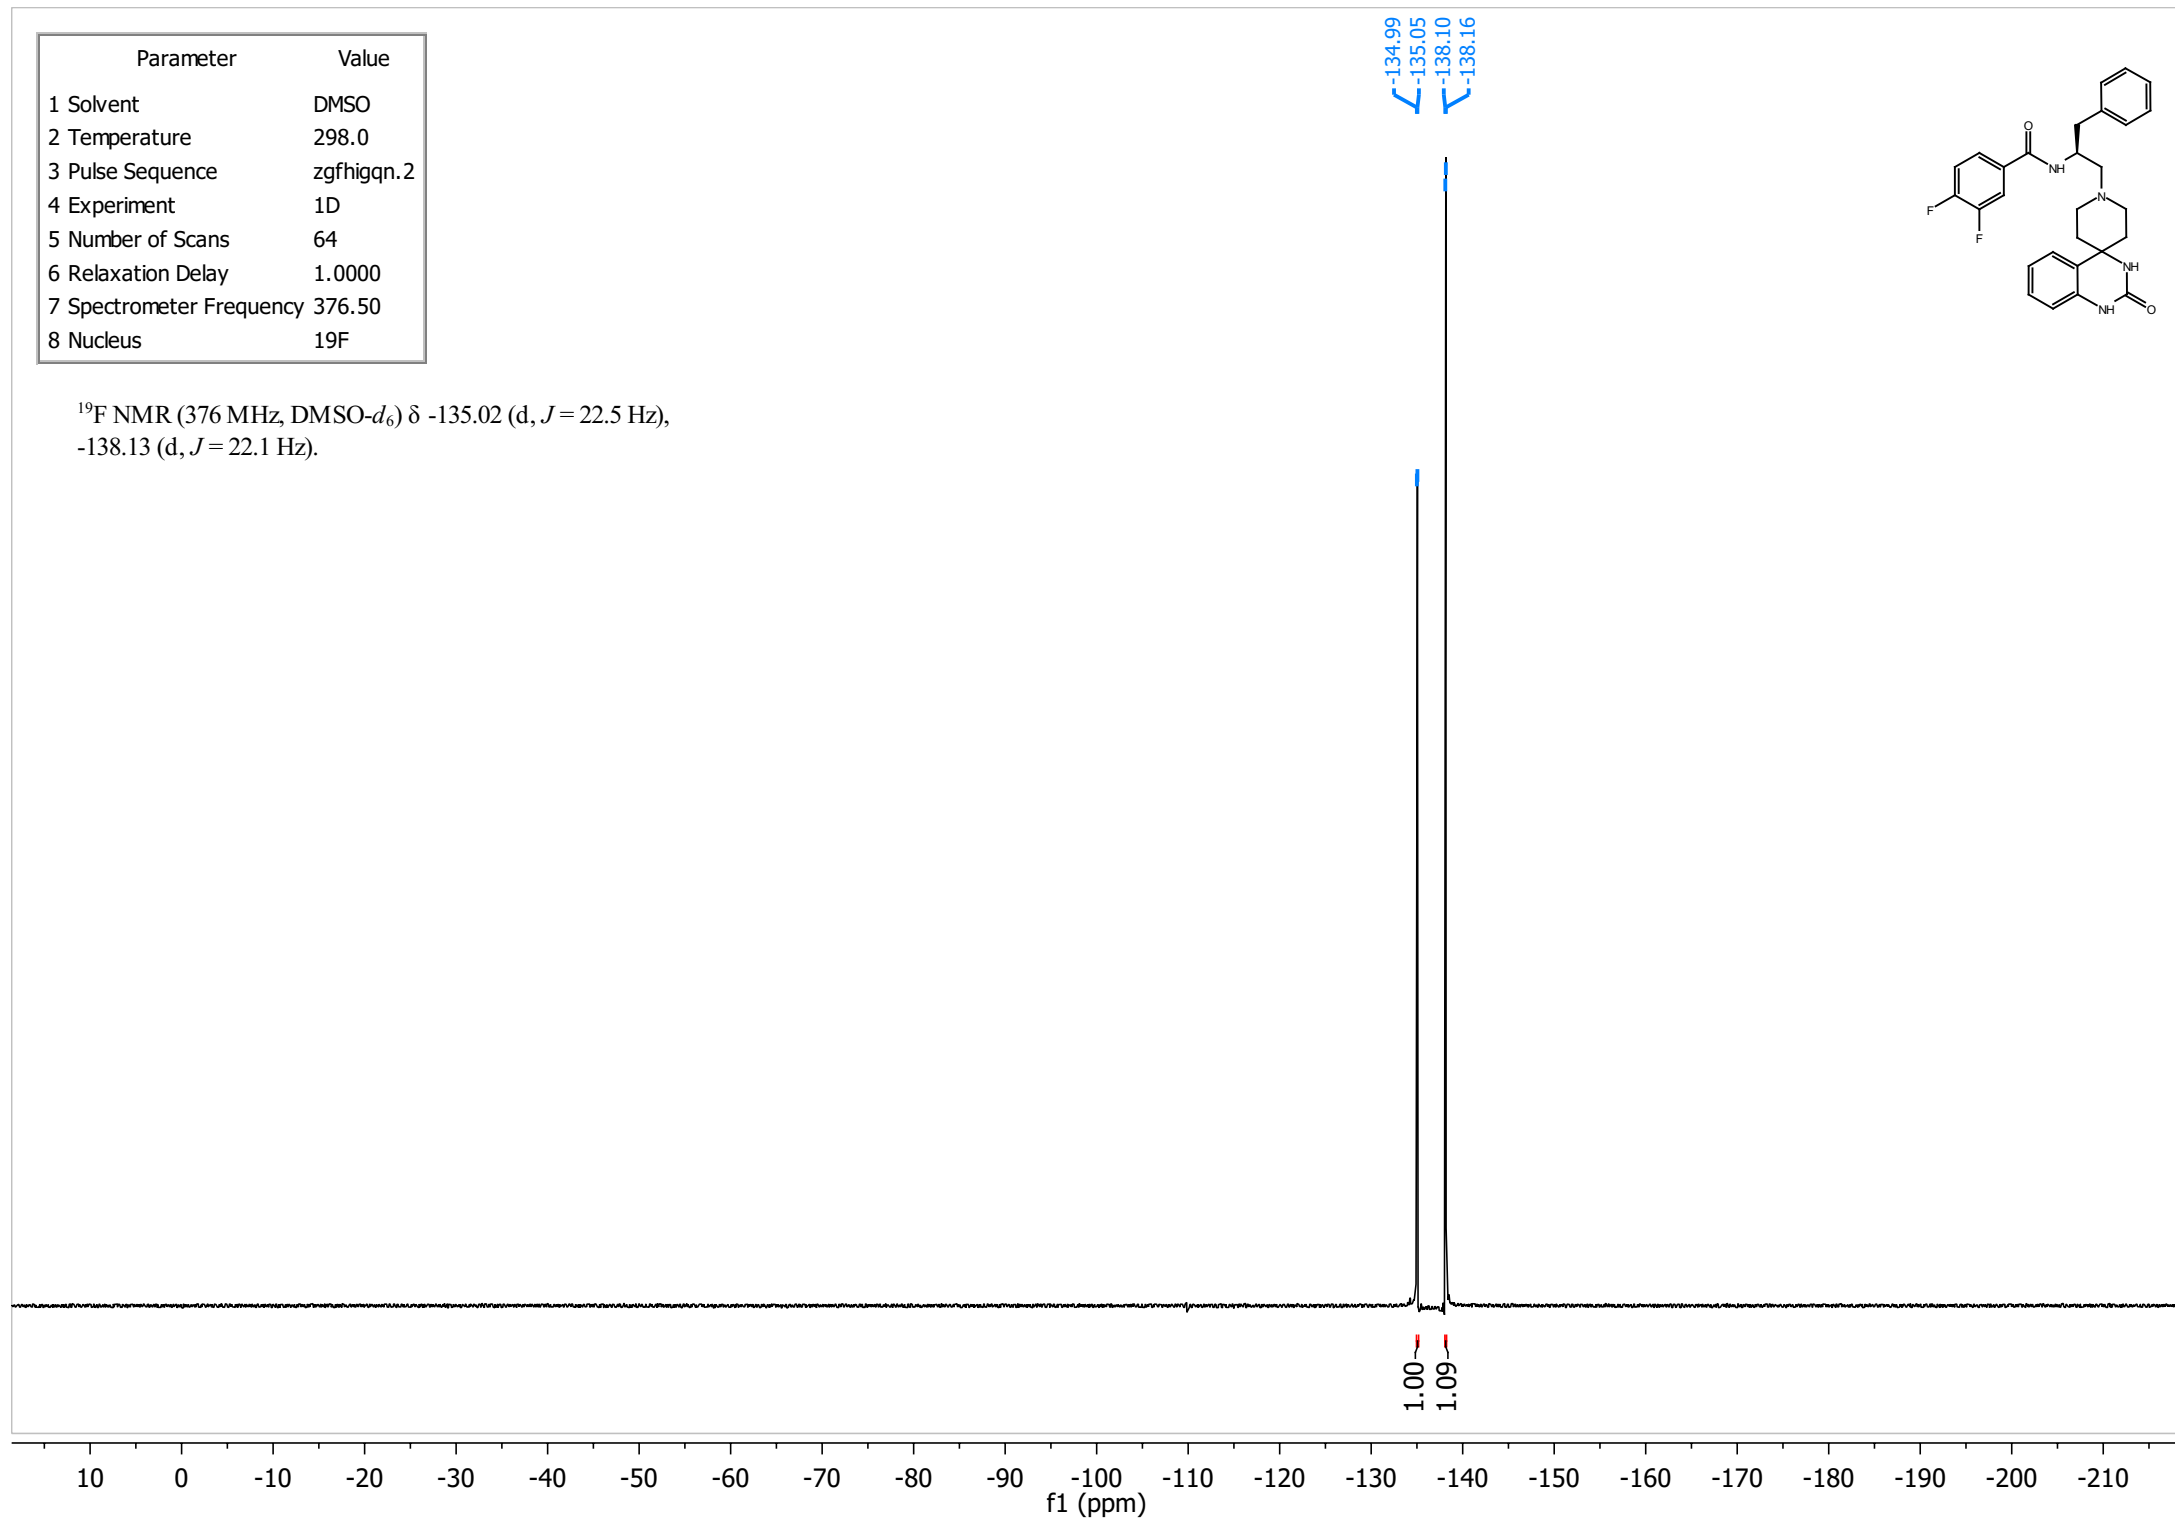

| Parameter                | Value  |
|--------------------------|--------|
| 1 Solvent                | DMSO   |
| 2 Temperature            | 298.0  |
| 3 Pulse Sequence         | zg30   |
| 4 Experiment             | 1D     |
| 5 Number of Scans        | 16     |
| 6 Relaxation Delay       | 1.0000 |
| 7 Spectrometer Frequency | 400.13 |
| 8 Nucleus                | 1H     |

$^1\text{H}$  NMR (400 MHz, DMSO- $d_6$ )  $\delta$  7.60 (d,  $J = 2.1$  Hz, 1H), 7.45 (d,  $J = 9.0$  Hz, 1H), 7.33 (d,  $J = 5.8$  Hz, 4H), 7.25 (pd,  $J = 5.1, 2.5$  Hz, 1H), 7.09 (d,  $J = 2.2$  Hz, 1H), 6.65 (d,  $J = 9.0$  Hz, 1H), 3.82 (s, 3H), 3.17 (d,  $J = 5.3$  Hz, 1H), 2.68 (td,  $J = 12.6, 5.2$  Hz, 2H), 2.60 – 2.55 (m, 3H), 1.53 (d,  $J = 12.7$  Hz, 2H).

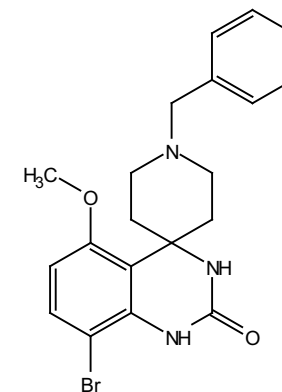

7.61  
7.60  
7.46  
7.44  
7.36  
7.34  
7.33  
7.32  
7.31  
7.28  
7.27  
7.26  
7.25  
7.24  
7.24  
7.24  
7.23  
7.22  
7.09  
7.08  
7.06  
6.66  
6.64

3.82  
3.79  
3.69  
3.67  
3.66  
3.65  
3.60  
3.59  
3.57  
3.53 H<sub>2</sub>O  
3.35  
3.33  
3.18  
3.16  
2.72  
2.70  
2.68  
2.67  
2.65  
2.64  
2.58  
2.57  
2.55  
2.54  
2.51 DMSO  
2.51 DMSO  
2.50 DMSO  
2.50 DMSO  
1.54  
1.51

-0.00

0.85  
1.04  
4.70  
1.36  
1.00  
1.02  
3.12  
1.03  
2.29  
3.33  
2.13

10.0 9.5 9.0 8.5 8.0 7.5 7.0 6.5 6.0 5.5 5.0 4.5 4.0 3.5 3.0 2.5 2.0 1.5 1.0 0.5 0.0 -0

f1 (ppm)

| Parameter                | Value          |
|--------------------------|----------------|
| 1 Solvent                | DMSO           |
| 2 Temperature            | 298.0          |
| 3 Pulse Sequence         | zg30           |
| 4 Experiment             | 1D             |
| 5 Number of Scans        | 16             |
| 6 Relaxation Delay       | 1.0000         |
| 7 Spectrometer Frequency | 400.13         |
| 8 Nucleus                | <sup>1</sup> H |

<sup>1</sup>H NMR (400 MHz, DMSO-*d*<sub>6</sub>) δ 9.27 (d, *J* = 1.7 Hz, 1H), 7.32 (d, *J* = 1.8 Hz, 1H), 7.13 (t, *J* = 8.1 Hz, 1H), 6.61 – 6.57 (m, 1H), 6.44 (dd, *J* = 8.1, 1.0 Hz, 1H), 3.80 (s, 3H), 3.37 (td, *J* = 13.5, 2.9 Hz, 3H), 3.14 (dd, *J* = 12.8, 4.4 Hz, 2H), 2.82 (td, *J* = 14.1, 4.9 Hz, 2H), 1.67 (d, *J* = 13.9 Hz, 2H).

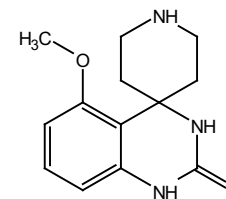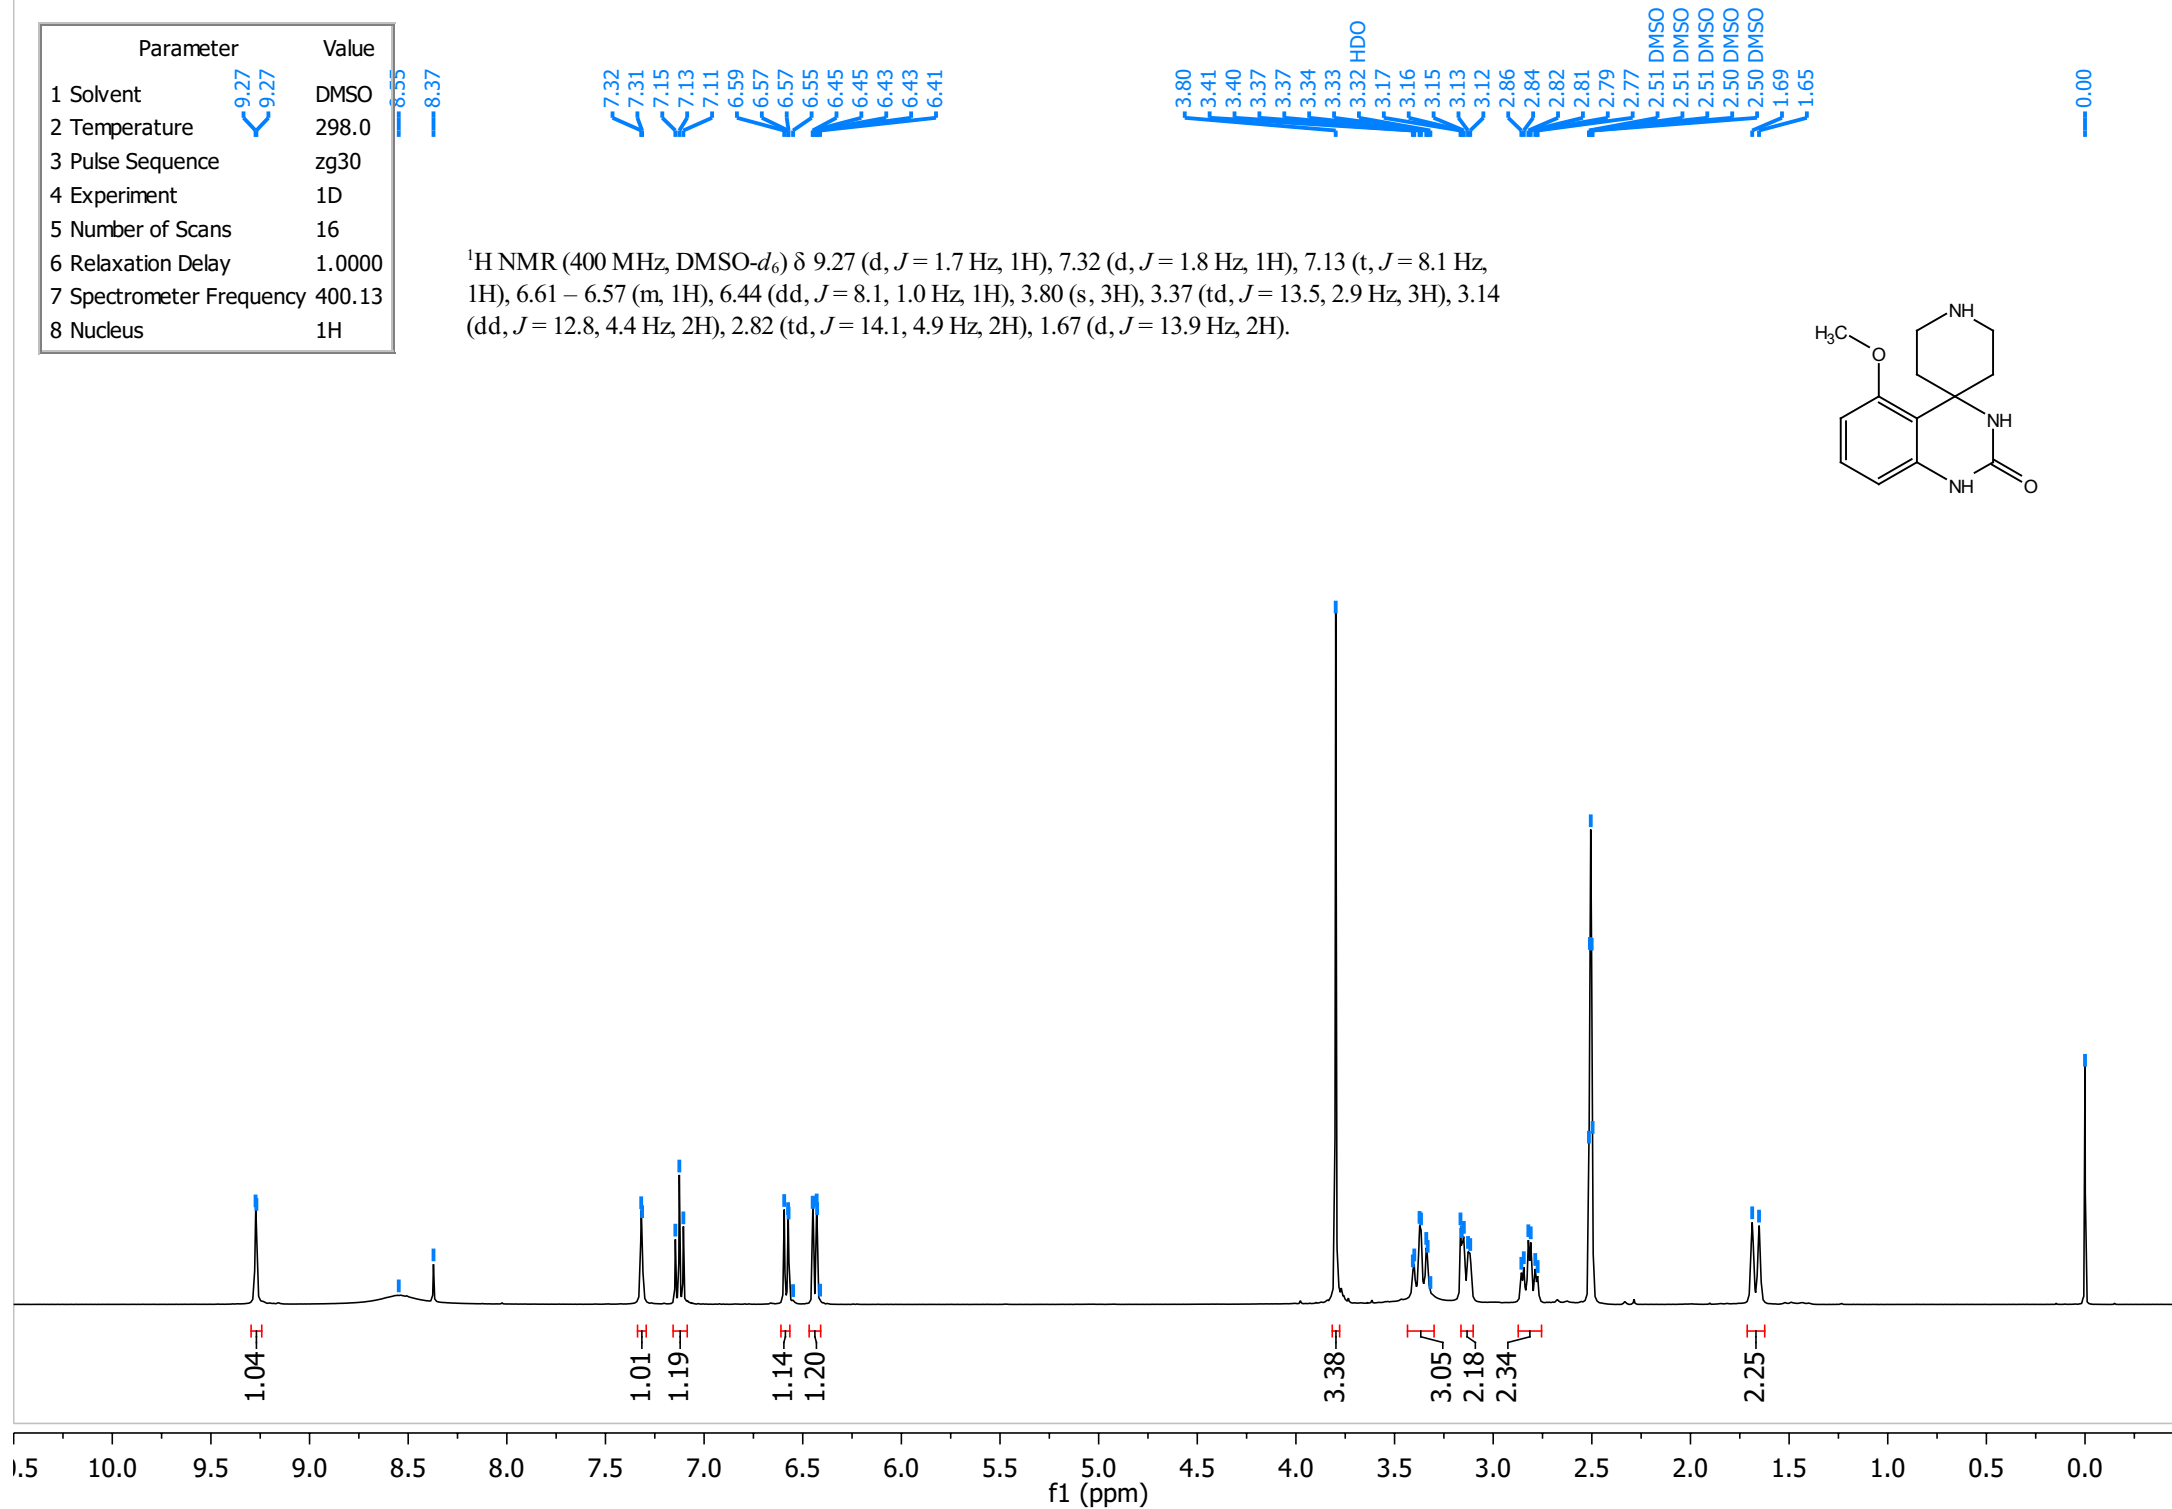



| Parameter                | Value        |
|--------------------------|--------------|
| 1 Solvent                | DMSO- $d_6$  |
| 2 Temperature            | 298.0        |
| 3 Pulse Sequence         | zg30         |
| 4 Experiment             | 1D           |
| 5 Number of Scans        | 64           |
| 6 Relaxation Delay       | 1.0000       |
| 7 Spectrometer Frequency | 400.13       |
| 8 Nucleus                | $^1\text{H}$ |

$^1\text{H}$  NMR (400 MHz, DMSO- $d_6$ )  $\delta$  9.09 (s, 1H), 7.27 (t,  $J = 7.5$  Hz, 2H), 7.24 – 7.14 (m, 3H), 7.07 (t,  $J = 8.1$  Hz, 1H), 6.62 (d,  $J = 8.7$  Hz, 1H), 6.59 – 6.50 (m, 2H), 6.42 (d,  $J = 7.9$  Hz, 1H), 3.85 – 3.77 (m, 1H), 3.74 (s, 3H), 2.82 (dd,  $J = 13.8, 5.0$  Hz, 1H), 2.71 – 2.54 (m, 6H), 2.34 (ddd,  $J = 48.9, 12.3, 7.1$  Hz, 3H), 1.46 (t,  $J = 10.9$  Hz, 2H), 1.34 (s, 9H).

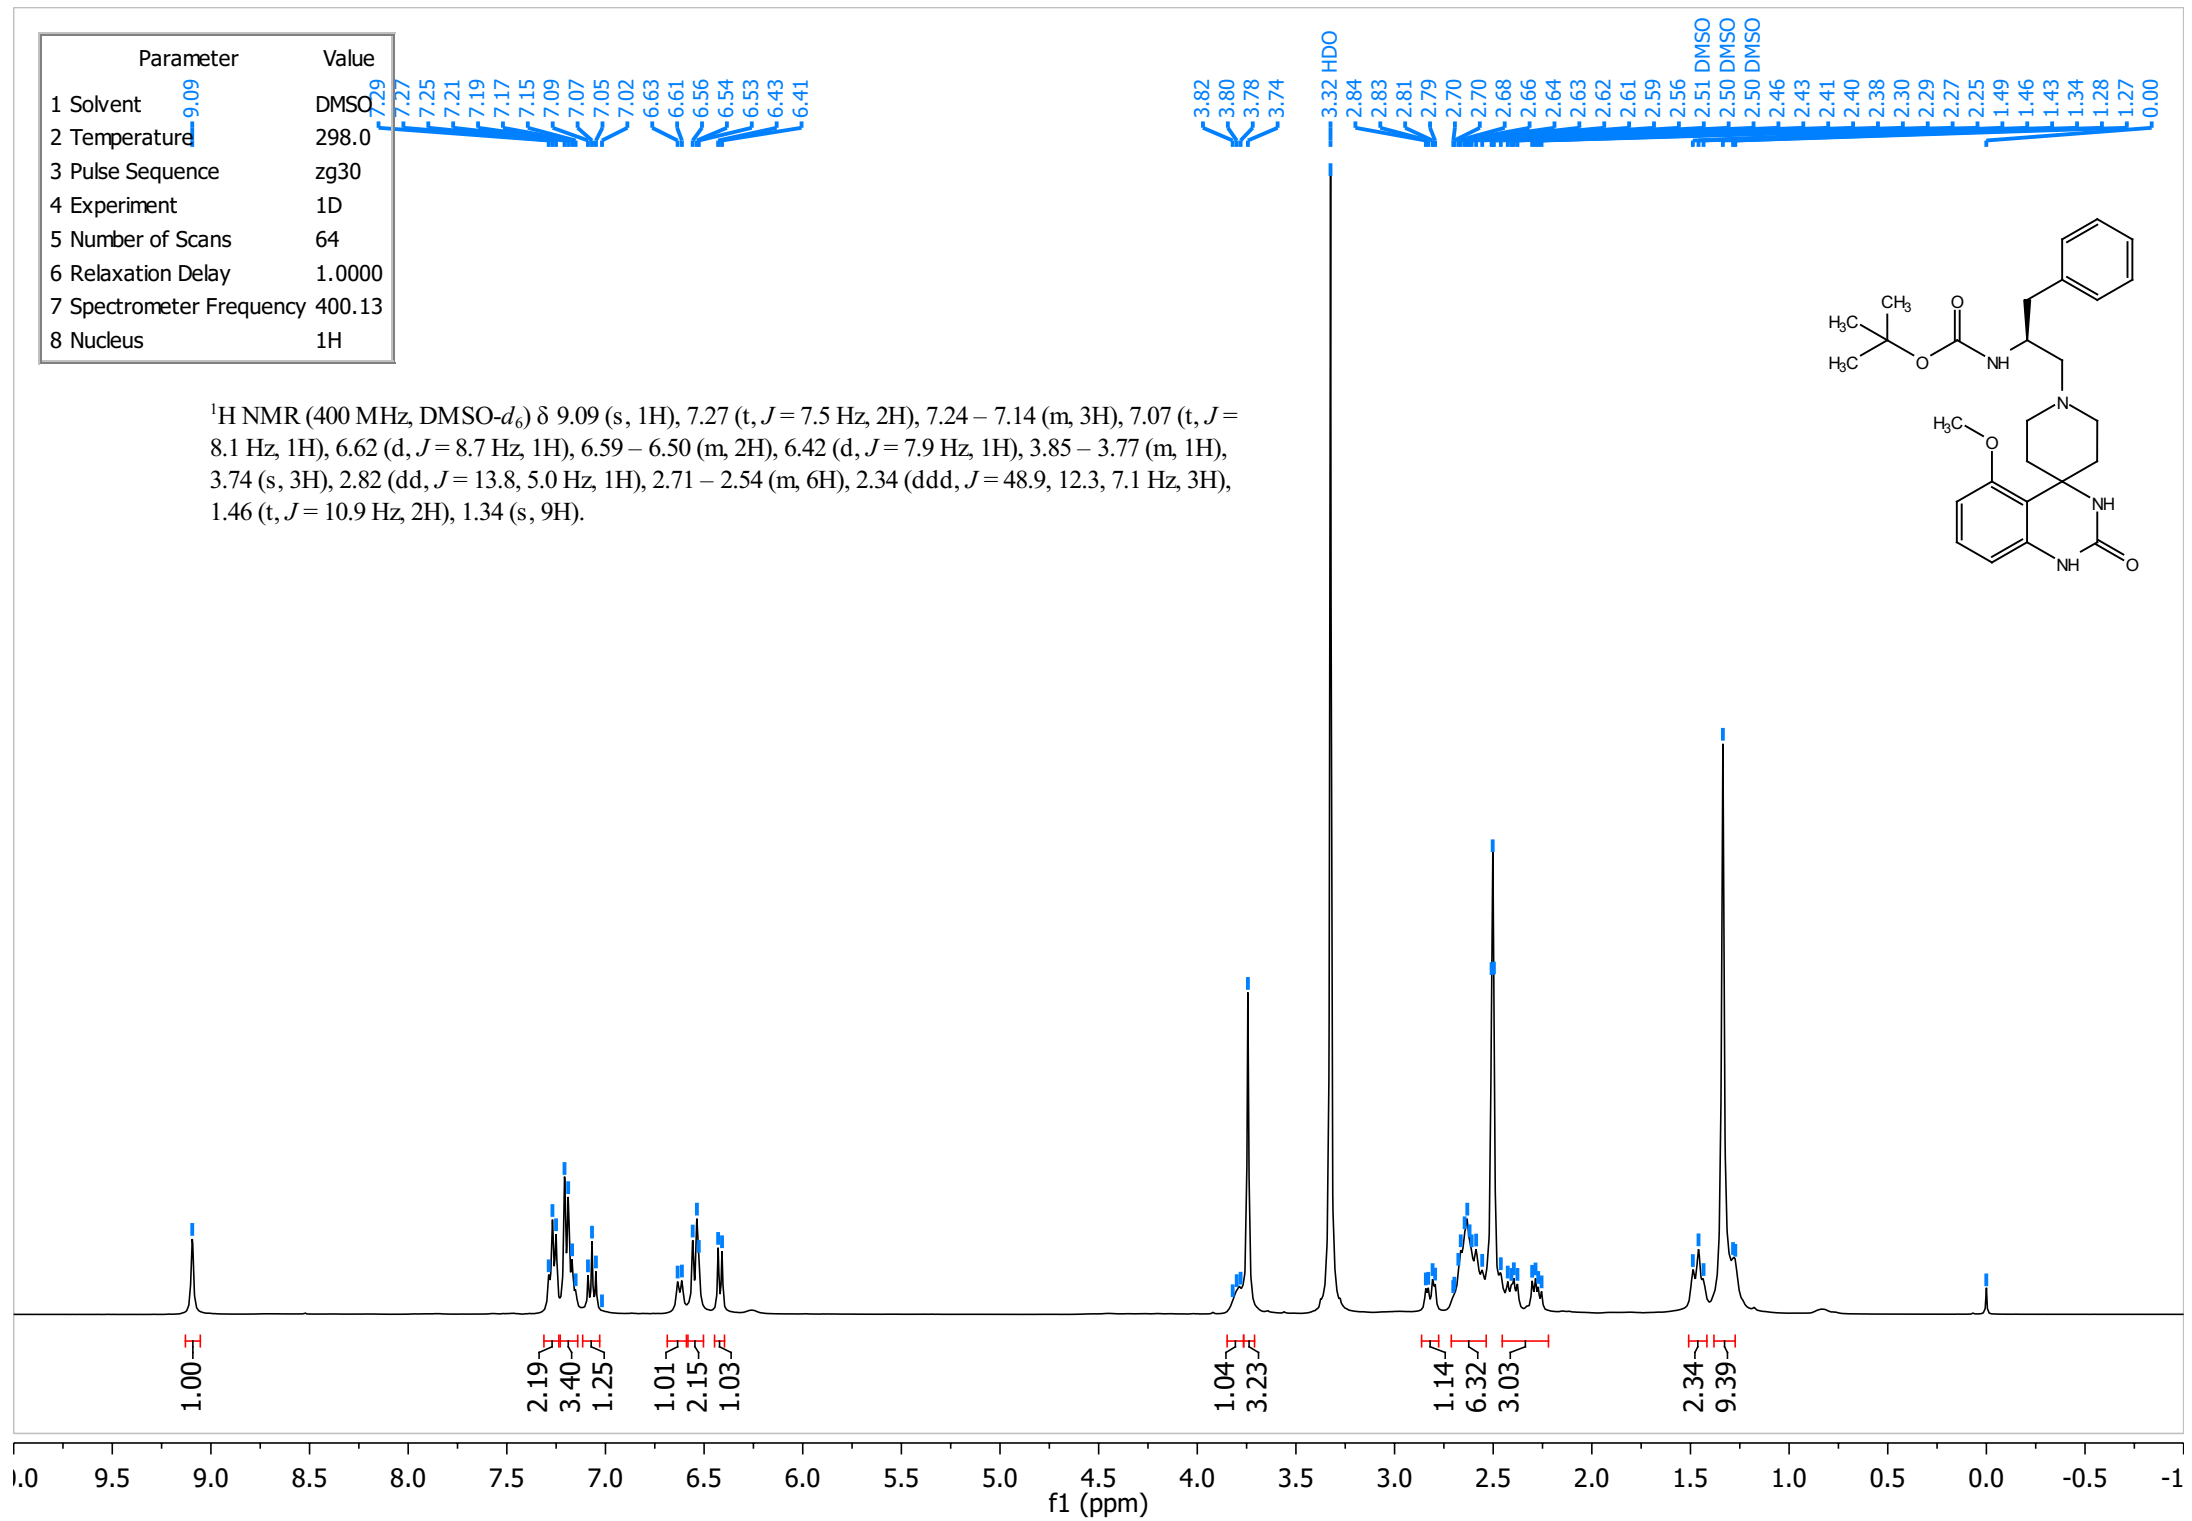

| Parameter                | Value           |
|--------------------------|-----------------|
| 1 Solvent                | DMSO            |
| 2 Temperature            | 298.0           |
| 3 Pulse Sequence         | zgpg30          |
| 4 Experiment             | 1D              |
| 5 Number of Scans        | 256             |
| 6 Relaxation Delay       | 2.0000          |
| 7 Spectrometer Frequency | 100.61          |
| 8 Nucleus                | <sup>13</sup> C |

<sup>13</sup>C NMR (101 MHz, DMSO-*d*<sub>6</sub>) δ 157.13, 155.67, 151.93, 139.93, 138.72, 129.55, 129.04, 128.49, 126.24, 113.15, 107.96, 105.72, 77.77, 61.72, 55.98, 55.40, 49.75, 47.71, 47.58, 35.46, 28.75.

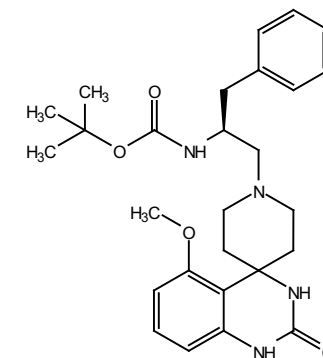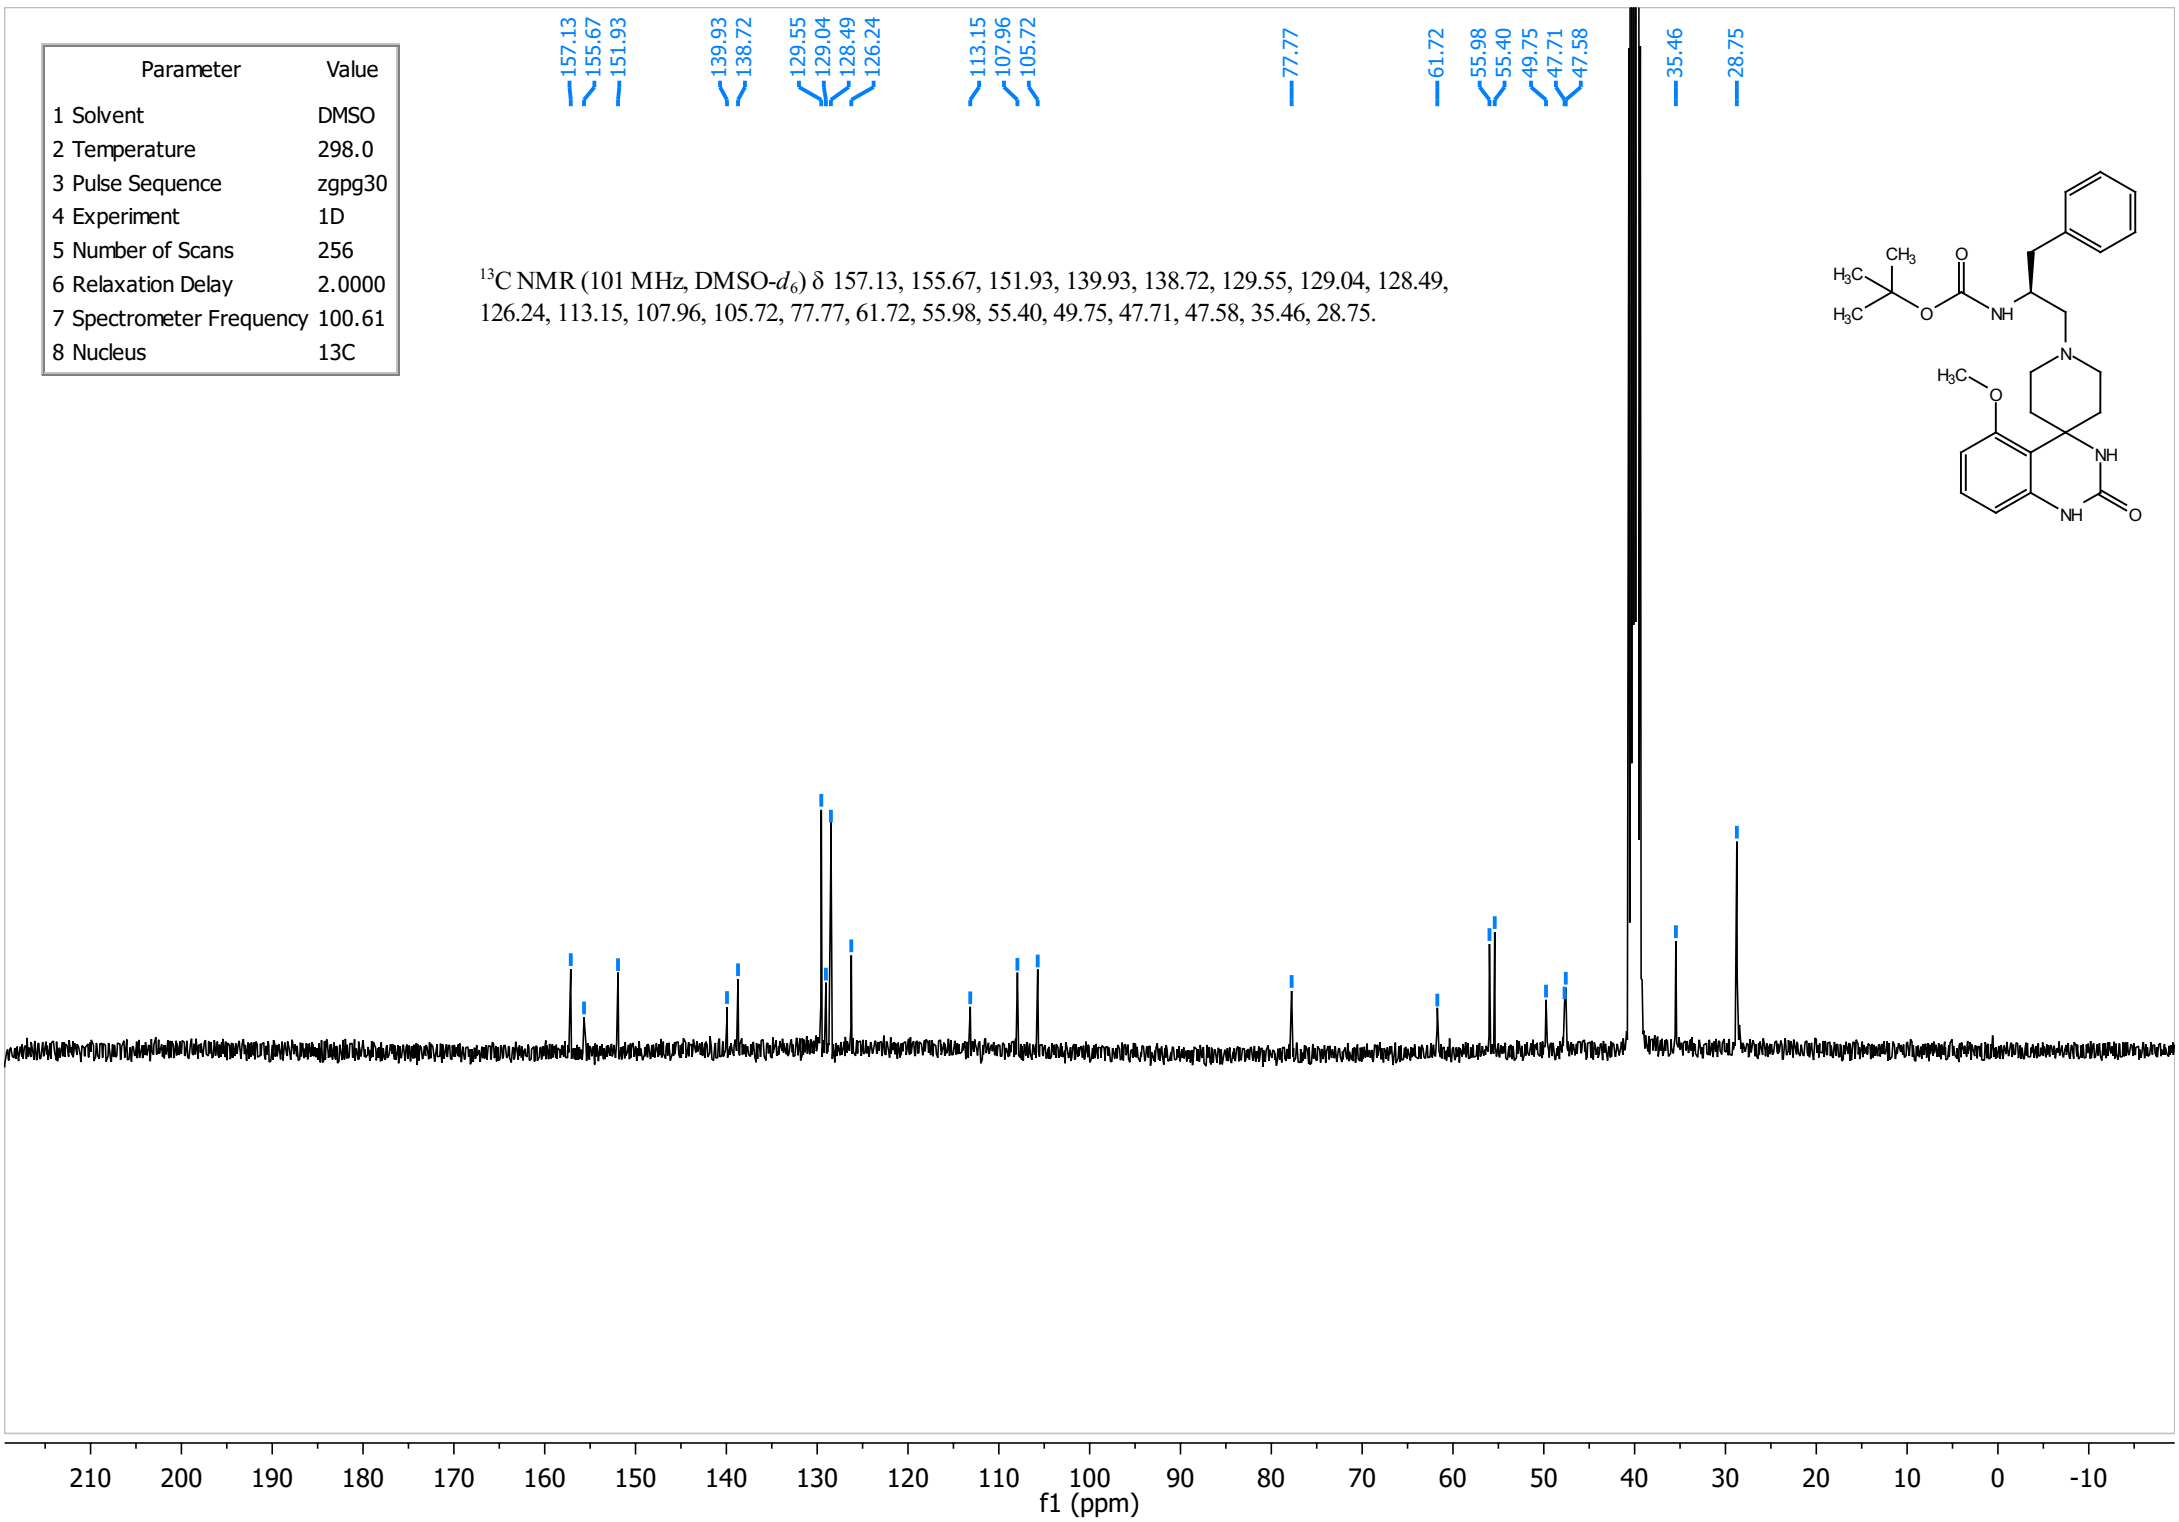

| Parameter                | Value  |
|--------------------------|--------|
| 1 Solvent                | DMSO   |
| 2 Temperature            | 298.0  |
| 3 Pulse Sequence         | zg30   |
| 4 Experiment             | 1D     |
| 5 Number of Scans        | 64     |
| 6 Relaxation Delay       | 1.0000 |
| 7 Spectrometer Frequency | 400.13 |
| 8 Nucleus                | 1H     |

<sup>1</sup>H NMR (400 MHz, DMSO-*d*<sub>6</sub>) δ 9.54 (s, 1H), 8.99 (s, 1H), 8.31 (d, *J* = 8.4 Hz, 1H), 7.80 (ddd, *J* = 11.5, 7.8, 2.1 Hz, 1H), 7.67 (dt, *J* = 10.4, 3.6 Hz, 1H), 7.54 (dt, *J* = 10.5, 8.3 Hz, 1H), 7.25 (d, *J* = 6.3 Hz, 4H), 7.16 (td, *J* = 6.1, 2.7 Hz, 1H), 6.88 (t, *J* = 7.9 Hz, 1H), 6.49 (s, 1H), 6.33 (d, *J* = 8.0 Hz, 1H), 6.24 (d, *J* = 7.9 Hz, 1H), 4.39 – 4.31 (m, 1H), 2.97 (dd, *J* = 13.7, 4.8 Hz, 1H), 2.78 (dd, *J* = 13.9, 8.8 Hz, 4H), 2.71 – 2.62 (m, 2H), 2.61 – 2.51 (m, 3H), 2.45 (d, *J* = 5.3 Hz, 1H), 1.45 (t, *J* = 12.5 Hz, 2H).

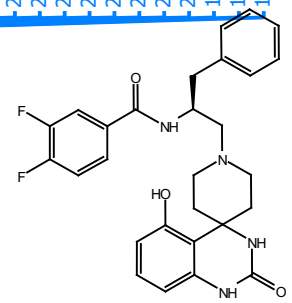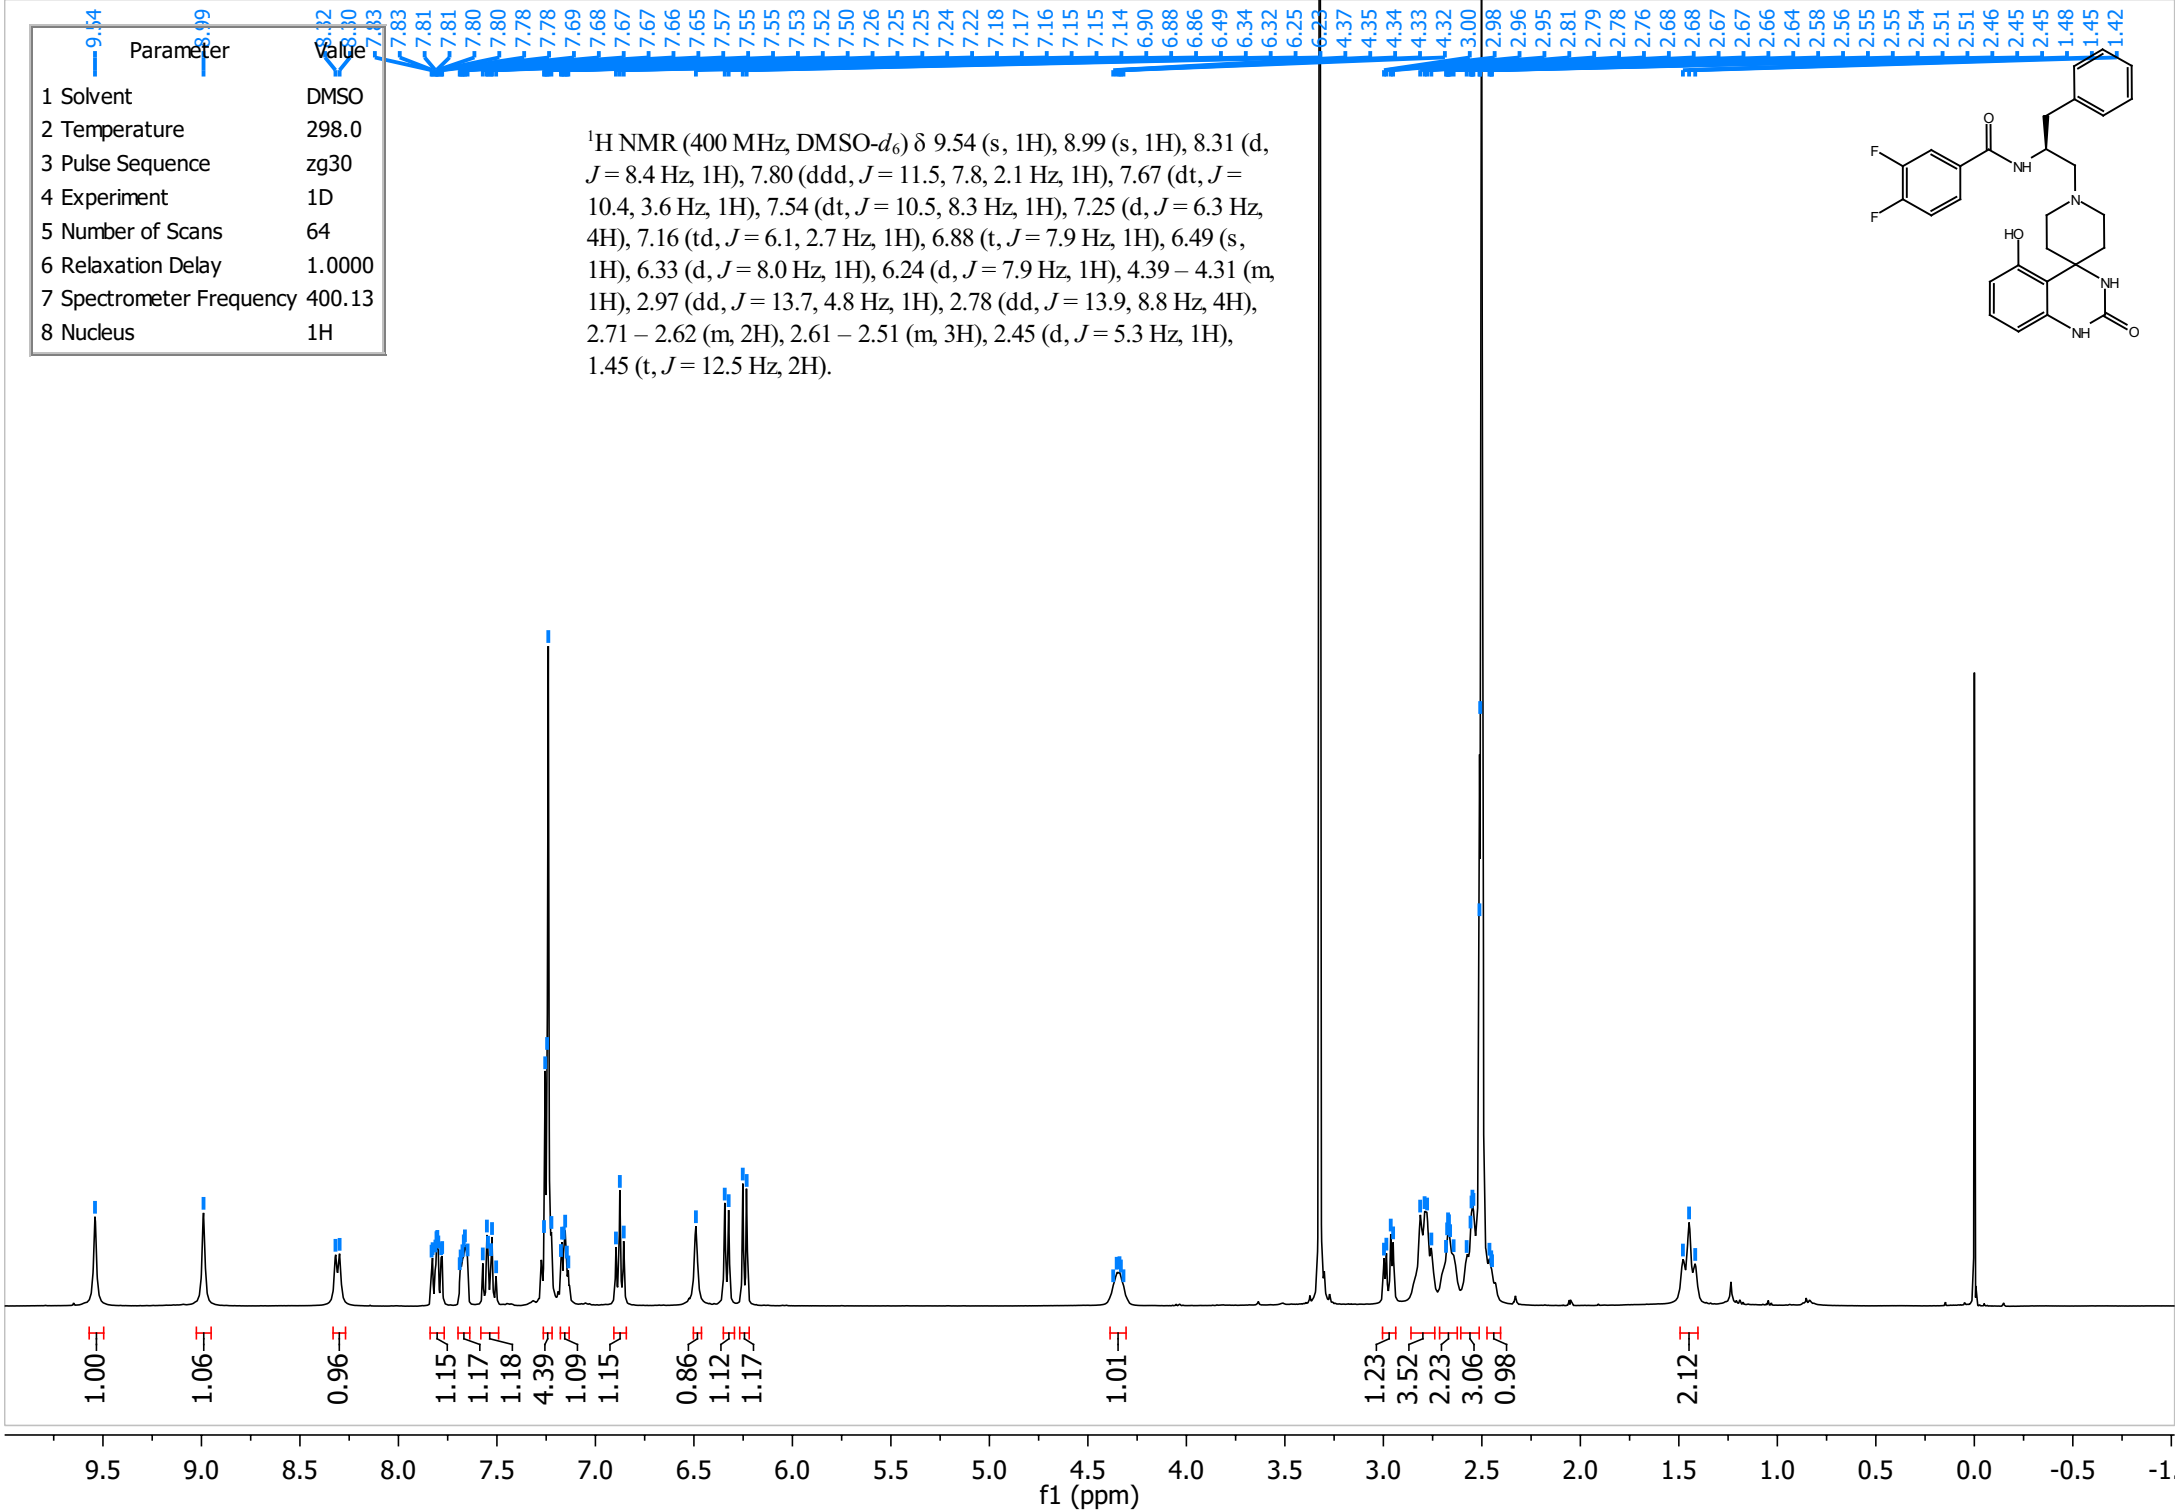

| Parameter                | Value           |
|--------------------------|-----------------|
| 1 Solvent                | DMSO            |
| 2 Temperature            | 298.0           |
| 3 Pulse Sequence         | zgpg30          |
| 4 Experiment             | 1D              |
| 5 Number of Scans        | 1024            |
| 6 Relaxation Delay       | 2.0000          |
| 7 Spectrometer Frequency | 100.61          |
| 8 Nucleus                | <sup>13</sup> C |

<sup>13</sup>C NMR (101 MHz, DMSO-*d*<sub>6</sub>) δ 164.13, 154.95, 151.98, 148.25, 139.69, 138.79, 132.72, 129.57, 128.58, 126.40, 125.07, 118.03, 117.85, 117.08, 116.90, 111.59, 110.01, 105.92, 61.56, 55.10, 49.35, 47.92, 47.64, 38.78, 35.34.

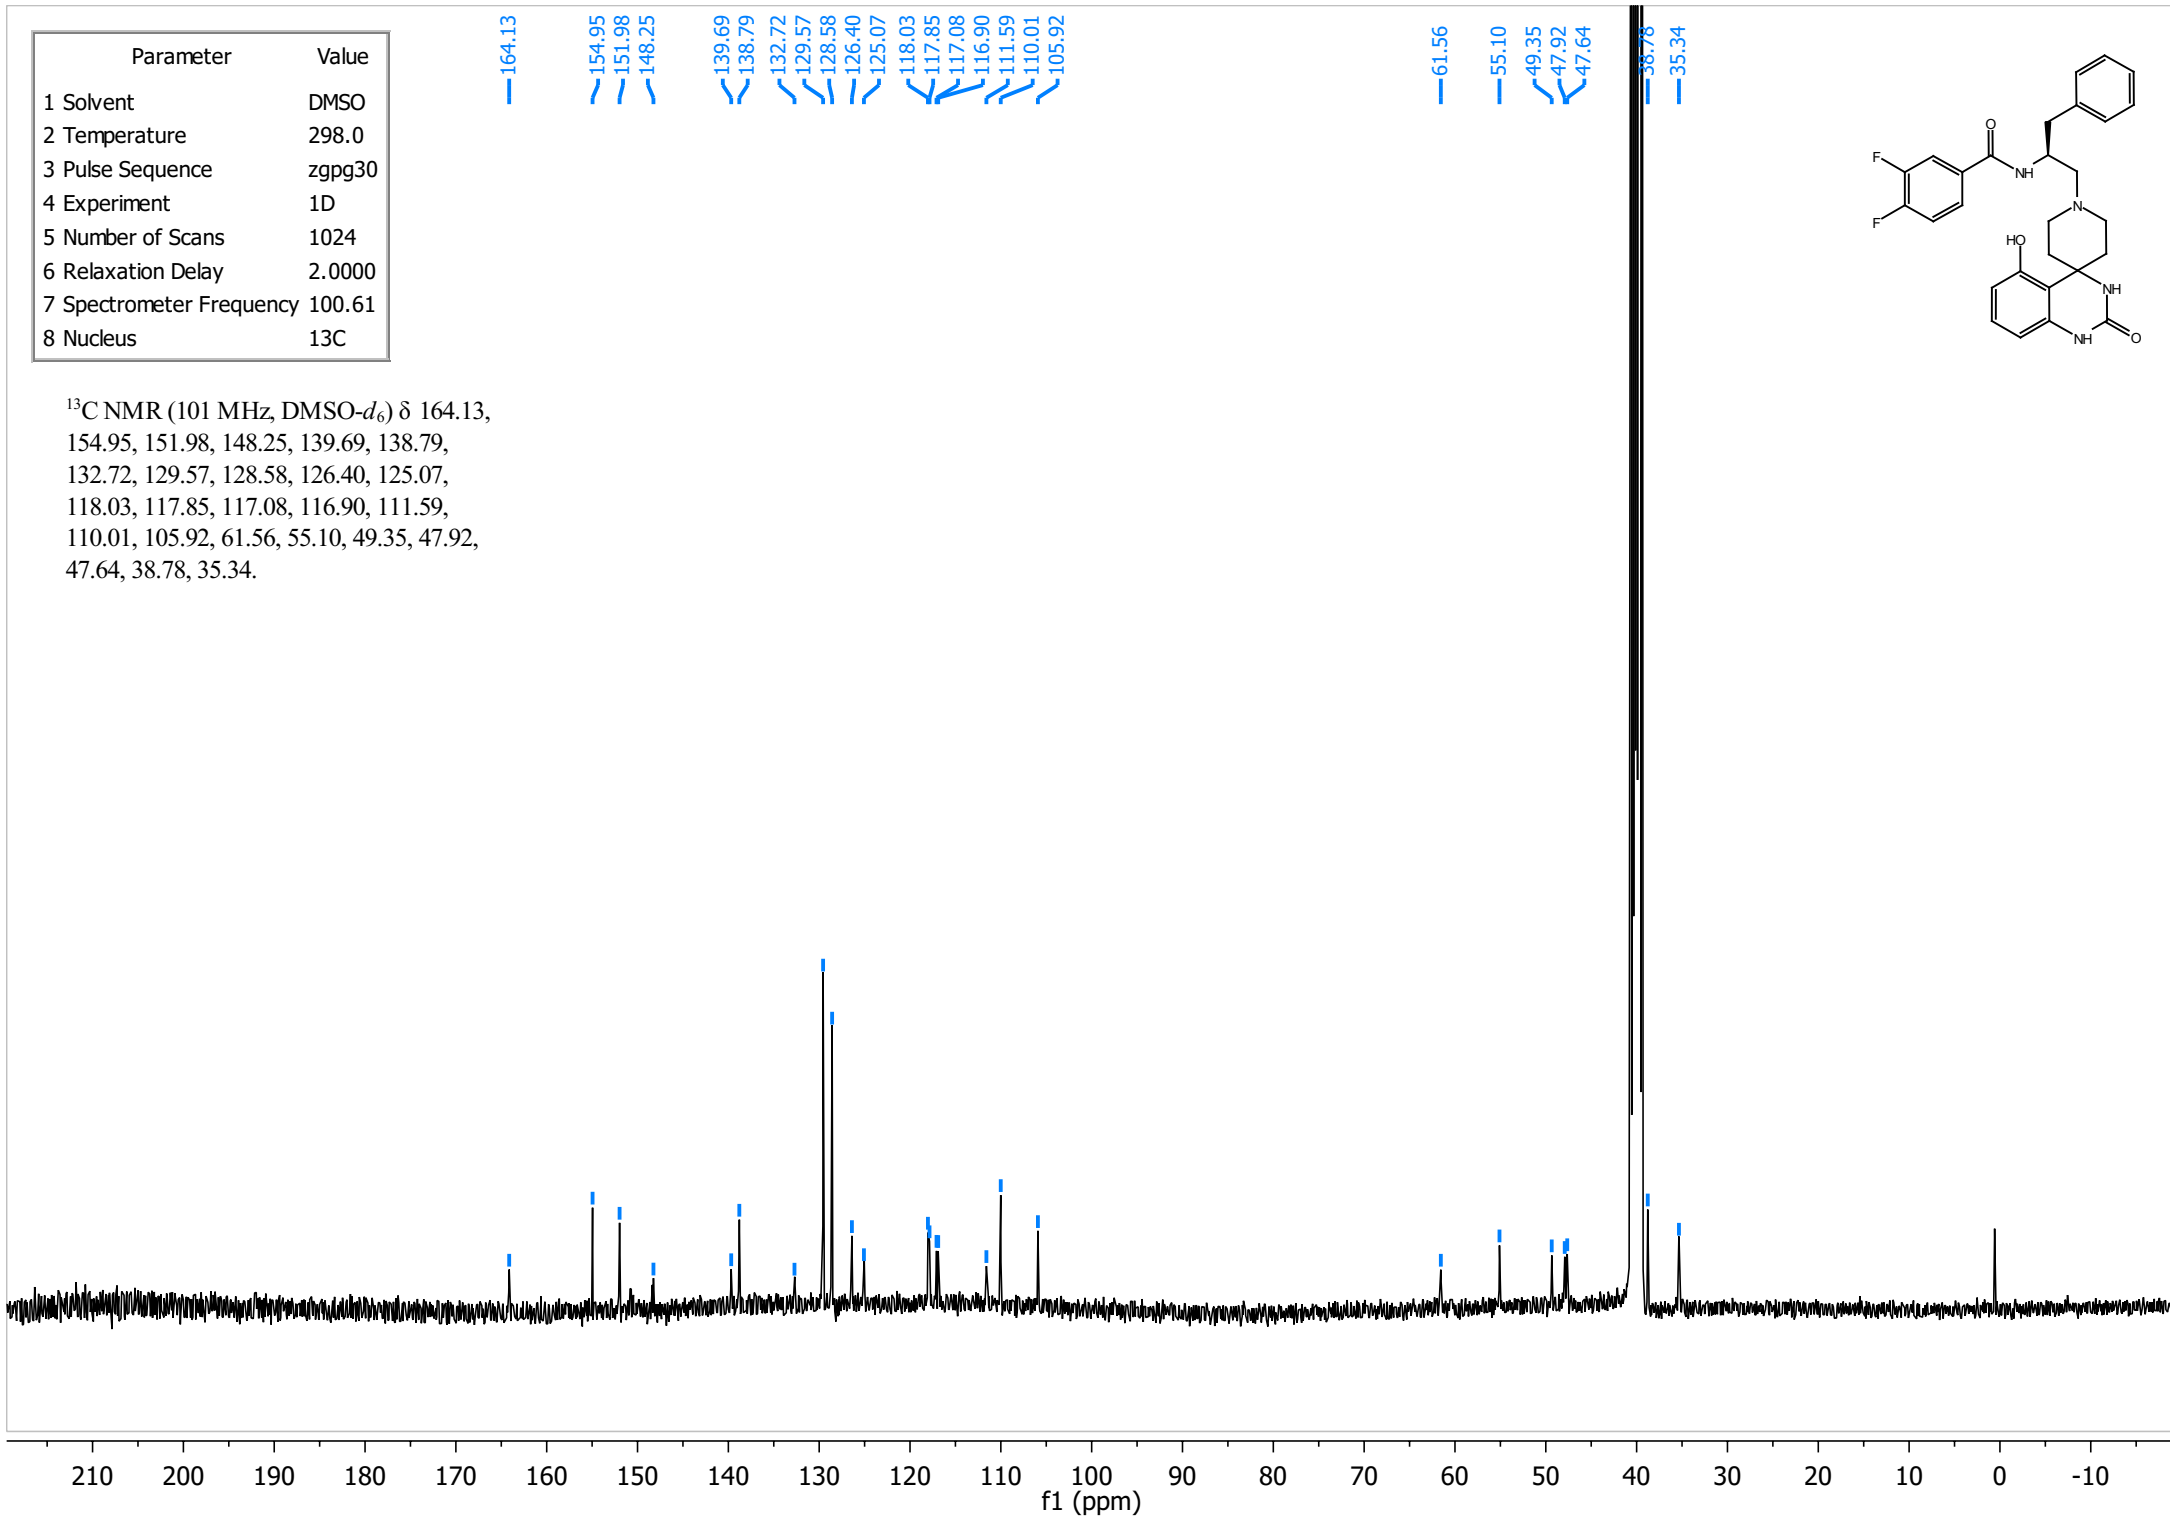

| Parameter                | Value           |
|--------------------------|-----------------|
| 1 Solvent                | DMSO            |
| 2 Temperature            | 298.0           |
| 3 Pulse Sequence         | zgfhigqn.2      |
| 4 Experiment             | 1D              |
| 5 Number of Scans        | 64              |
| 6 Relaxation Delay       | 1.0000          |
| 7 Spectrometer Frequency | 376.50          |
| 8 Nucleus                | <sup>19</sup> F |

<sup>19</sup>F NMR (376 MHz, DMSO-*d*<sub>6</sub>) δ -135.08 (d, *J* = 22.0 Hz),  
-138.11 (d, *J* = 22.1 Hz).

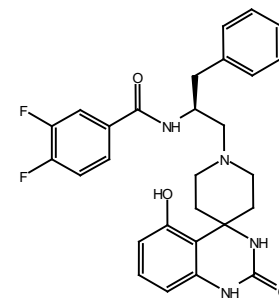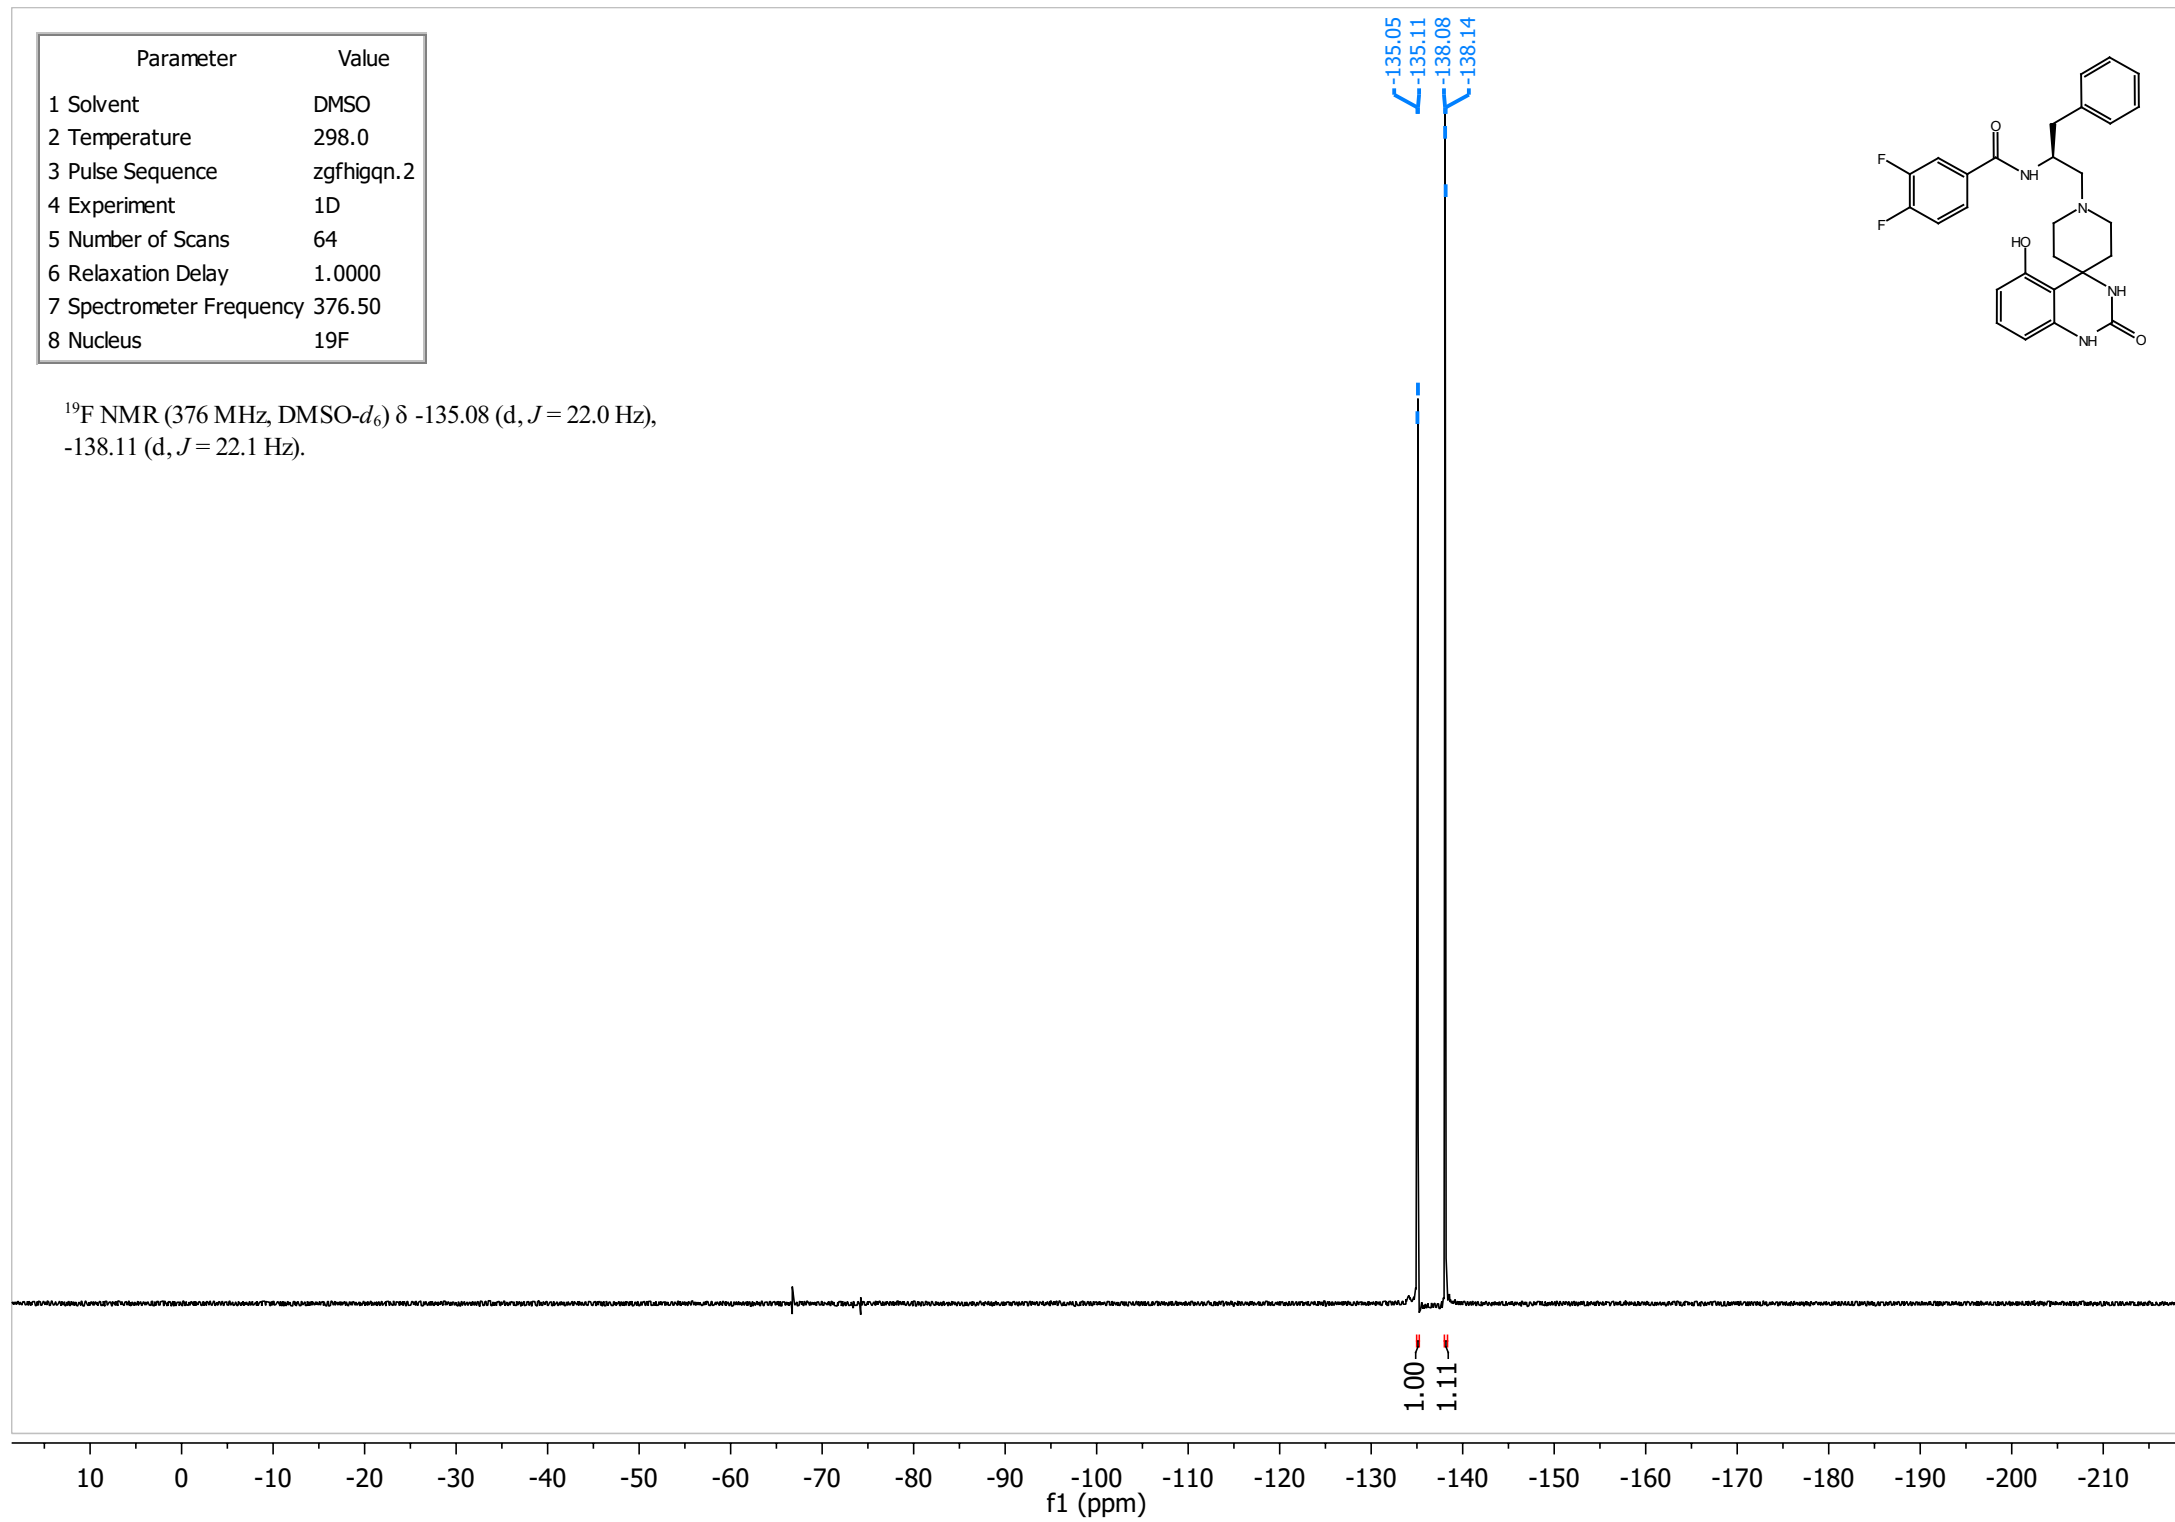

| Parameter                | Value          |
|--------------------------|----------------|
| 1 Solvent                | DMSO           |
| 2 Temperature            | 298.0          |
| 3 Pulse Sequence         | zg30           |
| 4 Experiment             | 1D             |
| 5 Number of Scans        | 16             |
| 6 Relaxation Delay       | 1.0000         |
| 7 Spectrometer Frequency | 400.13         |
| 8 Nucleus                | <sup>1</sup> H |

<sup>1</sup>H NMR (400 MHz, DMSO-*d*<sub>6</sub>) δ 7.90 – 7.79 (m, 4H), 7.37 – 7.29 (m, 2H), 7.23 – 7.15 (m, 3H), 3.55 (q, *J* = 7.1 Hz, 4H), 1.55 (p, *J* = 7.0 Hz, 2H), 1.41 (q, *J* = 7.3 Hz, 2H), 1.35 (s, 9H), 1.25 (dd, *J* = 7.1, 3.5 Hz, 4H).

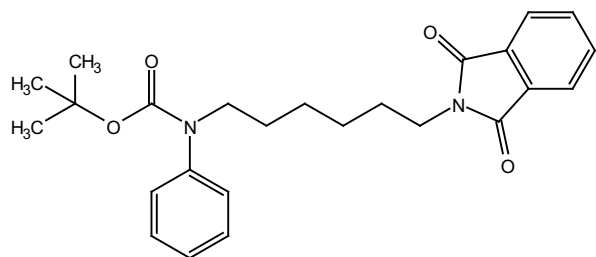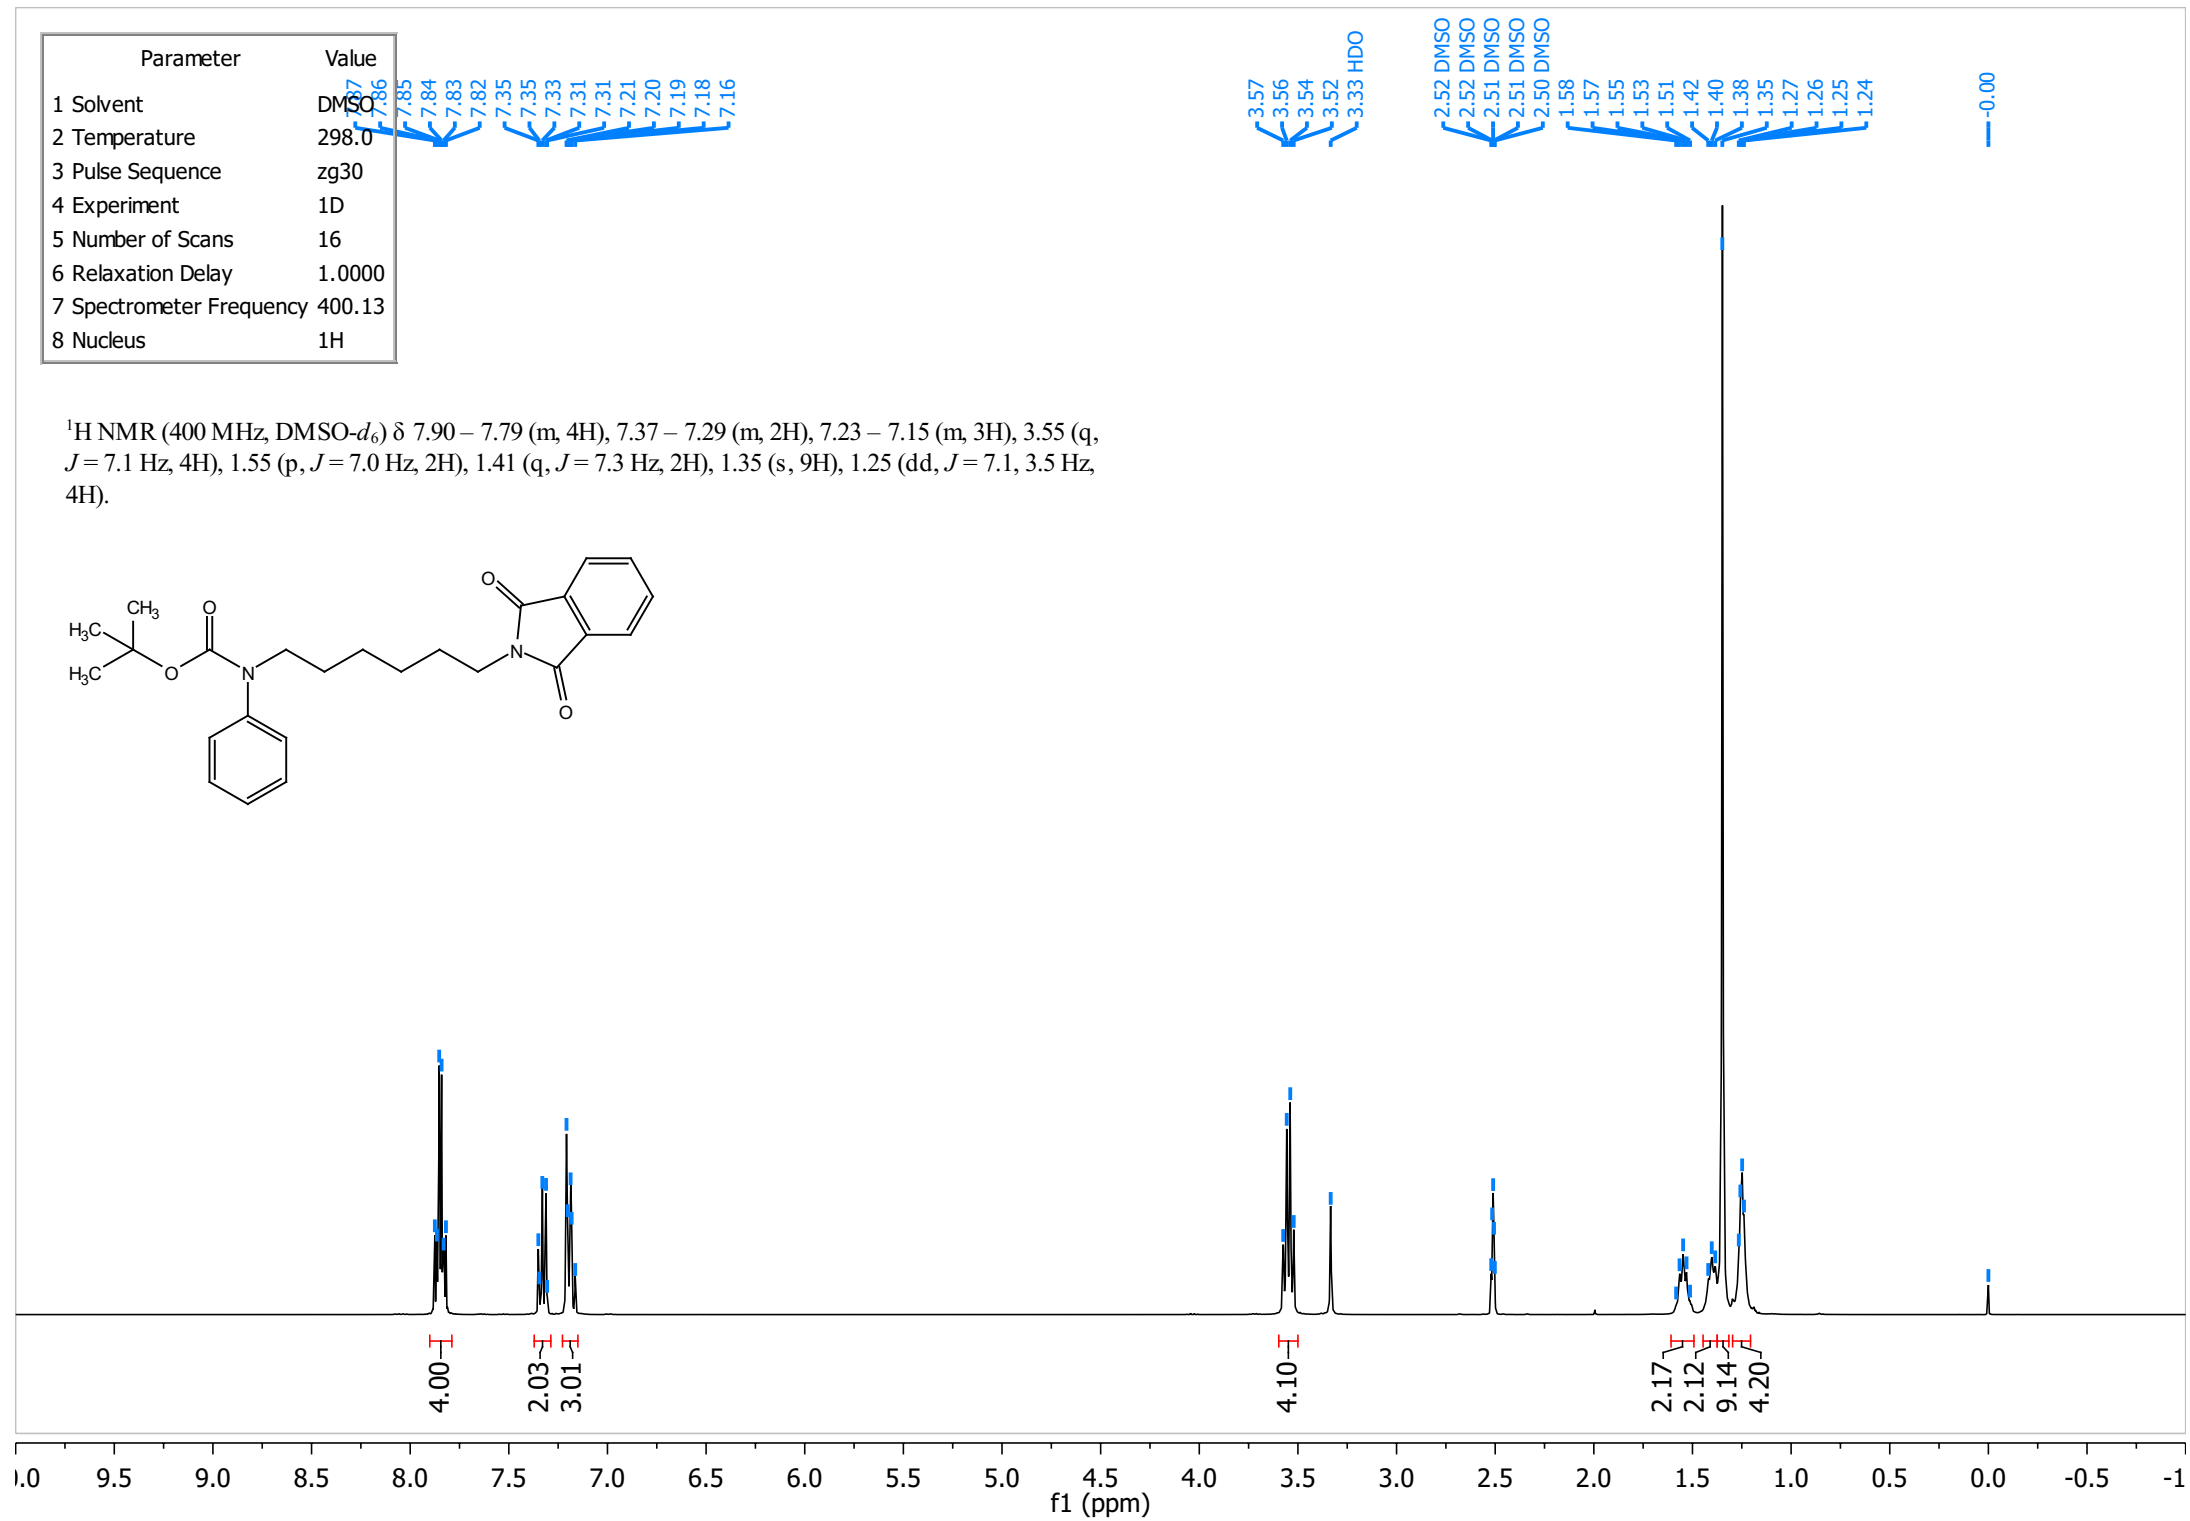

| Parameter                | Value           |
|--------------------------|-----------------|
| 1 Solvent                | DMSO            |
| 2 Temperature            | 298.0           |
| 3 Pulse Sequence         | zgpg30          |
| 4 Experiment             | 1D              |
| 5 Number of Scans        | 256             |
| 6 Relaxation Delay       | 2.0000          |
| 7 Spectrometer Frequency | 100.61          |
| 8 Nucleus                | <sup>13</sup> C |

<sup>13</sup>C NMR (101 MHz, DMSO-*d*<sub>6</sub>) δ 168.39, 154.14, 142.58, 134.81, 132.08, 129.08, 127.32, 126.20, 123.45, 79.62, 49.42, 37.75, 28.38, 28.36, 28.13, 26.34, 26.05.

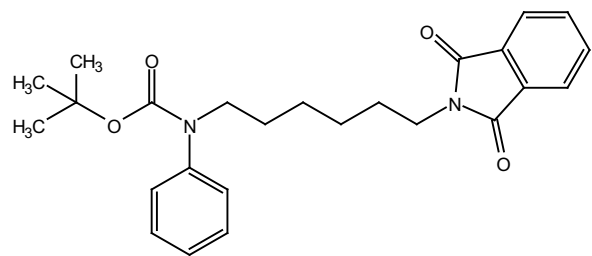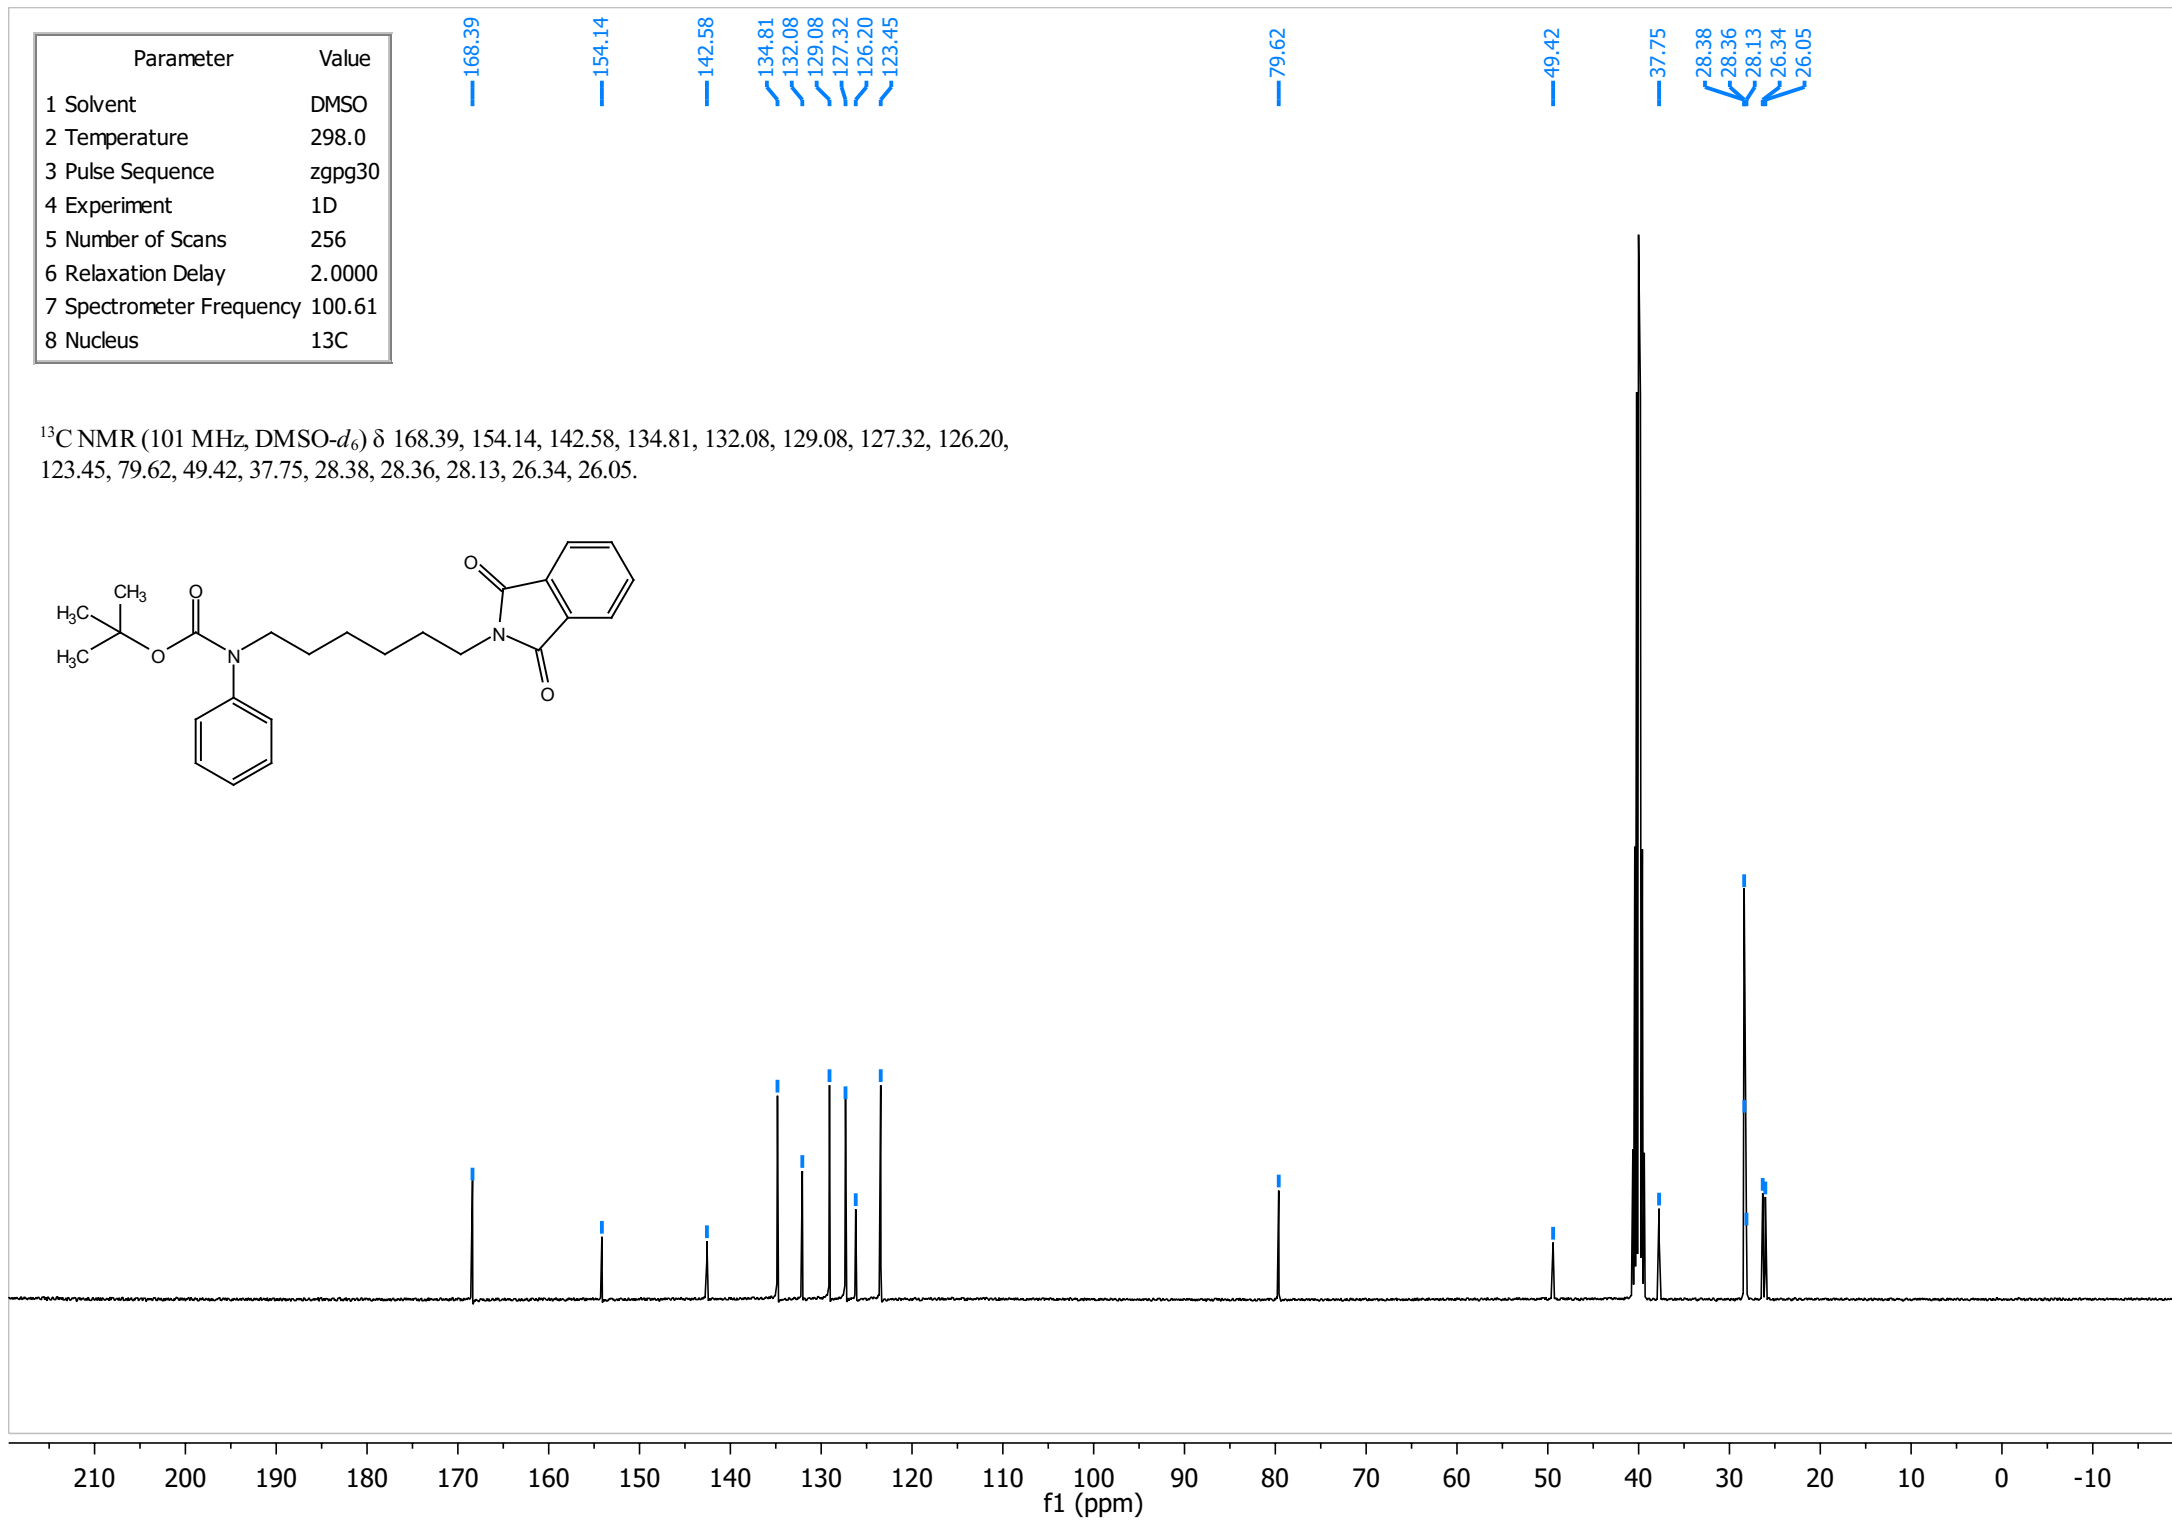





| Parameter                | Value  |
|--------------------------|--------|
| 1 Solvent                | DMSO   |
| 2 Temperature            | 298.0  |
| 3 Pulse Sequence         | zgpg30 |
| 4 Experiment             | 1D     |
| 5 Number of Scans        | 2056   |
| 6 Relaxation Delay       | 2.0000 |
| 7 Spectrometer Frequency | 100.62 |
| 8 Nucleus                | 13C    |

<sup>13</sup>C NMR (101 MHz, DMSO-*d*<sub>6</sub>)  
 $\delta$  167.93, 153.19, 138.67, 137.23,  
134.35, 131.61, 129.33, 128.79,  
128.15, 127.92, 126.82, 123.42,  
122.98, 121.65, 113.18, 62.01,  
52.32, 47.38, 40.69, 37.32, 36.16,  
27.92, 26.55, 25.98, 25.88.

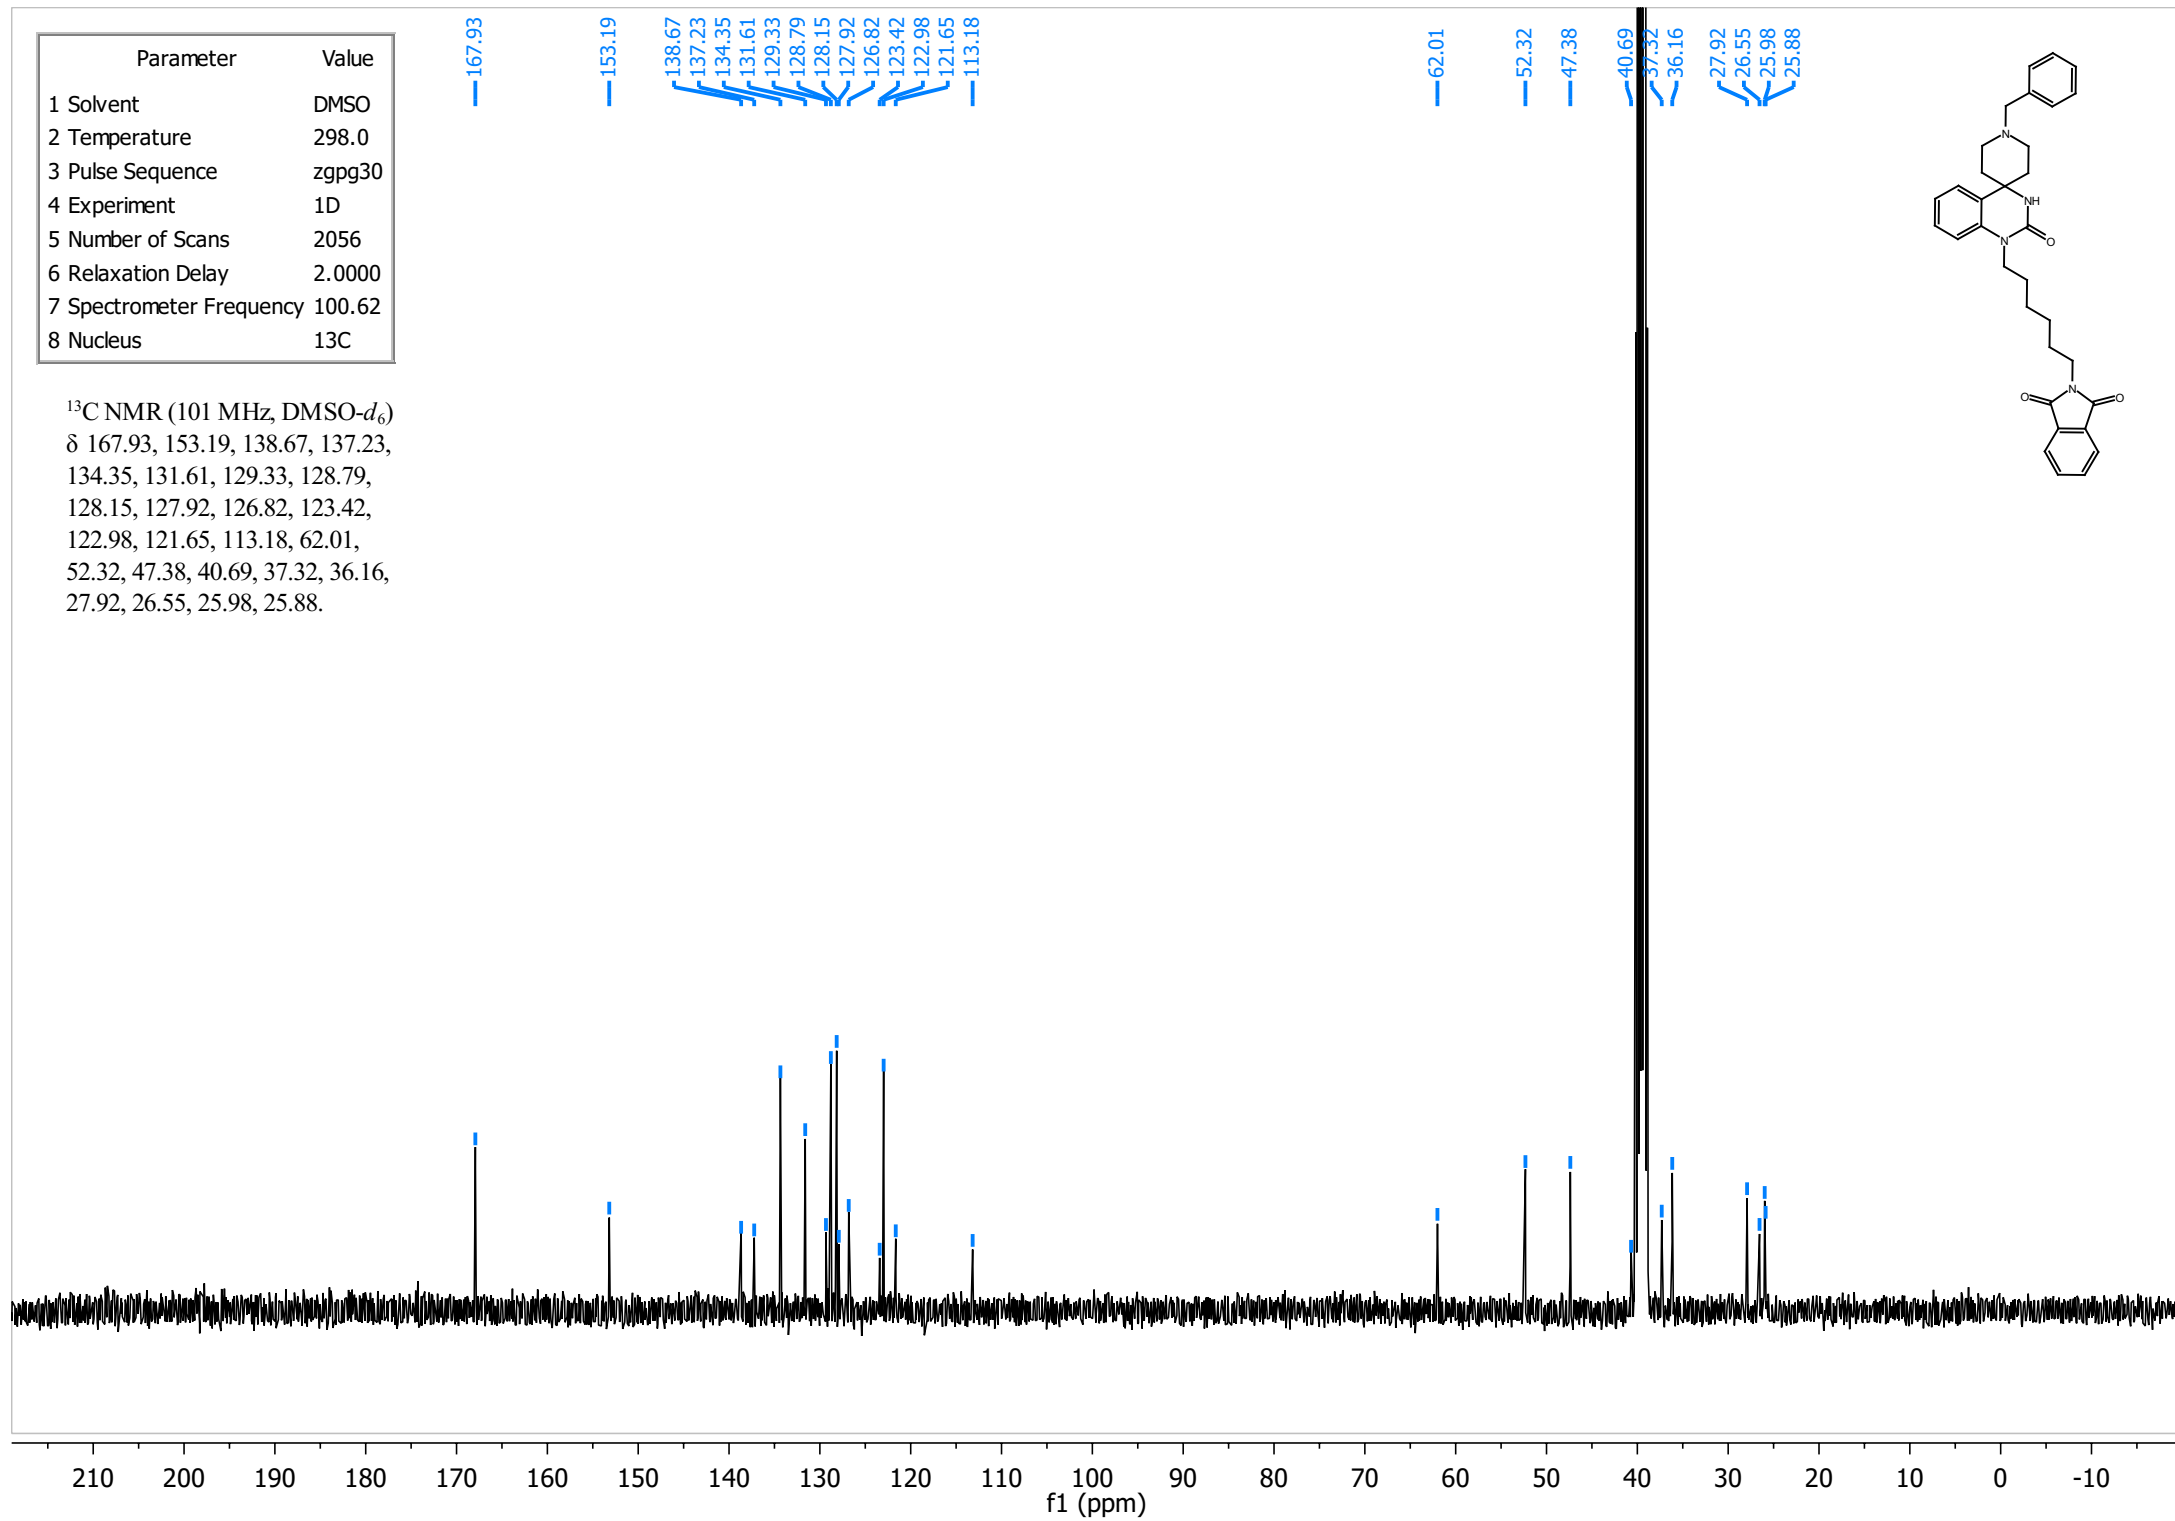

| Parameter                | Value          |
|--------------------------|----------------|
| 1 Solvent                | DMSO           |
| 2 Temperature            | 298.0          |
| 3 Pulse Sequence         | zg30           |
| 4 Experiment             | 1D             |
| 5 Number of Scans        | 128            |
| 6 Relaxation Delay       | 1.0000         |
| 7 Spectrometer Frequency | 400.14         |
| 8 Nucleus                | <sup>1</sup> H |

<sup>1</sup>H NMR (400 MHz, DMSO-*d*<sub>6</sub>) δ 8.40 (s, 1H), 7.87 – 7.81 (m, 4H), 7.34 (s, 1H), 7.26 (t, *J* = 8.1 Hz, 2H), 6.99 (t, *J* = 7.9 Hz, 2H), 3.79 (t, *J* = 7.4 Hz, 2H), 3.55 (t, *J* = 7.1 Hz, 2H), 3.20 – 3.12 (m, 2H), 2.95 (d, *J* = 12.7 Hz, 2H), 2.01 (td, *J* = 13.5, 4.6 Hz, 2H), 1.70 (d, *J* = 13.3 Hz, 2H), 1.60 – 1.49 (m, 4H), 1.35 – 1.31 (m, 4H).

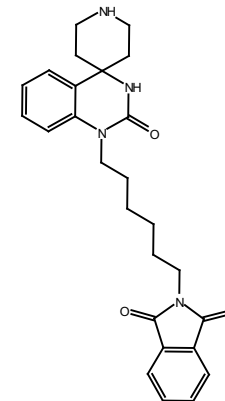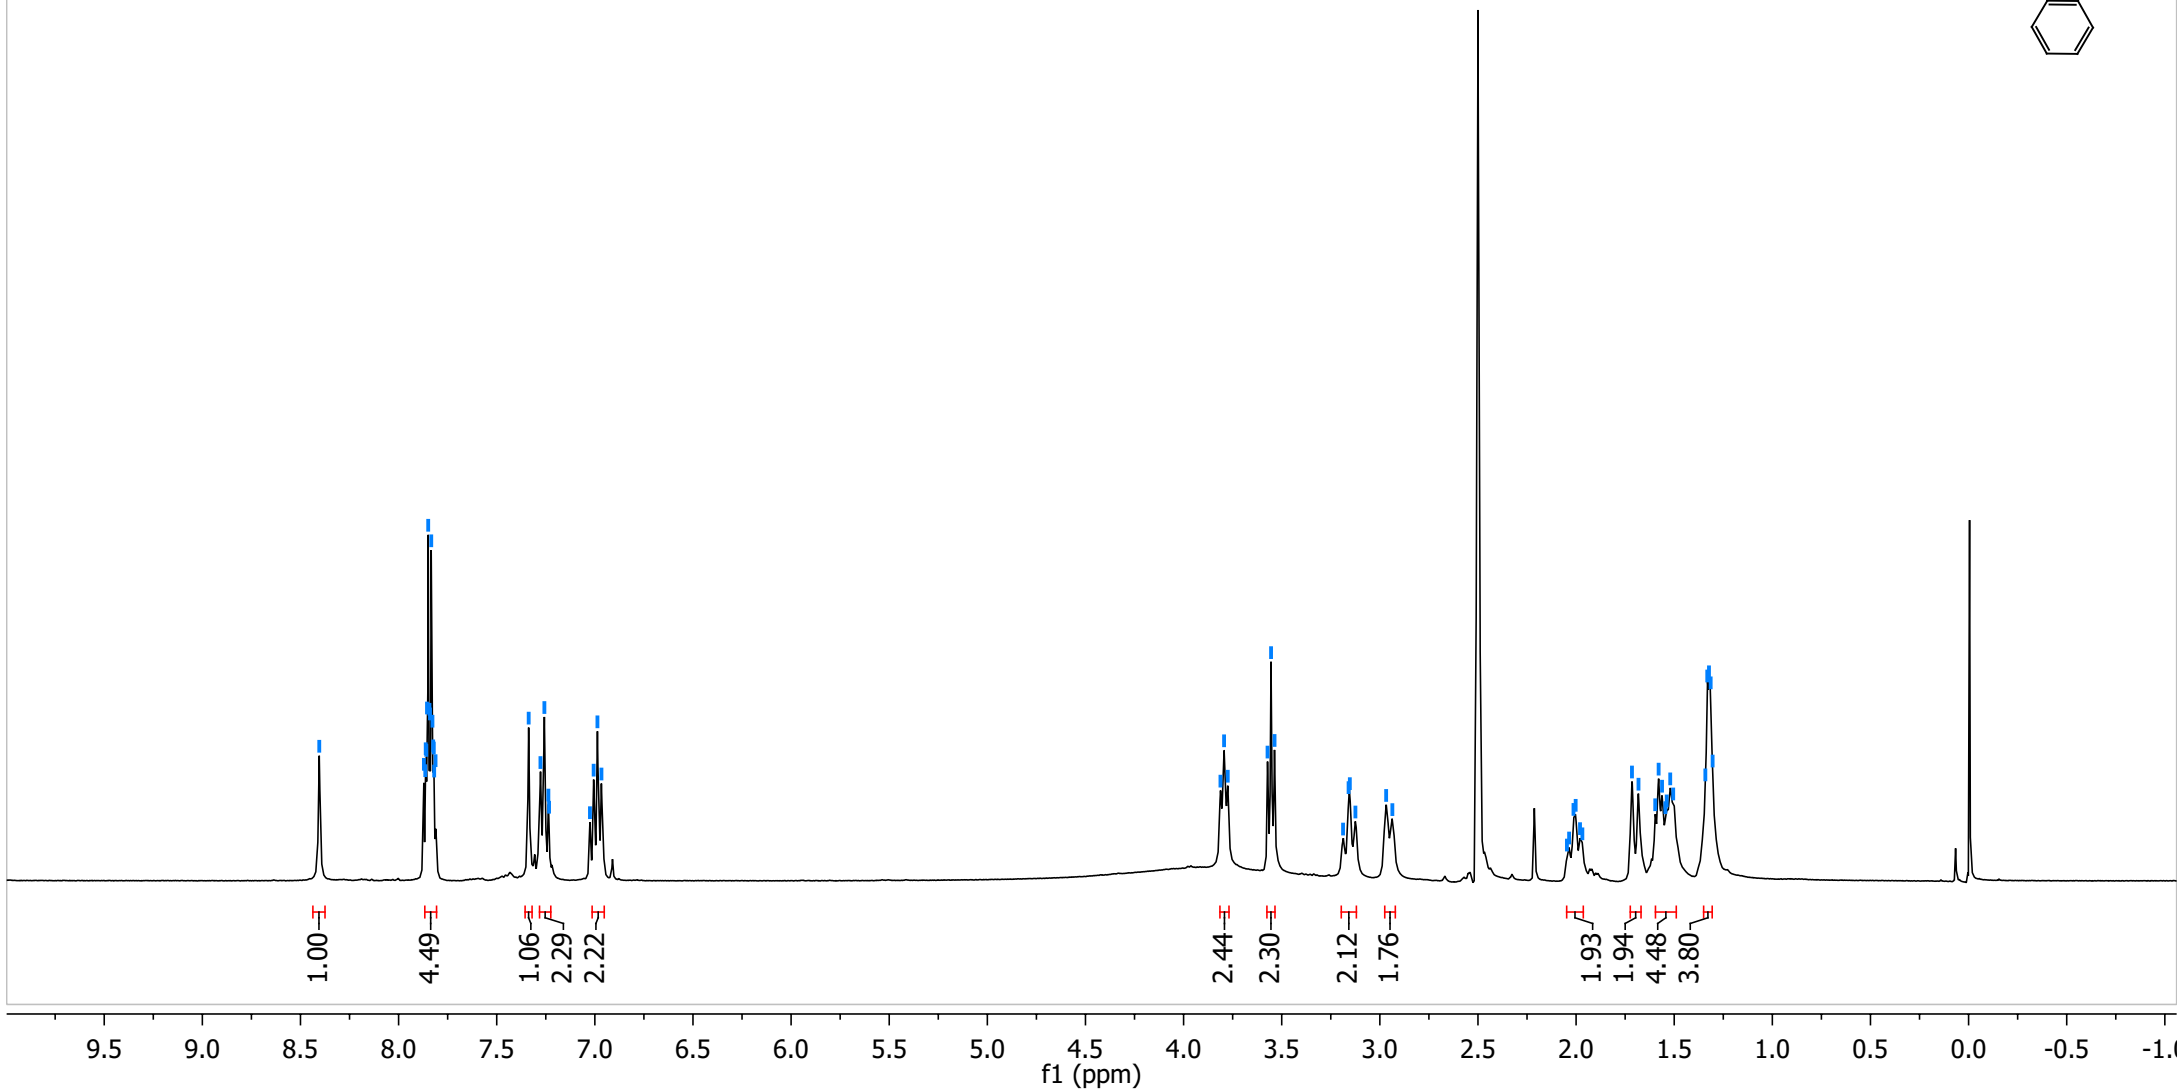

| Parameter                | Value           |
|--------------------------|-----------------|
| 1 Solvent                | DMSO            |
| 2 Temperature            | 298.0           |
| 3 Pulse Sequence         | zgpg30          |
| 4 Experiment             | 1D              |
| 5 Number of Scans        | 2056            |
| 6 Relaxation Delay       | 2.0000          |
| 7 Spectrometer Frequency | 100.62          |
| 8 Nucleus                | <sup>13</sup> C |

<sup>13</sup>C NMR (101 MHz, DMSO-*d*<sub>6</sub>) δ  
 167.96, 152.97, 136.96, 134.36,  
 131.62, 128.61, 128.20, 123.56,  
 122.99, 121.71, 113.30, 52.29, 40.75,  
 37.33, 35.27, 27.93, 26.55, 26.01,  
 25.87.

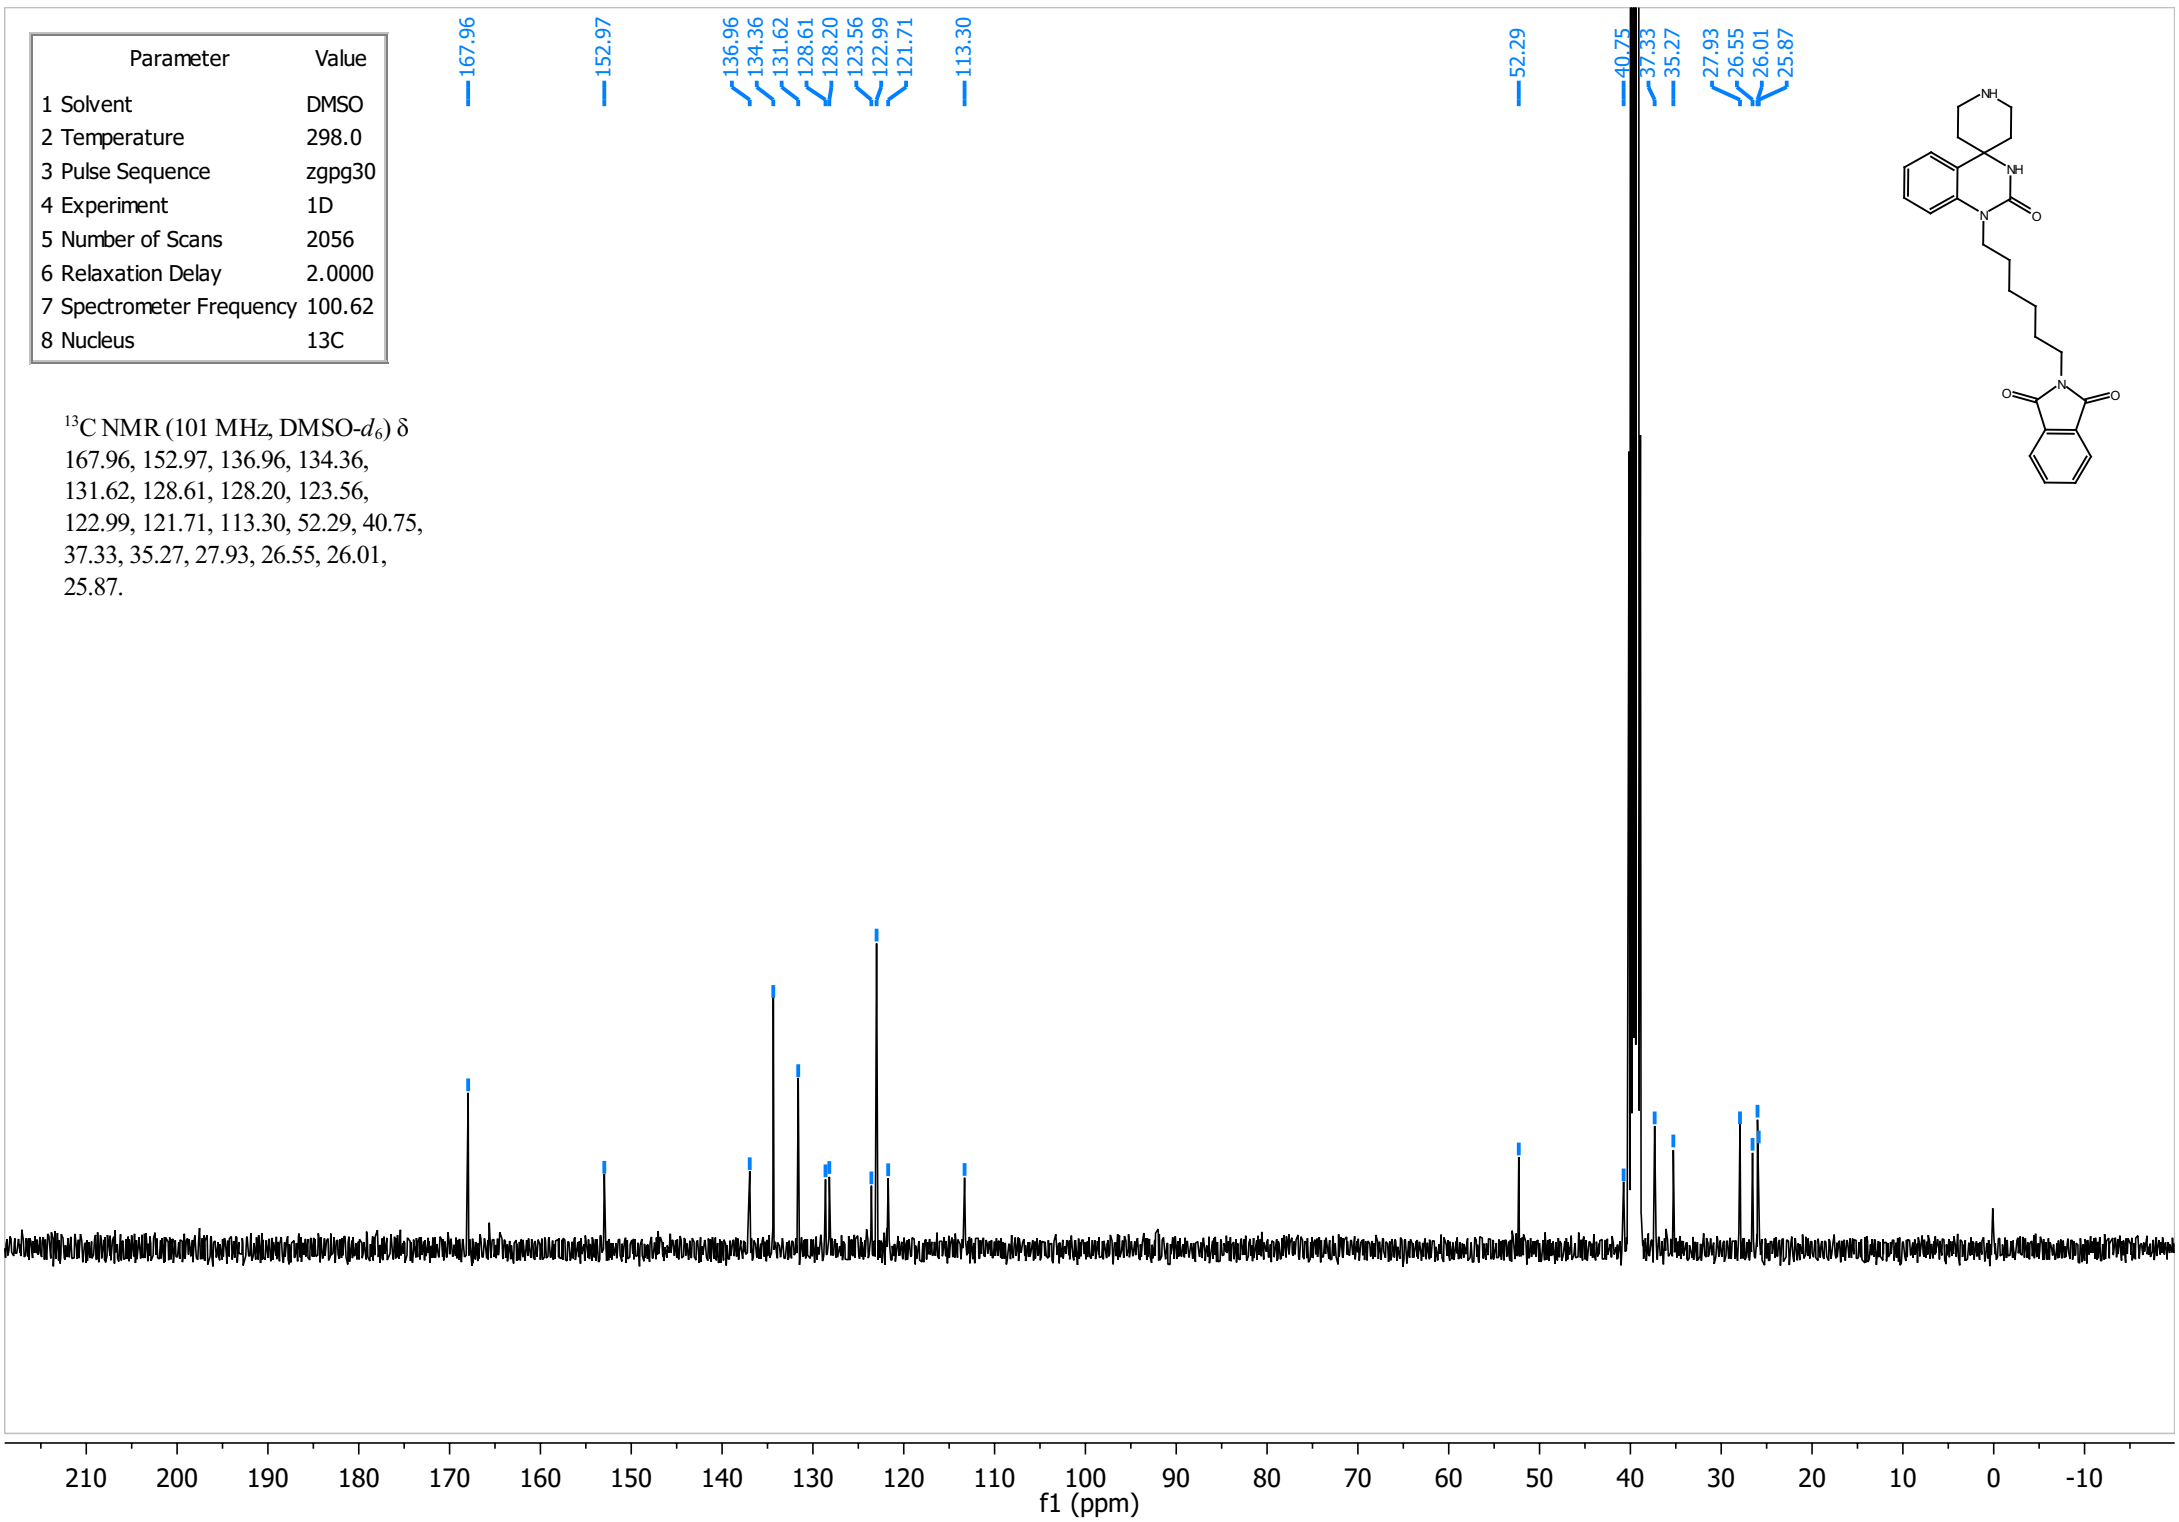

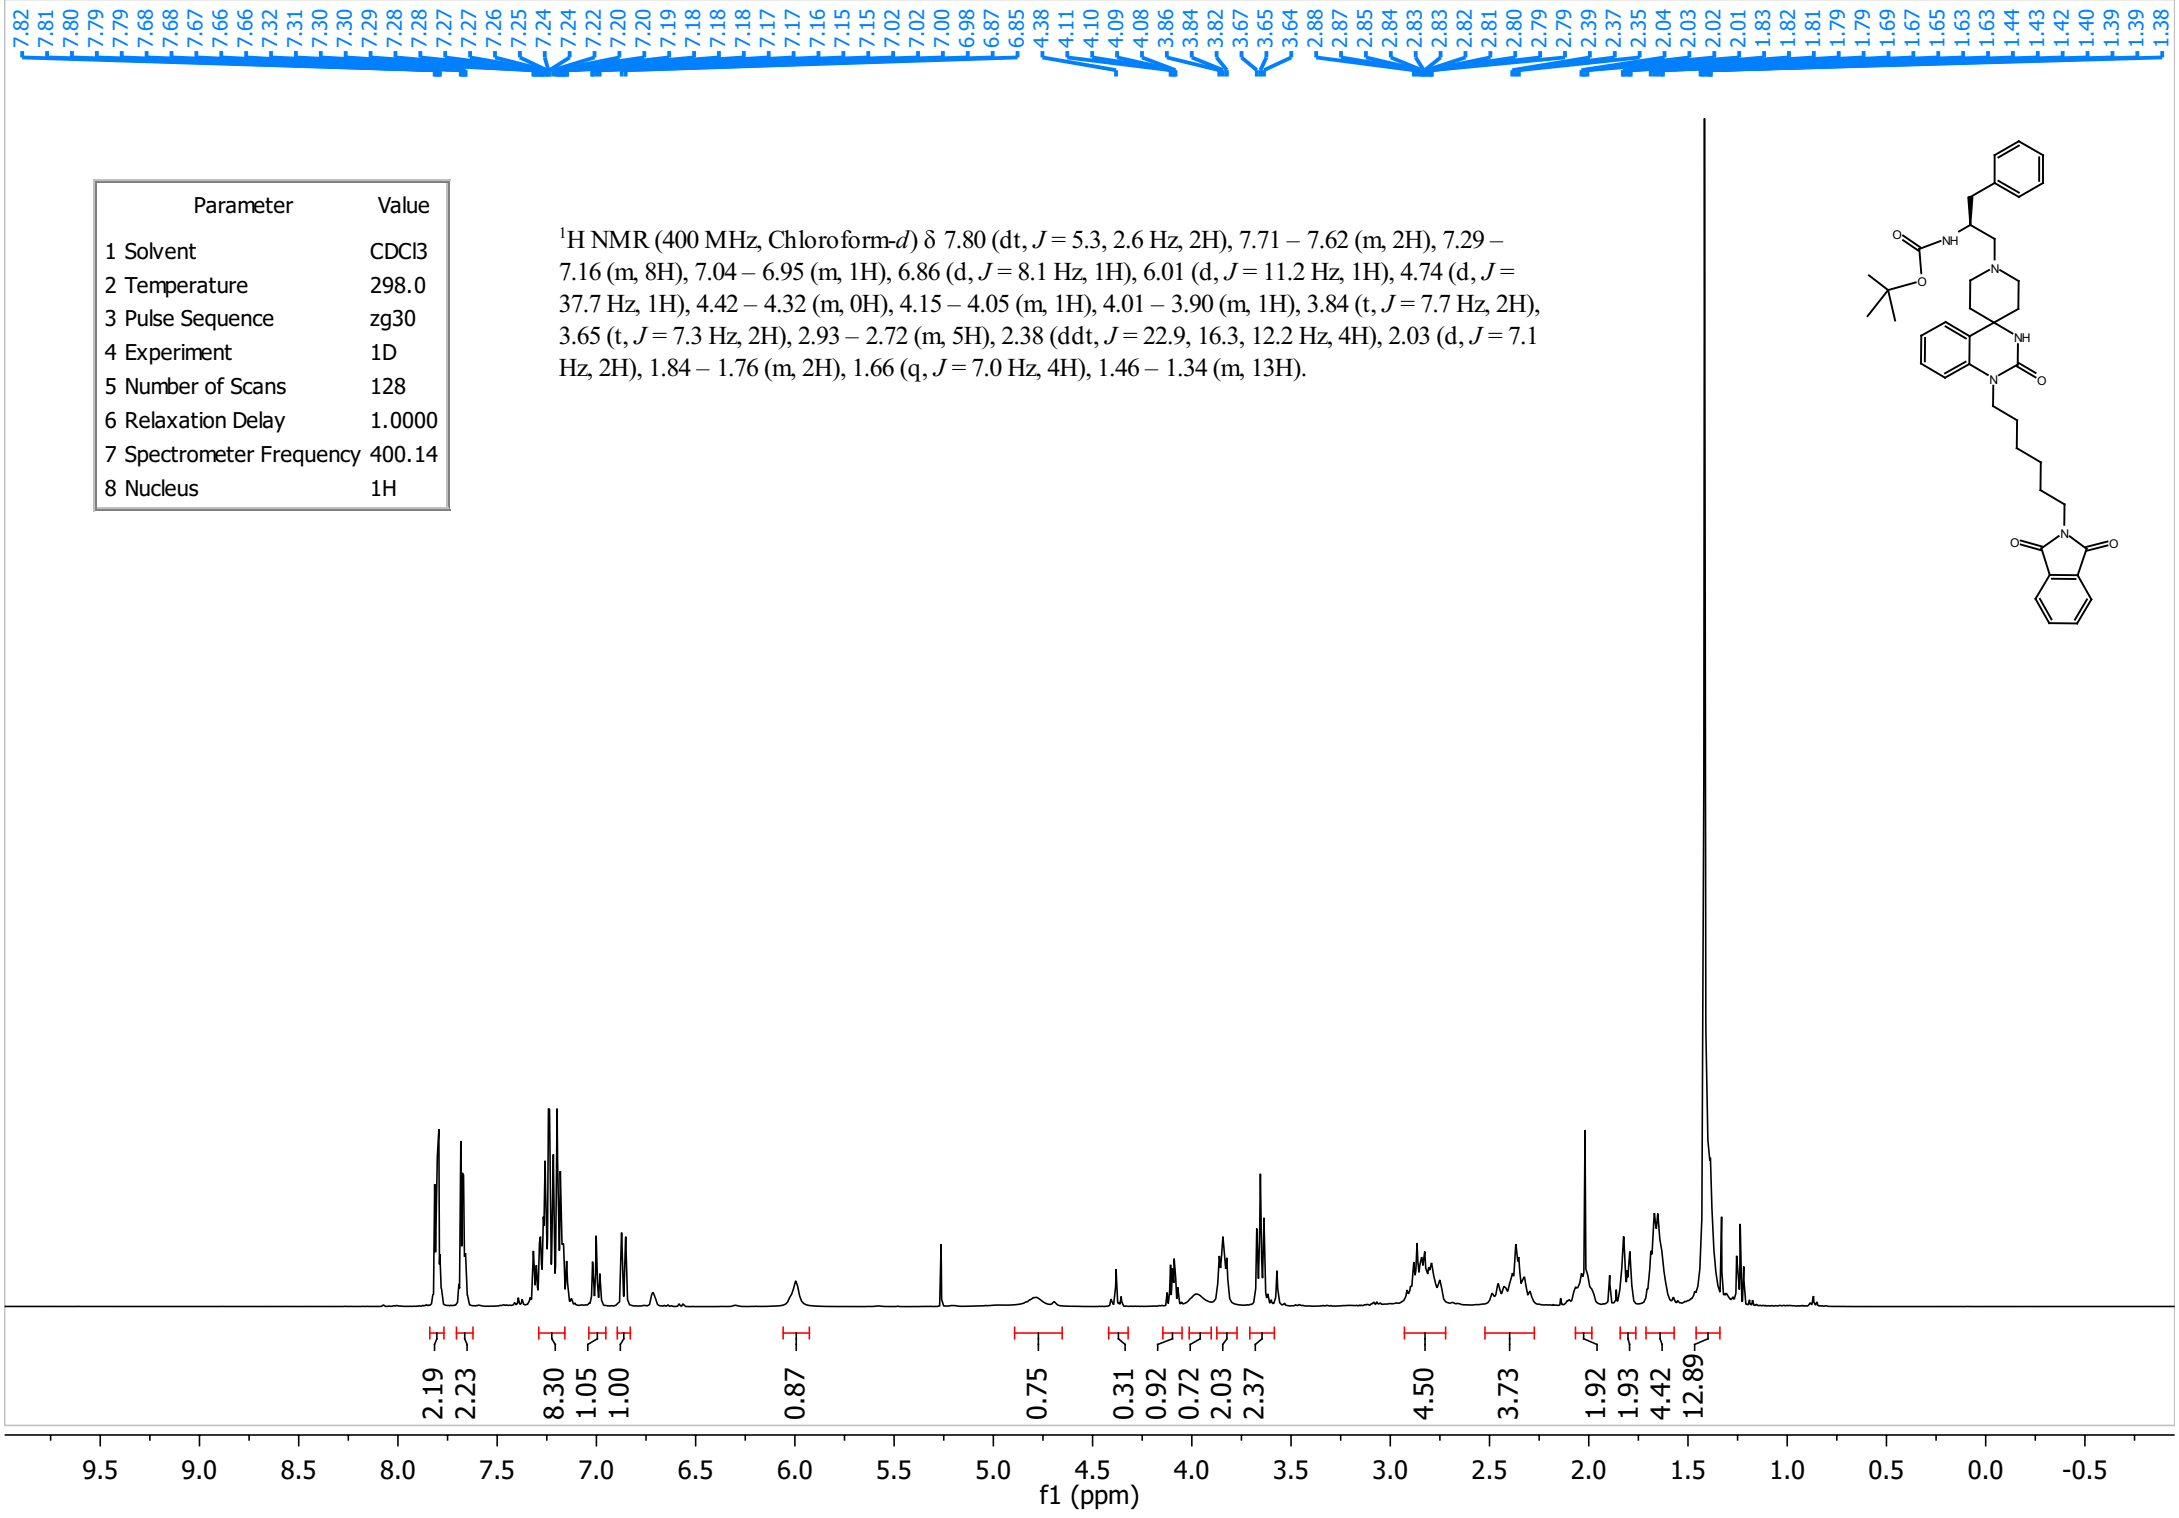

7.82  
7.81  
7.80  
7.79  
7.79  
7.68  
7.68  
7.67  
7.66  
7.66  
7.32  
7.31  
7.30  
7.30  
7.29  
7.28  
7.28  
7.27  
7.27  
7.26  
7.25  
7.24  
7.24  
7.22  
7.20  
7.20  
7.19  
7.18  
7.18  
7.18  
7.17  
7.17  
7.16  
7.15  
7.15  
7.02  
7.02  
7.00  
6.98  
6.87  
6.85  
4.38  
4.11  
4.10  
4.09  
4.08  
3.86  
3.84  
3.82  
3.67  
3.65  
3.64  
2.88  
2.87  
2.85  
2.84  
2.83  
2.83  
2.82  
2.81  
2.80  
2.79  
2.79  
2.39  
2.37  
2.35  
2.04  
2.03  
2.02  
2.01  
1.83  
1.82  
1.81  
1.79  
1.79  
1.69  
1.67  
1.65  
1.63  
1.63  
1.44  
1.43  
1.42  
1.40  
1.39  
1.39  
1.38

2.19  
2.23  
8.30  
1.05  
1.00  
0.87  
0.75  
0.31  
0.92  
0.72  
2.03  
2.37  
4.50  
3.73  
1.92  
1.93  
4.42  
12.89

9.5 9.0 8.5 8.0 7.5 7.0 6.5 6.0 5.5 5.0 4.5 4.0 3.5 3.0 2.5 2.0 1.5 1.0 0.5 0.0 -0.5

f1 (ppm)

| Parameter                | Value  |
|--------------------------|--------|
| 1 Solvent                | CDCl3  |
| 2 Temperature            | 298.0  |
| 3 Pulse Sequence         | zgpg30 |
| 4 Experiment             | 1D     |
| 5 Number of Scans        | 2056   |
| 6 Relaxation Delay       | 2.0000 |
| 7 Spectrometer Frequency | 100.62 |
| 8 Nucleus                | 13C    |

<sup>13</sup>C NMR (101 MHz, Chloroform-*d*)  $\delta$  168.43, 159.72, 155.80, 153.80, 137.24, 136.19, 133.93, 132.17, 129.64, 129.24, 129.14, 128.92, 128.76, 128.35, 128.22, 127.14, 126.34, 123.71, 123.21, 122.16, 113.45, 77.62, 77.30, 76.98, 69.50, 53.83, 52.92, 48.99, 48.26, 48.02, 41.84, 41.48, 37.92, 37.19, 37.16, 28.60, 28.50, 27.06, 26.68, 26.57.

168.43  
159.72  
155.80  
153.80  
137.24  
136.19  
133.93  
132.17  
129.64  
129.24  
129.14  
128.92  
128.76  
128.35  
128.22  
127.14  
126.34  
123.71  
123.21  
122.16  
113.45

77.62  
77.30  
76.98  
69.50

53.83  
52.92  
48.99  
48.26  
48.02  
41.84  
41.48  
37.92  
37.19  
37.16  
28.60  
28.50  
27.06  
26.68  
26.57

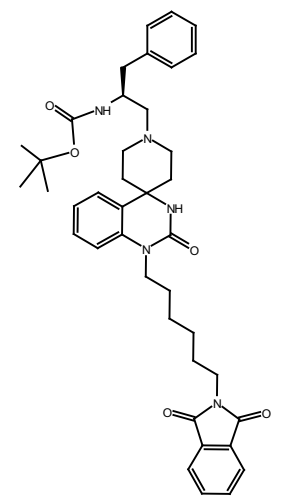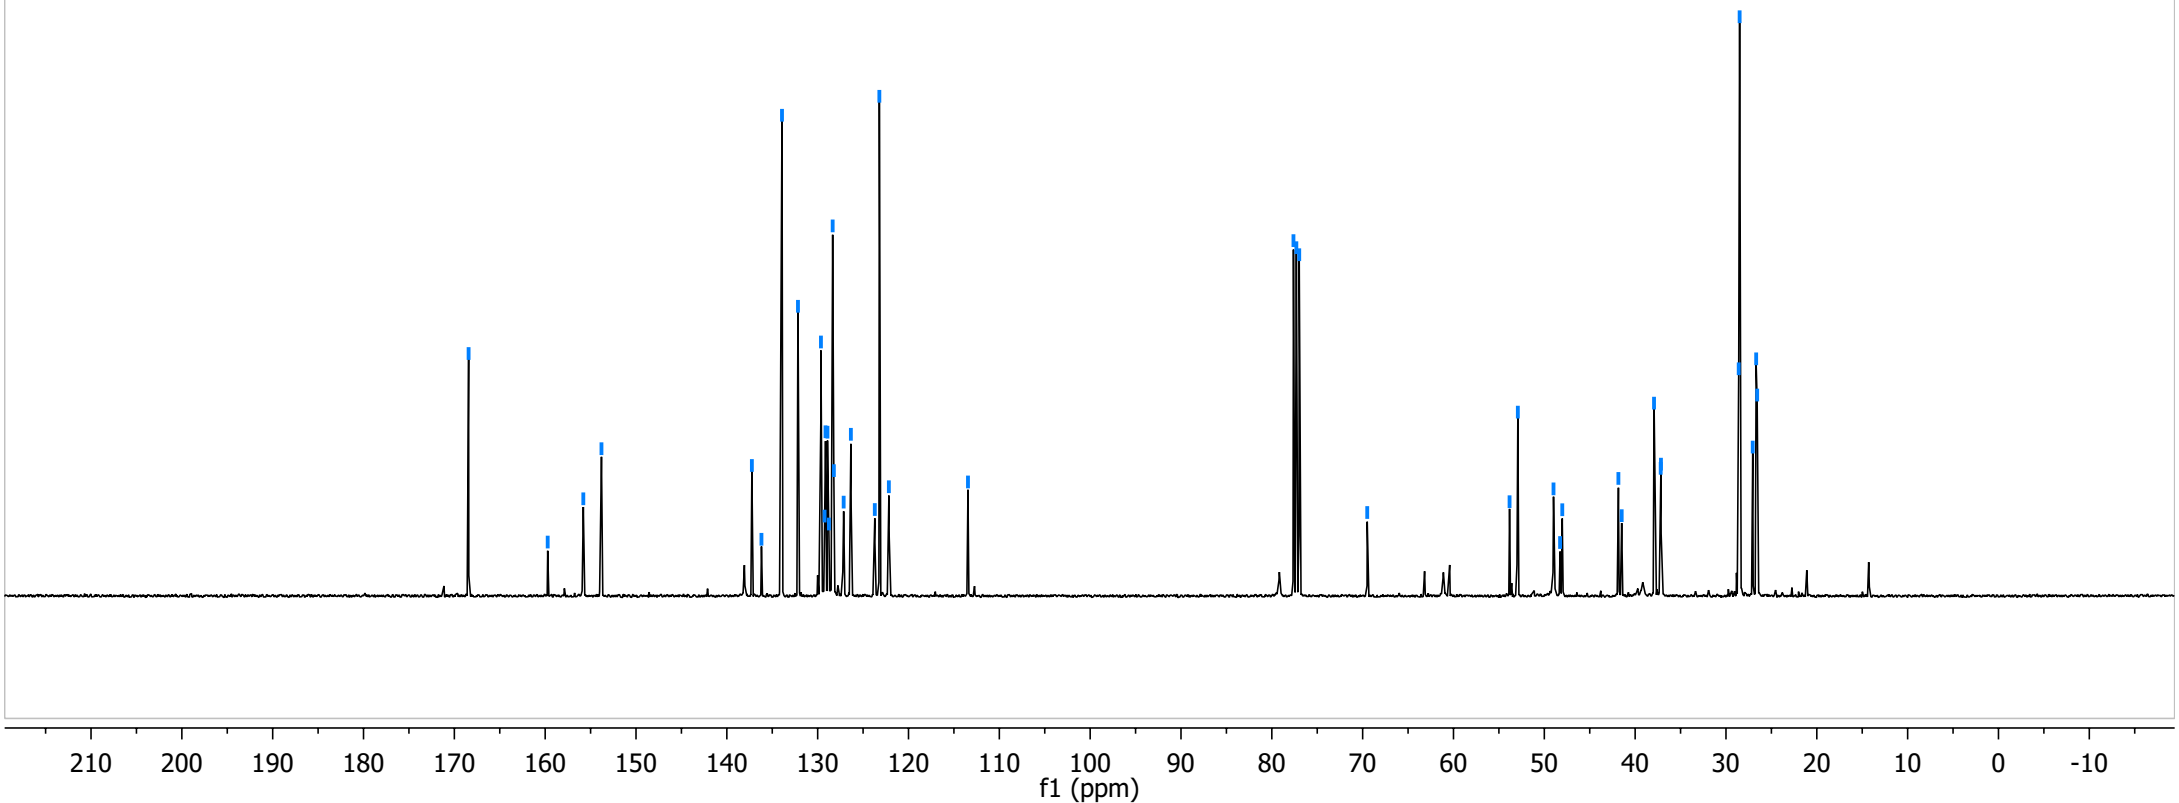

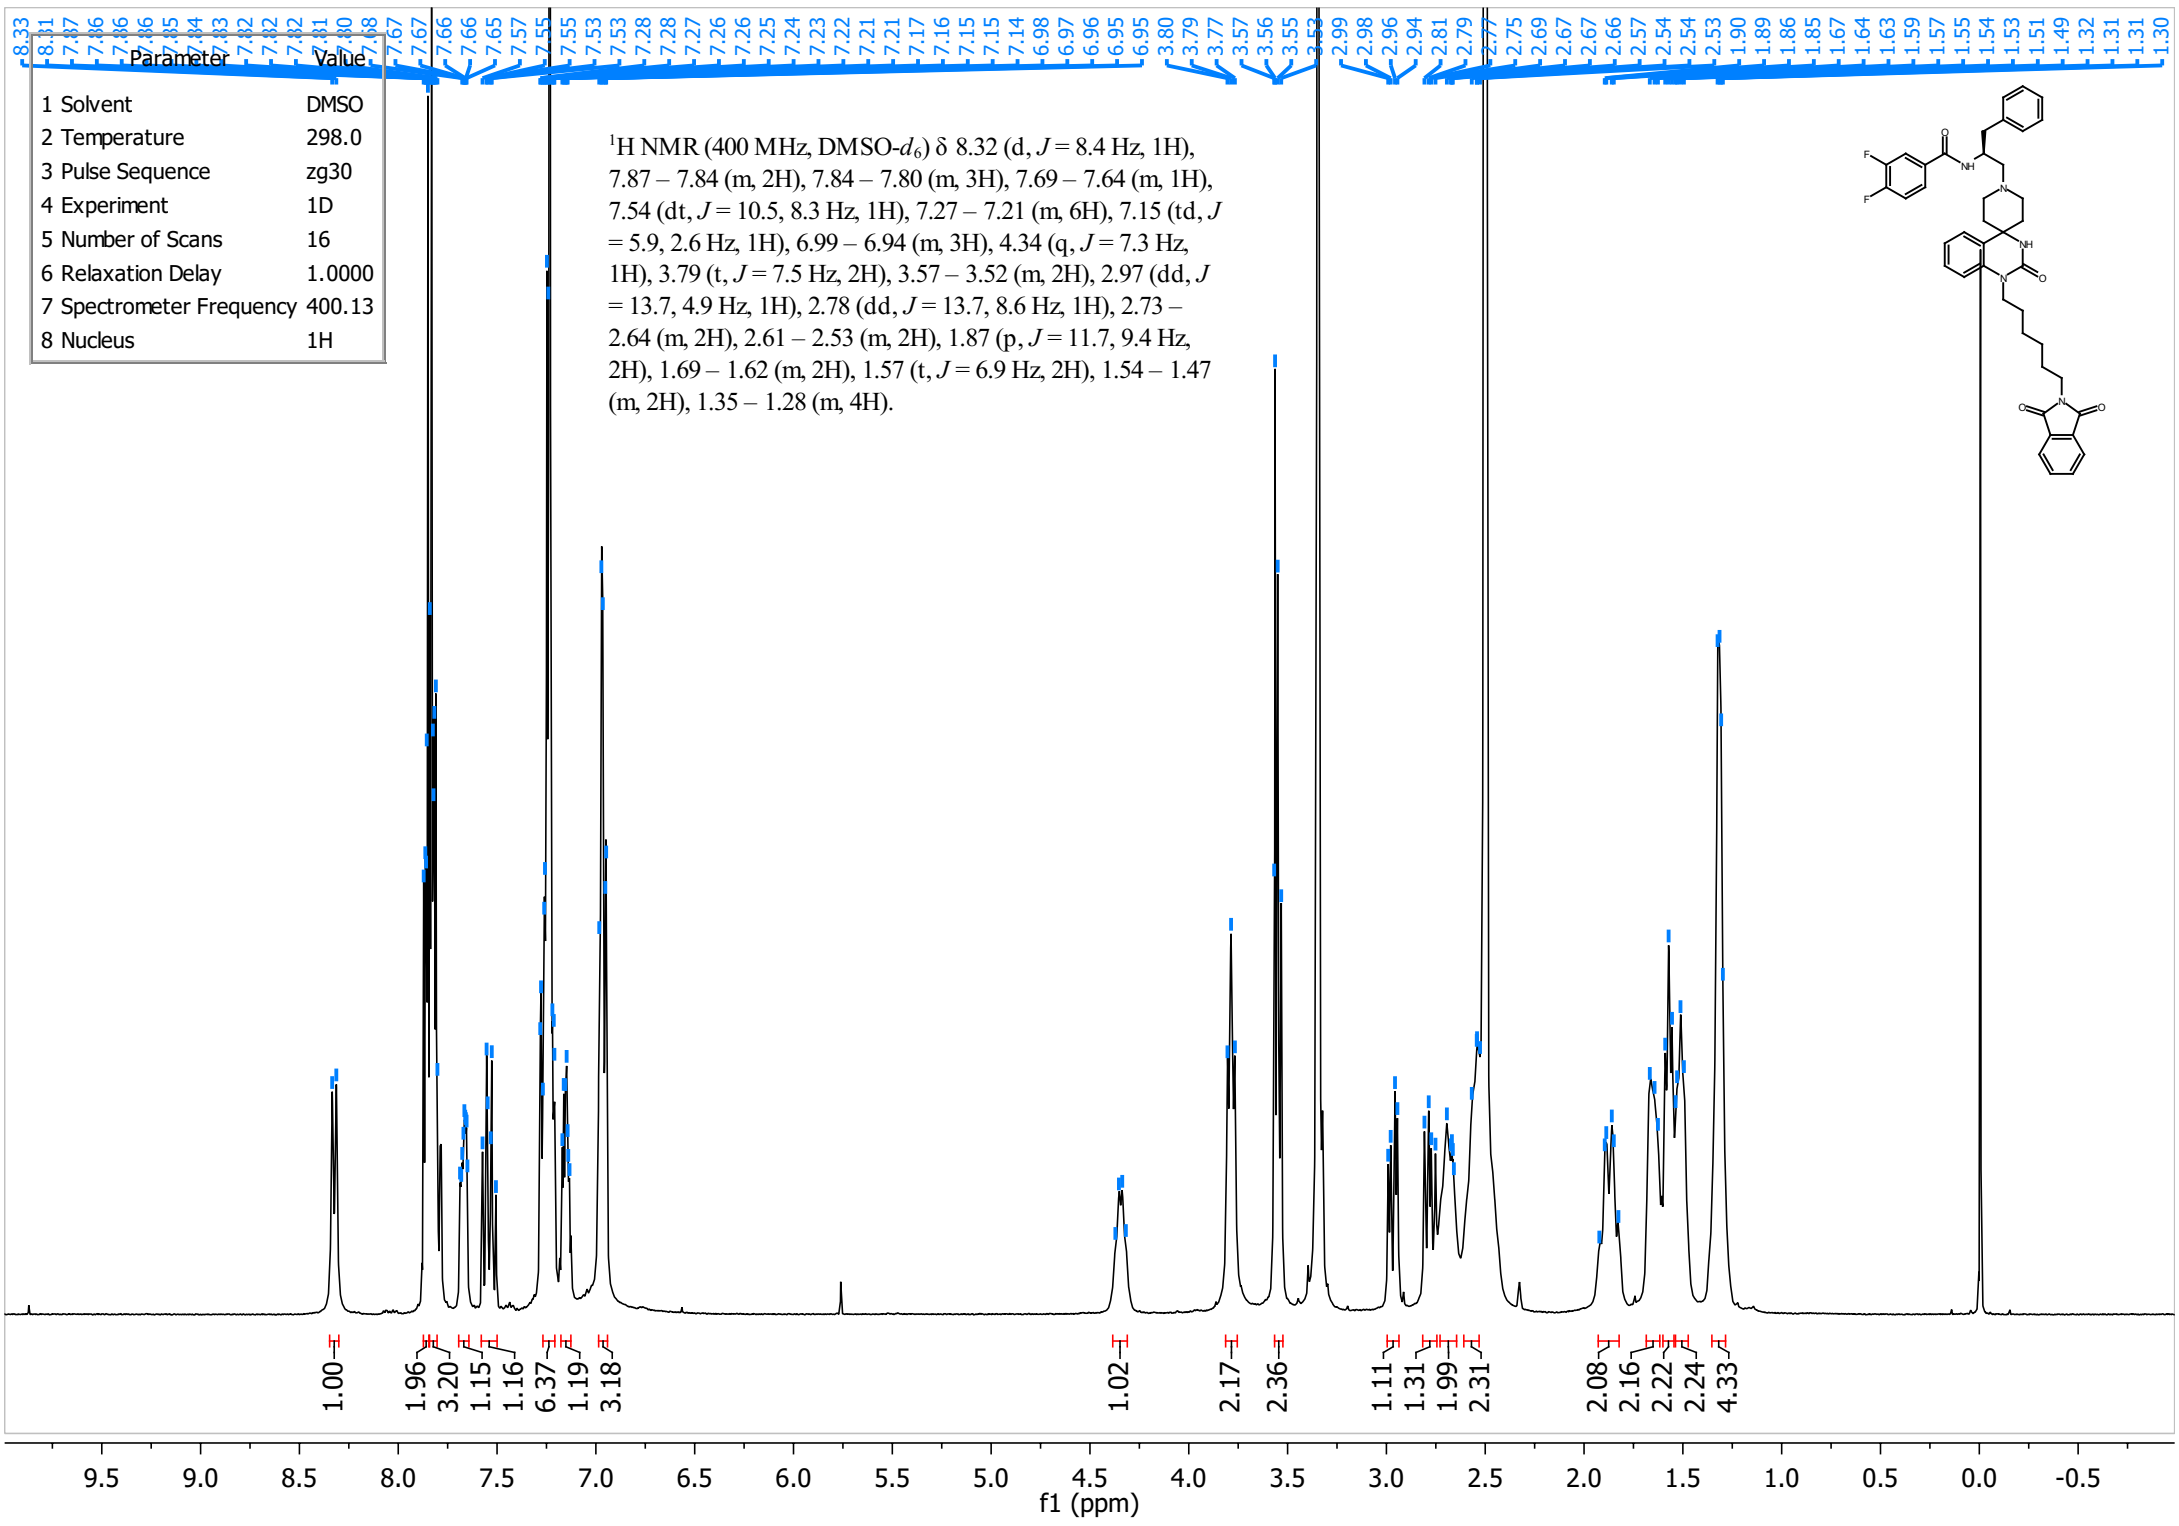

1.00

1.96

3.20

1.15

1.16

6.37

1.19

3.18

1.02

2.17

2.36

1.11

1.31

1.99

2.31

2.08

2.16

2.22

2.24

4.33

8.33 8.11 7.87 7.86 7.86 7.85 7.84 7.83 7.82 7.82 7.81 7.80 7.78 7.67 7.66 7.66 7.65 7.55 7.55 7.53 7.53 7.28 7.28 7.27 7.26 7.26 7.25 7.24 7.23 7.22 7.21 7.21 7.17 7.16 7.15 7.15 7.14 6.98 6.97 6.95 6.95 3.80 3.79 3.77 3.57 3.56 3.55 3.53 2.99 2.98 2.96 2.94 2.81 2.79 2.77 2.75 2.69 2.67 2.67 2.66 2.57 2.54 2.54 2.53 2.53 1.90 1.89 1.86 1.85 1.67 1.64 1.63 1.59 1.57 1.55 1.54 1.53 1.51 1.49 1.32 1.31 1.31 1.30

f1 (ppm)



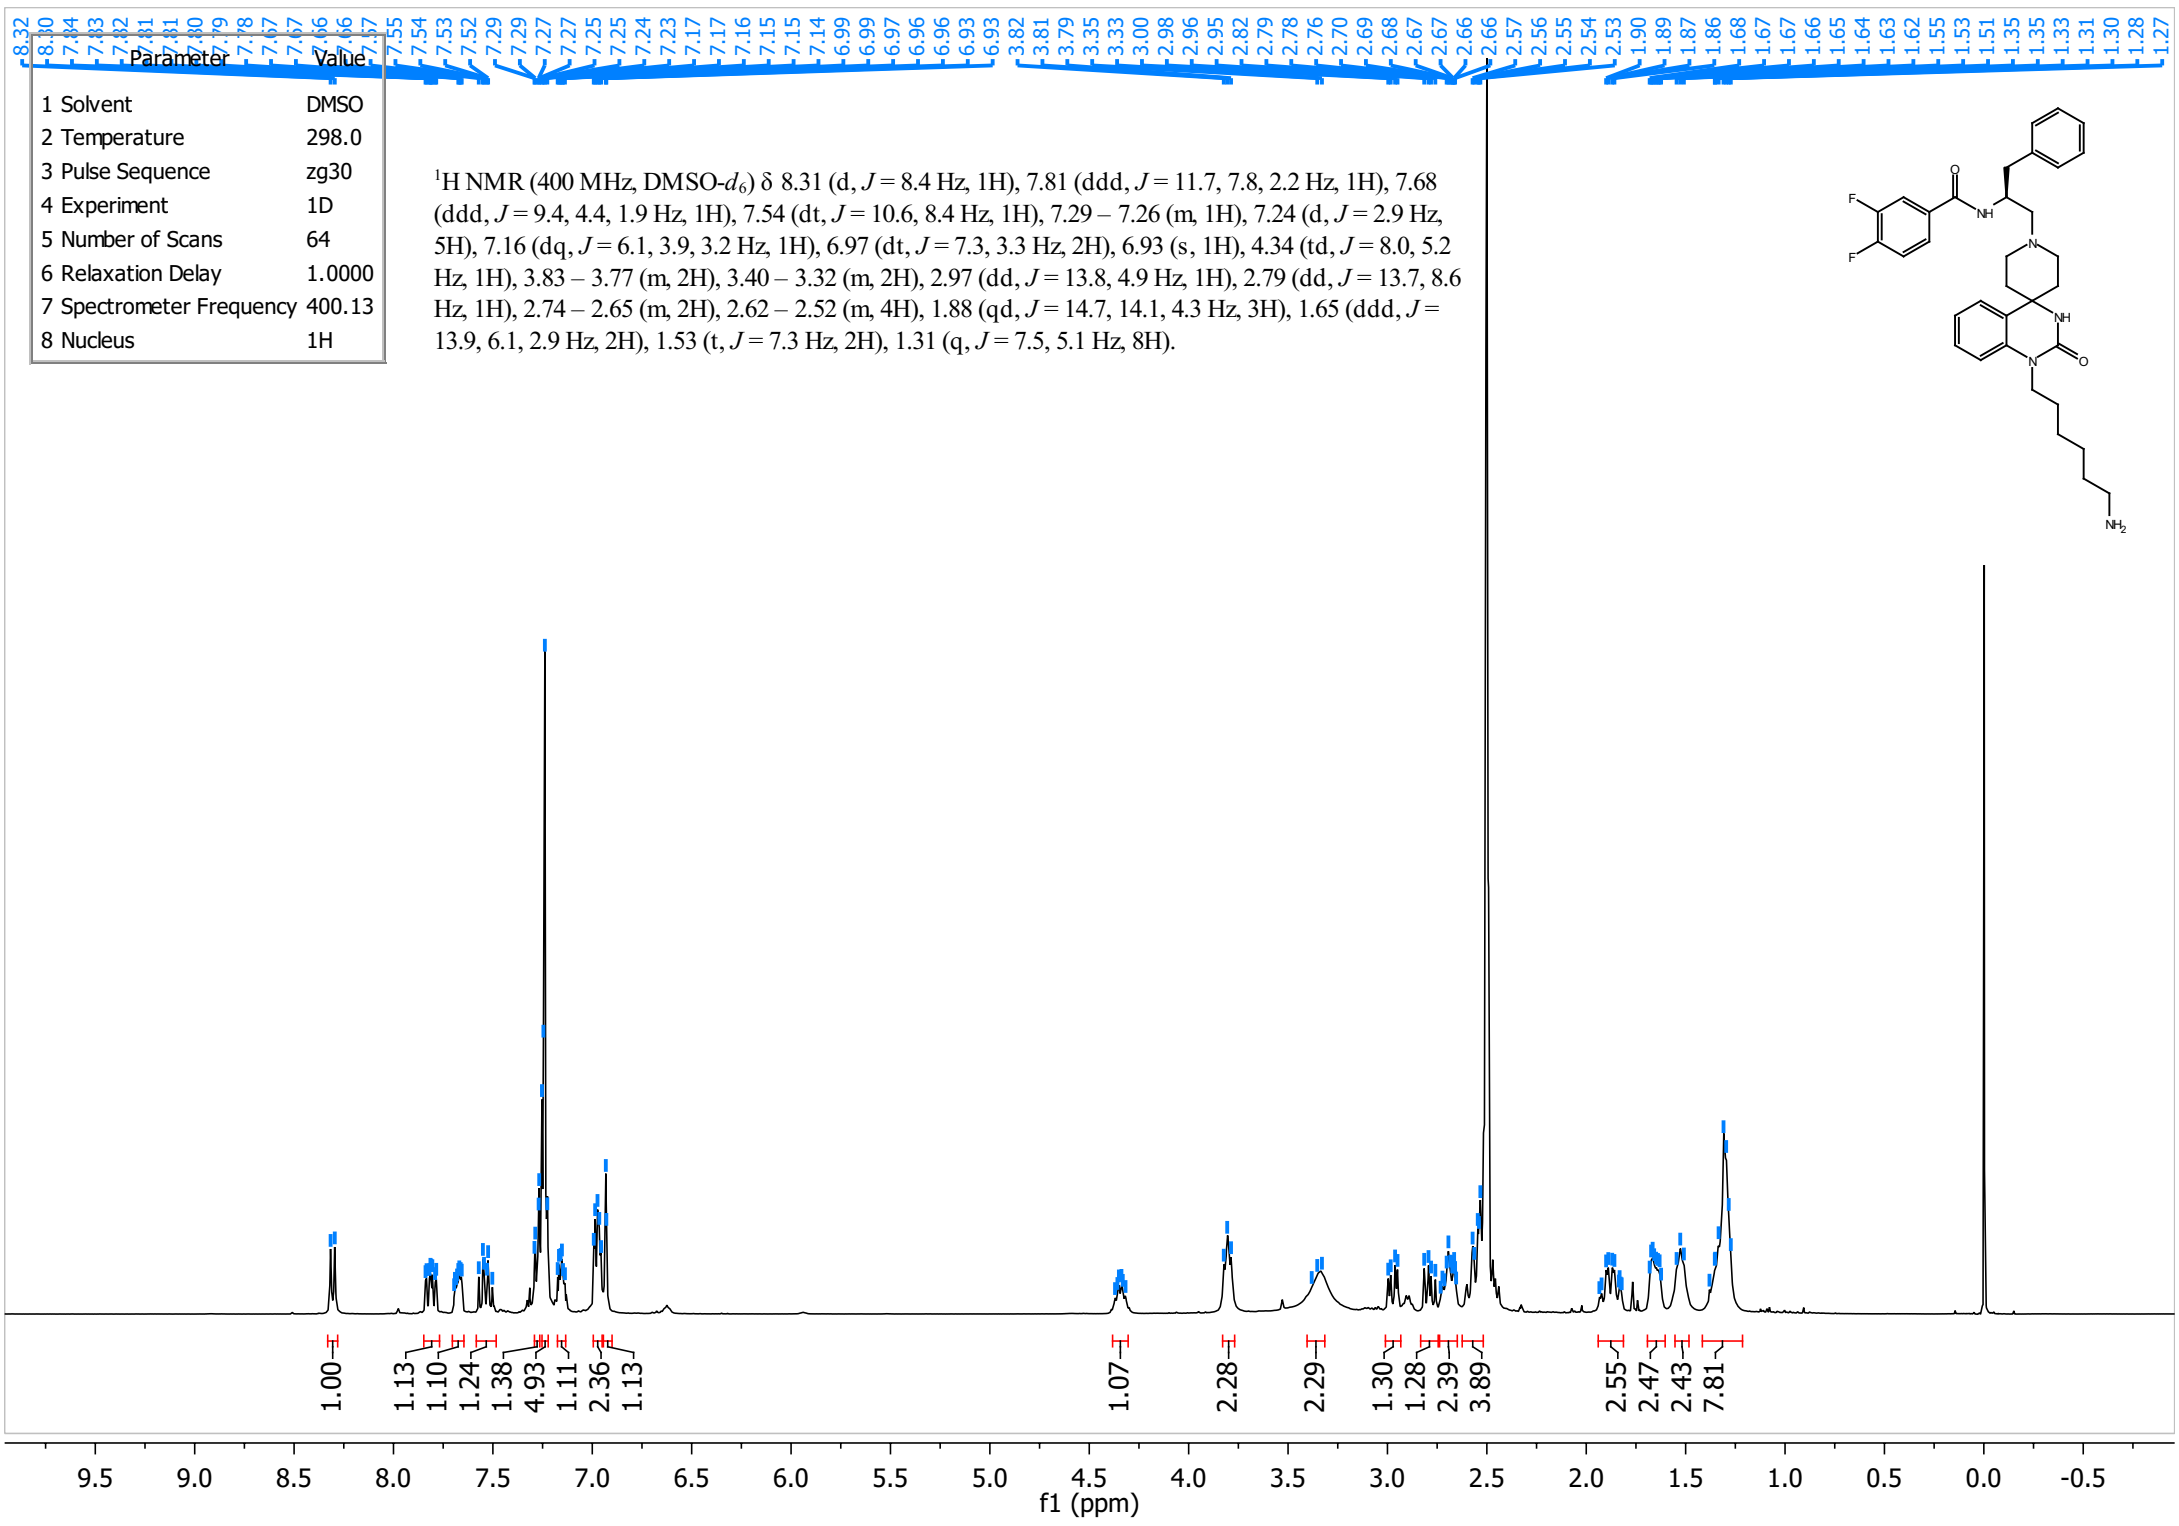

| Parameter                | Value  |
|--------------------------|--------|
| 1 Solvent                | DMSO   |
| 2 Temperature            | 298.0  |
| 3 Pulse Sequence         | zg30   |
| 4 Experiment             | 1D     |
| 5 Number of Scans        | 64     |
| 6 Relaxation Delay       | 1.0000 |
| 7 Spectrometer Frequency | 400.13 |
| 8 Nucleus                | 1H     |

<sup>1</sup>H NMR (400 MHz, DMSO-*d*<sub>6</sub>) δ 8.31 (d, *J* = 8.4 Hz, 1H), 7.81 (ddd, *J* = 11.7, 7.8, 2.2 Hz, 1H), 7.68 (ddd, *J* = 9.4, 4.4, 1.9 Hz, 1H), 7.54 (dt, *J* = 10.6, 8.4 Hz, 1H), 7.29 – 7.26 (m, 1H), 7.24 (d, *J* = 2.9 Hz, 5H), 7.16 (dq, *J* = 6.1, 3.9, 3.2 Hz, 1H), 6.97 (dt, *J* = 7.3, 3.3 Hz, 2H), 6.93 (s, 1H), 4.34 (td, *J* = 8.0, 5.2 Hz, 1H), 3.83 – 3.77 (m, 2H), 3.40 – 3.32 (m, 2H), 2.97 (dd, *J* = 13.8, 4.9 Hz, 1H), 2.79 (dd, *J* = 13.7, 8.6 Hz, 1H), 2.74 – 2.65 (m, 2H), 2.62 – 2.52 (m, 4H), 1.88 (qd, *J* = 14.7, 14.1, 4.3 Hz, 3H), 1.65 (ddd, *J* = 13.9, 6.1, 2.9 Hz, 2H), 1.53 (t, *J* = 7.3 Hz, 2H), 1.31 (q, *J* = 7.5, 5.1 Hz, 8H).

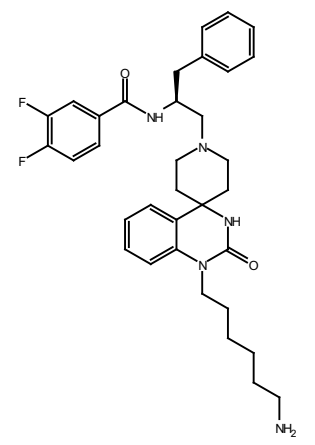



| Parameter                | Value  |
|--------------------------|--------|
| 1 Solvent                | DMSO   |
| 2 Temperature            | 298.0  |
| 3 Pulse Sequence         | zgpg30 |
| 4 Experiment             | 1D     |
| 5 Number of Scans        | 1024   |
| 6 Relaxation Delay       | 2.0000 |
| 7 Spectrometer Frequency | 100.61 |
| 8 Nucleus                | 13C    |

$^{13}\text{C}$  NMR (101 MHz, DMSO- $d_6$ )  $\delta$  162.63, 152.20, 138.21, 136.23, 131.18, 128.29, 128.08, 127.08, 126.92, 124.91, 123.58, 122.38, 120.60, 116.56, 116.38, 115.58, 115.40, 112.19, 60.22, 51.27, 47.92, 46.84, 46.45, 40.29, 39.73, 37.26, 35.33, 35.17, 31.79, 25.74, 25.24, 25.08.

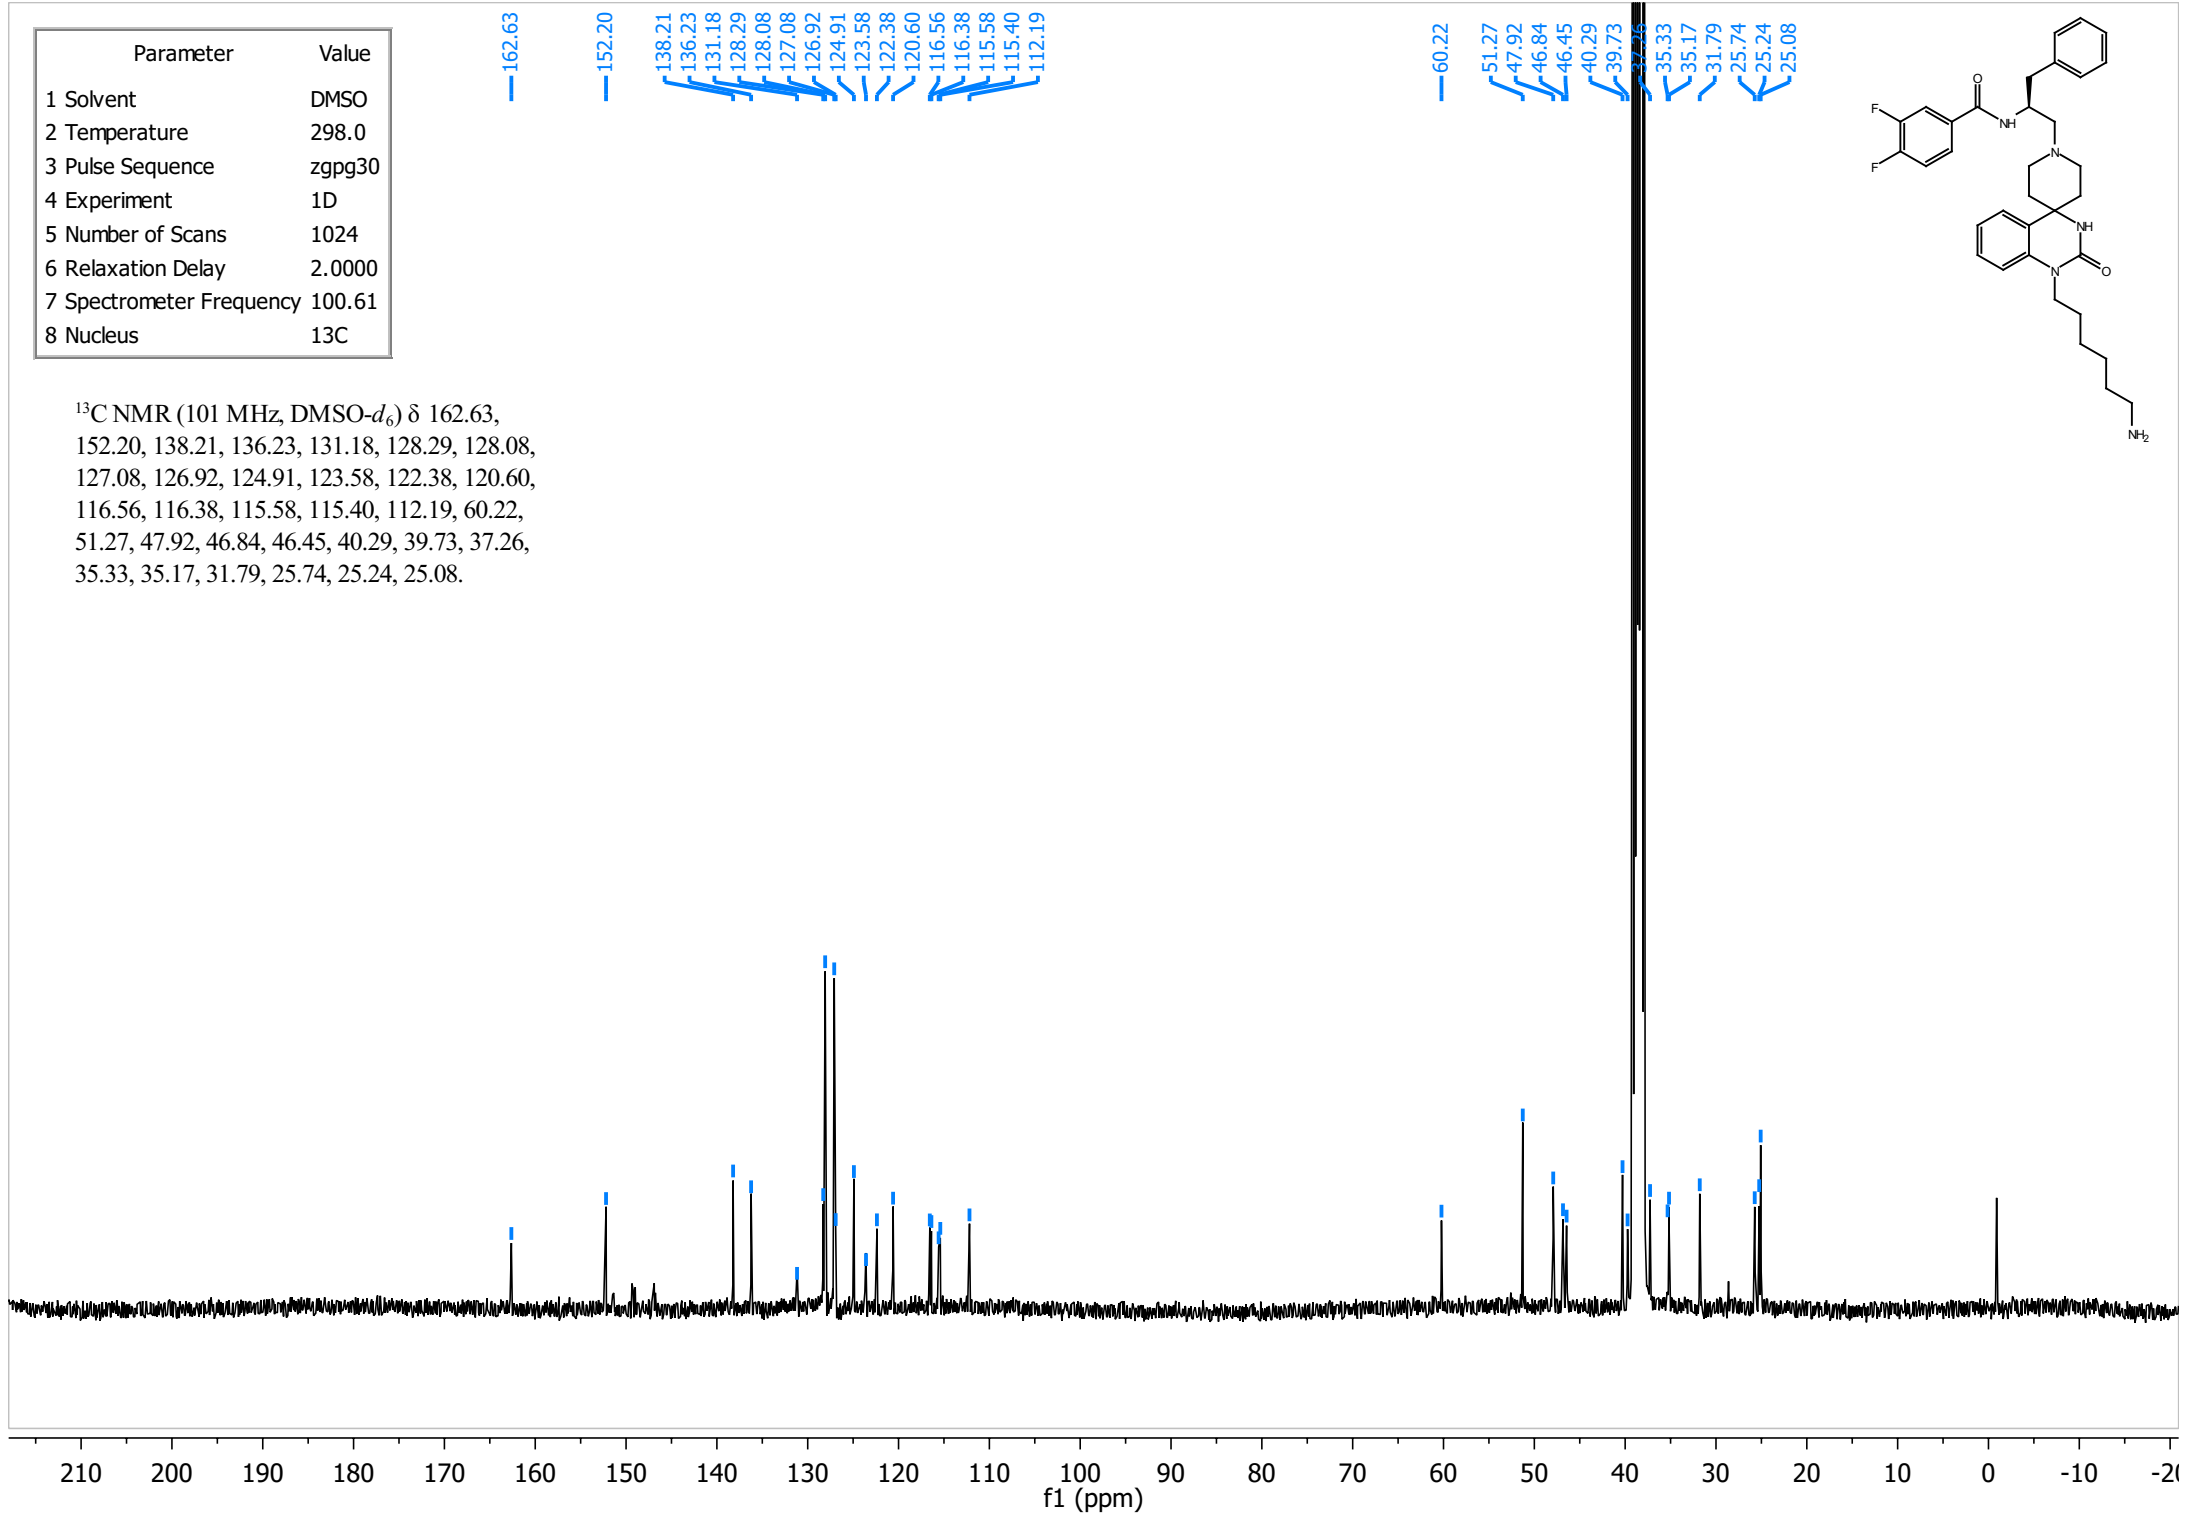

| Parameter                | Value           |
|--------------------------|-----------------|
| 1 Solvent                | DMSO            |
| 2 Temperature            | 298.0           |
| 3 Pulse Sequence         | zgfhigqn.2      |
| 4 Experiment             | 1D              |
| 5 Number of Scans        | 64              |
| 6 Relaxation Delay       | 1.0000          |
| 7 Spectrometer Frequency | 376.50          |
| 8 Nucleus                | <sup>19</sup> F |

<sup>19</sup>F NMR (376 MHz, DMSO-*d*<sub>6</sub>) δ -134.99 (d, *J* = 22.0 Hz), -138.13 (d, *J* = 21.9 Hz).

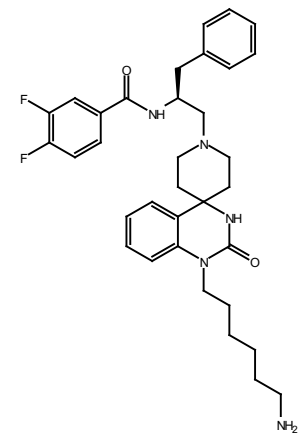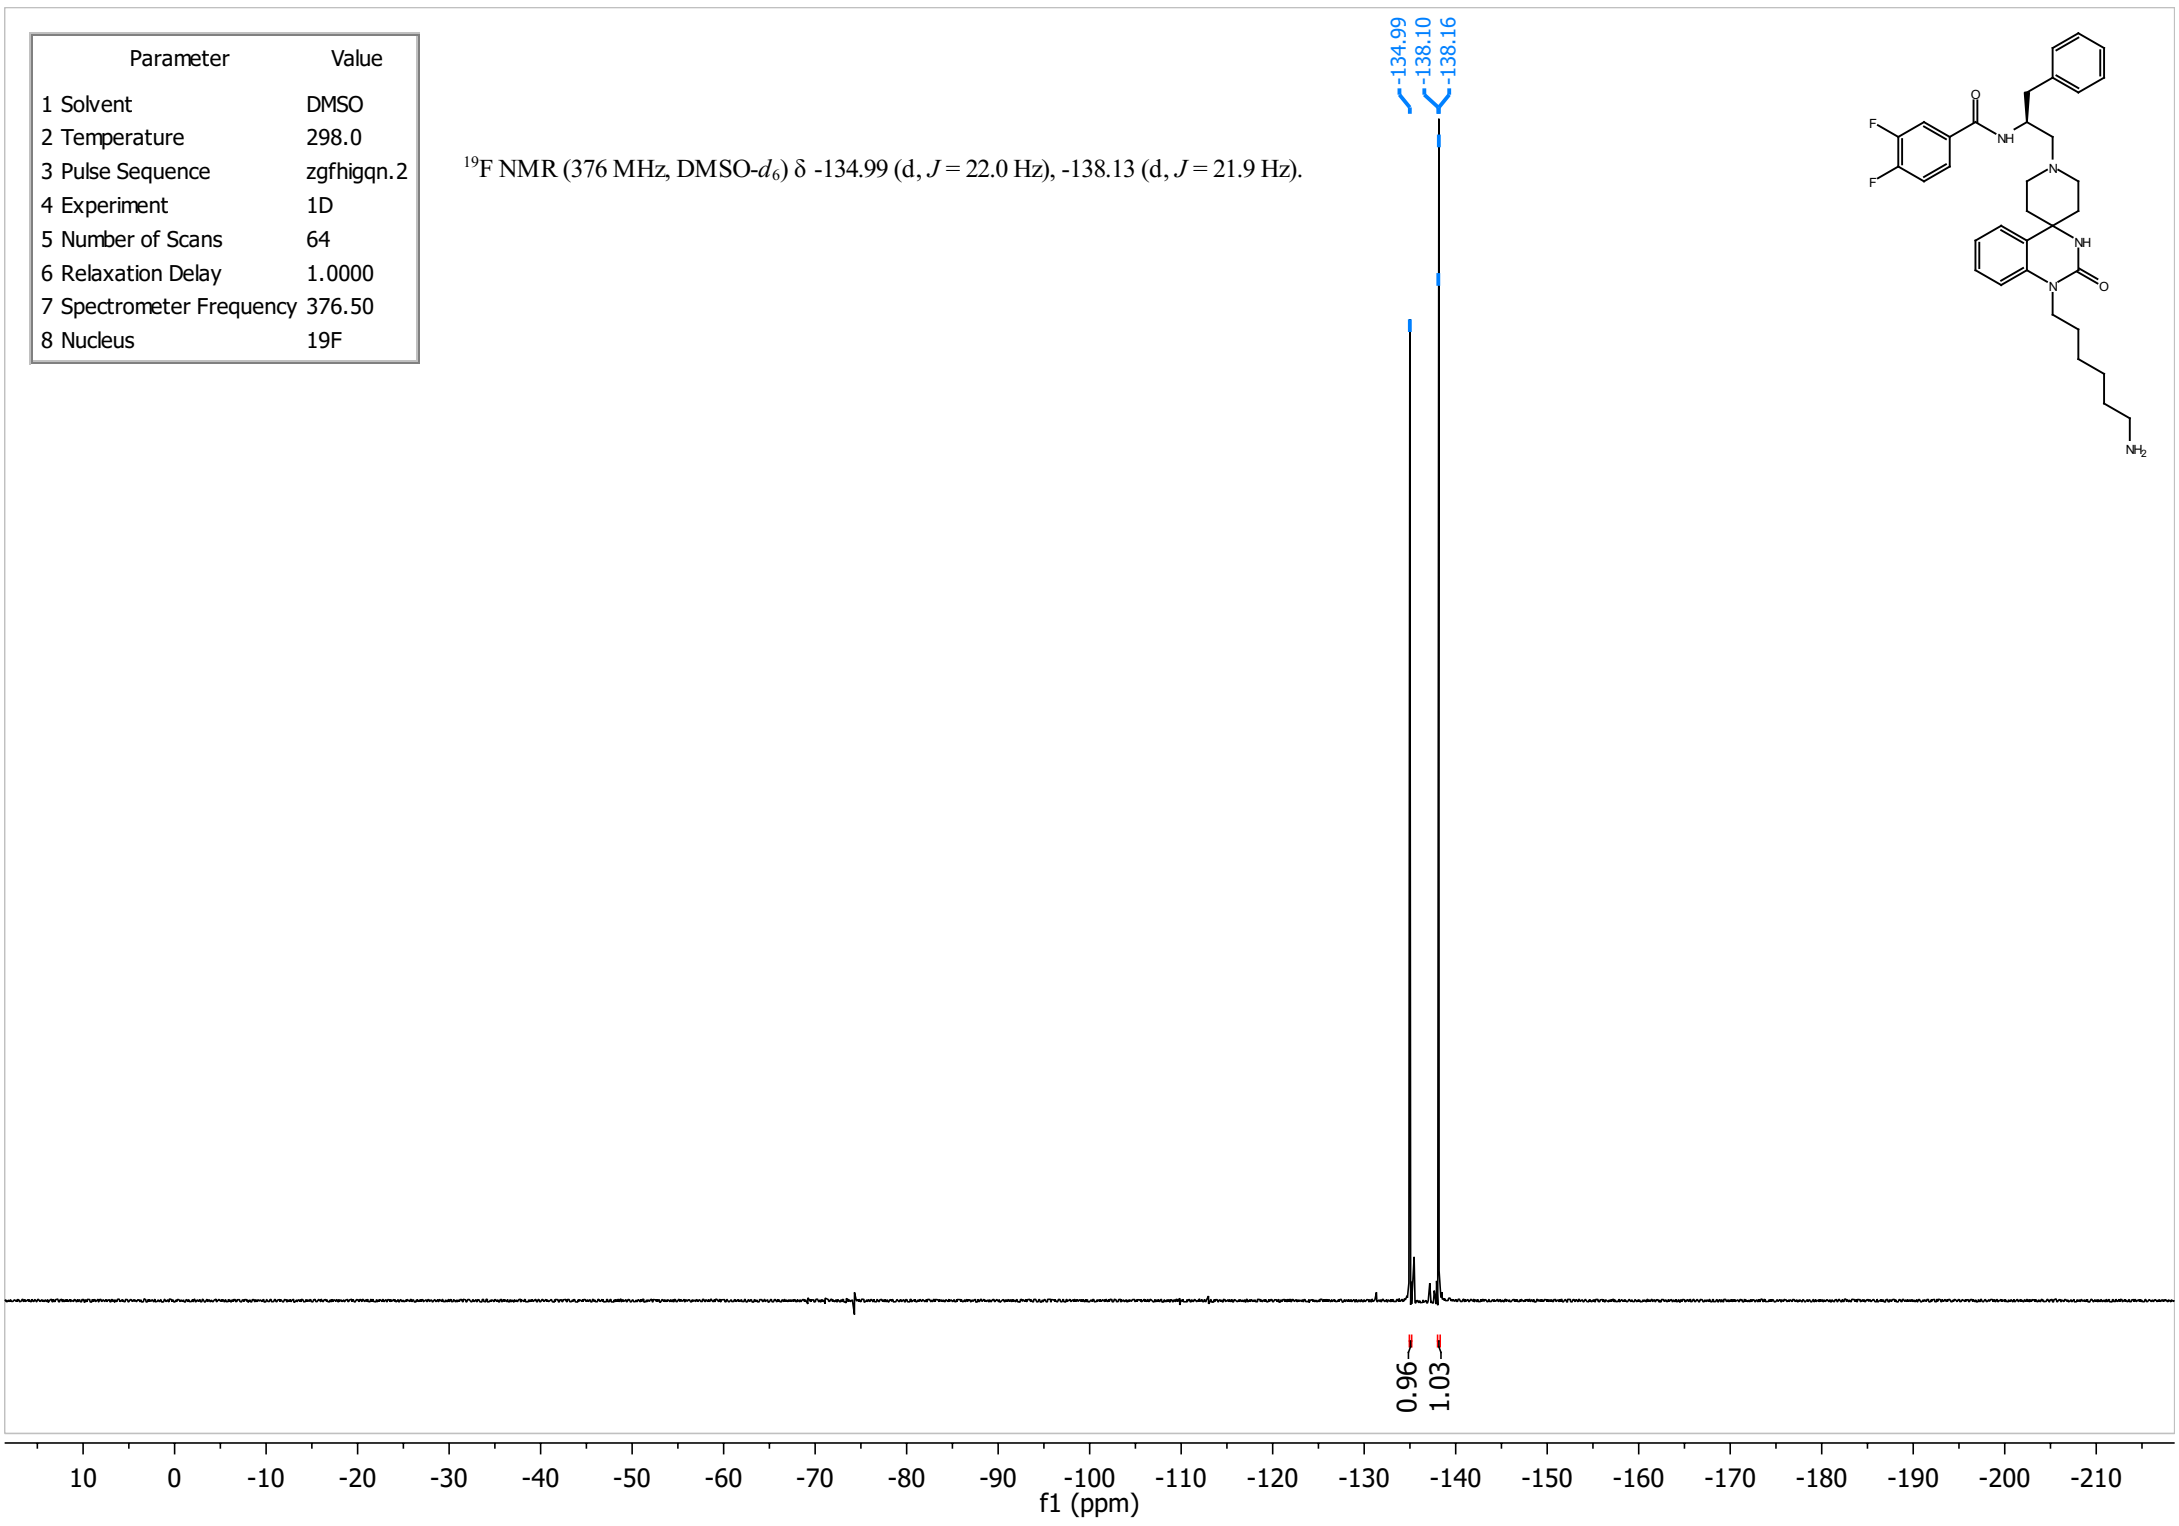

8.32 8.30 7.82 7.81 7.80 7.79 7.78 7.67 7.67 7.55 7.55 7.53 7.29 7.28 7.27 7.26 7.26 7.25 7.24 7.23 7.22 7.17 7.16 7.16 7.00 6.98 6.96 6.94 3.82 3.80 3.78 3.01 3.00 2.99 2.98 2.97 2.95 2.82 2.81 2.80 2.80 2.78 2.71 2.70 2.69 2.67 2.58 2.57 2.57 2.55 2.54 2.53 1.99 1.99 1.98 1.97 1.96 1.95 1.90 1.89 1.87 1.87 1.85 1.68 1.67 1.66 1.65 1.63 1.63 1.61 1.57 1.55 1.55 1.52 1.39 1.38 1.36 1.31 1.30 1.30 1.29

| Parameter                | Value          |
|--------------------------|----------------|
| 1 Solvent                | DMSO           |
| 2 Temperature            | 298.0          |
| 3 Pulse Sequence         | zg30           |
| 4 Experiment             | 1D             |
| 5 Number of Scans        | 256            |
| 6 Relaxation Delay       | 1.0000         |
| 7 Spectrometer Frequency | 400.14         |
| 8 Nucleus                | <sup>1</sup> H |

<sup>1</sup>H NMR (400 MHz, DMSO-*d*<sub>6</sub>) δ 8.31 (d, *J* = 8.4 Hz, 1H), 7.85 – 7.77 (m, 2H), 7.68 (ddt, *J* = 8.0, 4.6, 1.5 Hz, 1H), 7.54 (dt, *J* = 10.5, 8.3 Hz, 1H), 7.29 – 7.22 (m, 6H), 7.15 (ddd, *J* = 6.6, 5.7, 2.8 Hz, 1H), 6.97 (dd, *J* = 14.8, 7.1 Hz, 3H), 4.35 (td, *J* = 8.0, 5.2 Hz, 1H), 3.80 (t, *J* = 7.5 Hz, 2H), 2.99 (dq, *J* = 10.4, 5.6, 4.9 Hz, 3H), 2.83 – 2.75 (m, 2H), 2.69 (dq, *J* = 11.6, 5.9, 3.2 Hz, 2H), 2.58 – 2.53 (m, 2H), 1.97 (td, *J* = 7.4, 2.7 Hz, 2H), 1.87 (dd, *J* = 8.6, 6.8 Hz, 4H), 1.68 – 1.66 (m, 1H), 1.63 (dd, *J* = 8.6, 6.7 Hz, 3H), 1.55 (t, *J* = 7.4 Hz, 5H), 1.38 (p, *J* = 6.8 Hz, 2H), 1.30 (dd, *J* = 6.8, 3.5 Hz, 5H).

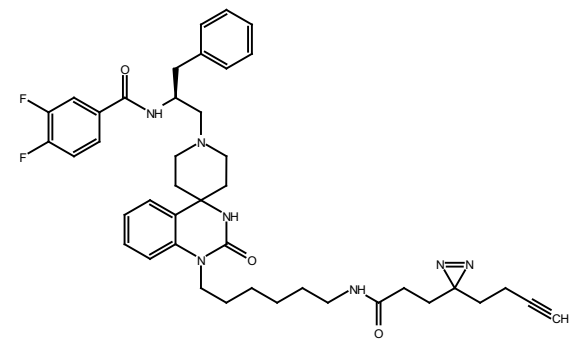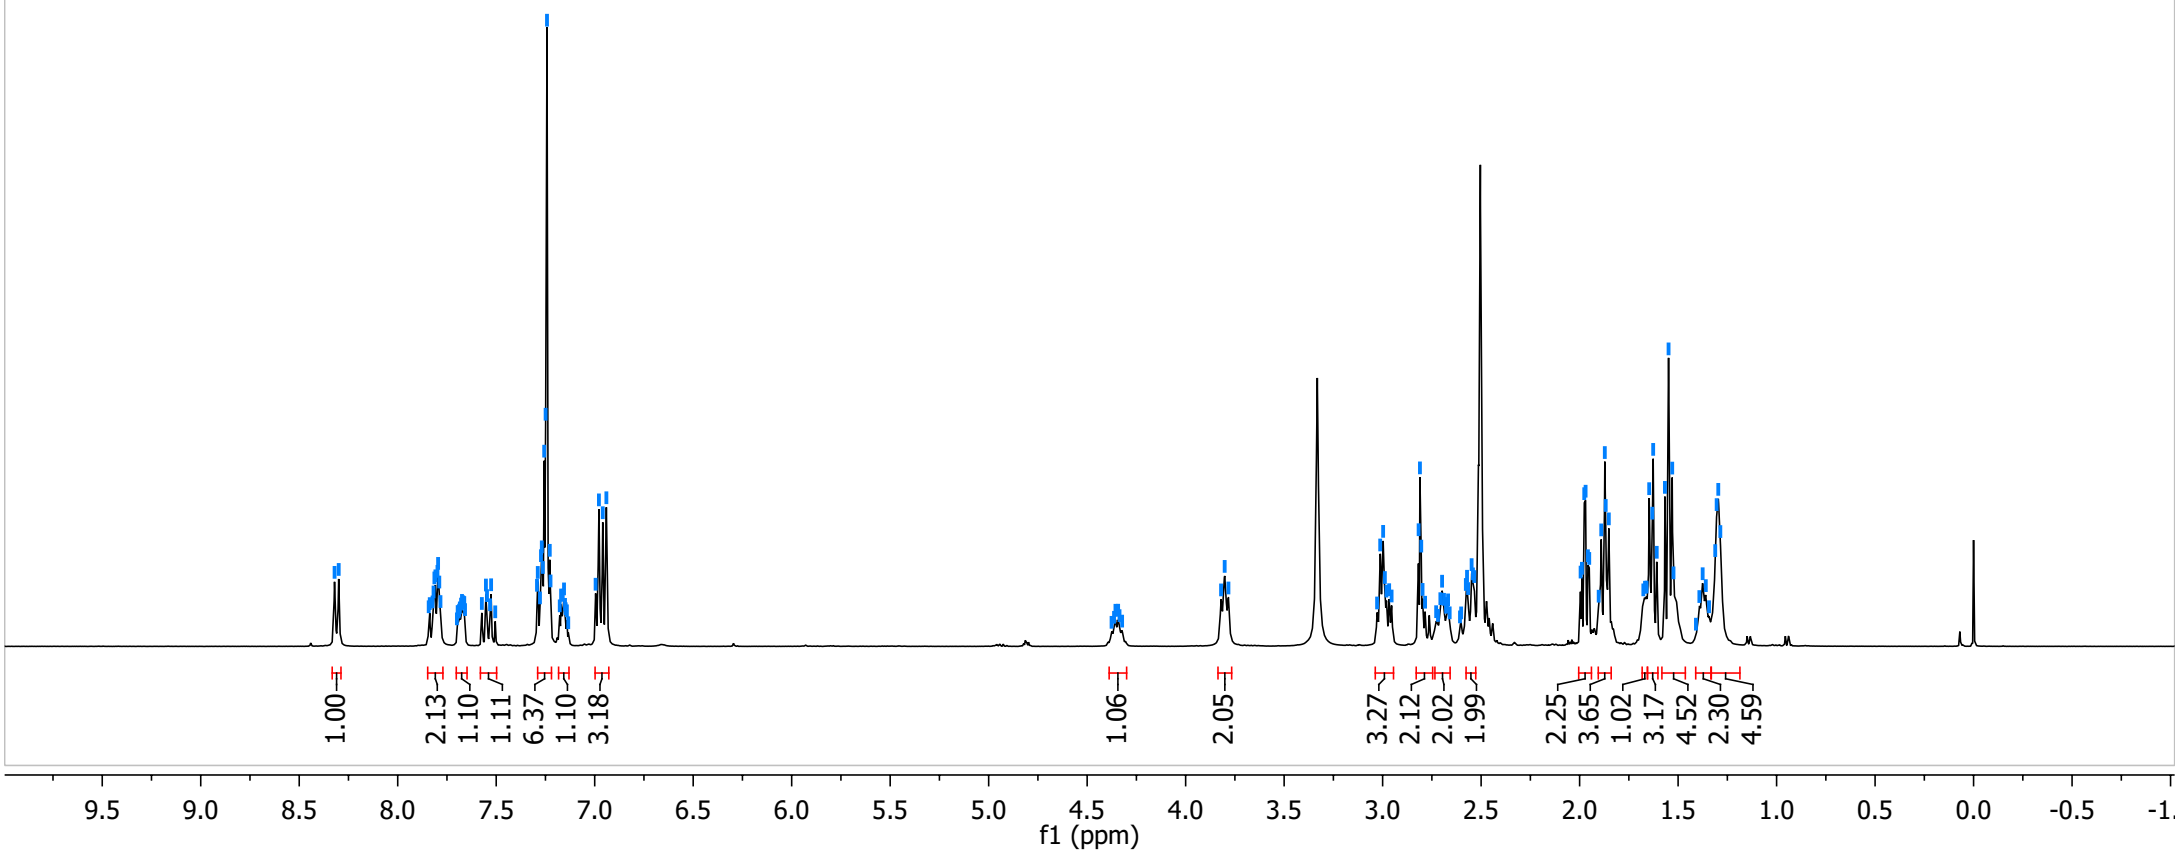

| Parameter                | Value  |
|--------------------------|--------|
| 1 Solvent                | DMSO   |
| 2 Temperature            | 298.0  |
| 3 Pulse Sequence         | zgpg30 |
| 4 Experiment             | 1D     |
| 5 Number of Scans        | 2056   |
| 6 Relaxation Delay       | 2.0000 |
| 7 Spectrometer Frequency | 100.62 |
| 8 Nucleus                | 13C    |

$^{13}\text{C}$  NMR (101 MHz, DMSO- $d_6$ )  $\delta$  170.36, 163.64, 153.20, 149.87, 147.90, 147.78, 139.22, 137.23, 132.15, 129.29, 129.08, 128.08, 127.92, 125.91, 124.58, 123.39, 121.61, 117.56, 117.38, 116.59, 116.41, 113.17, 83.14, 71.71, 61.23, 52.29, 48.92, 47.85, 47.46, 40.77, 38.40, 38.26, 36.34, 36.18, 31.46, 29.49, 29.02, 28.25, 28.14, 26.68, 26.11, 26.06, 12.65.

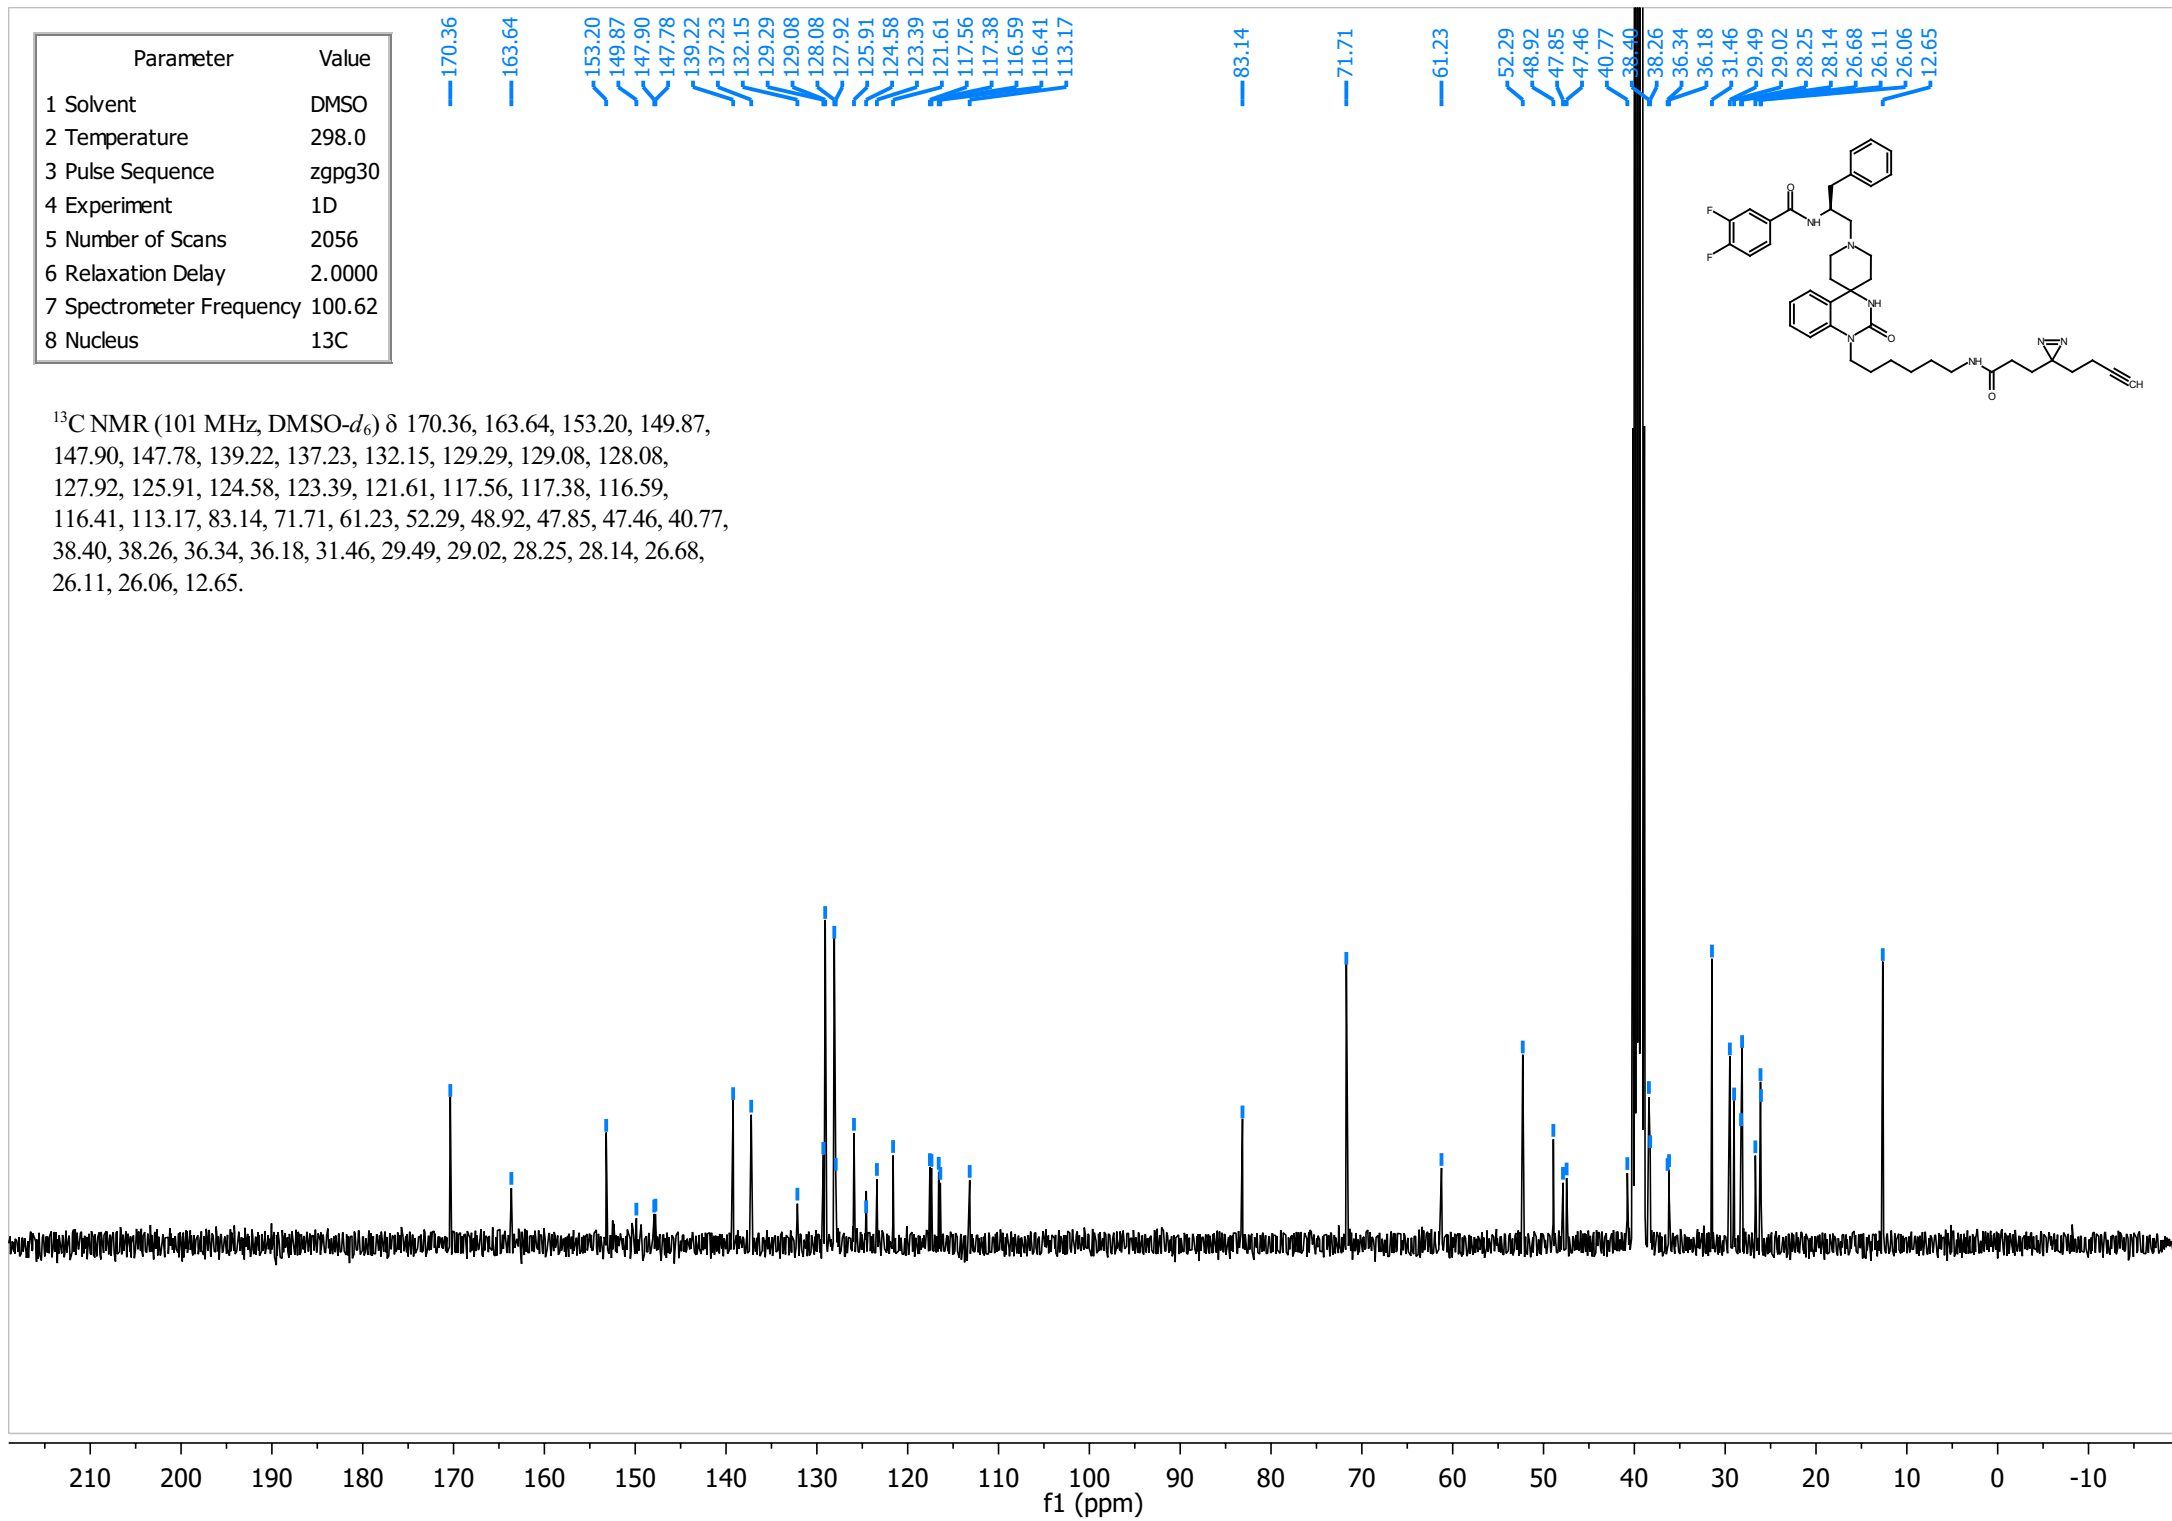

| Parameter                | Value           |
|--------------------------|-----------------|
| 1 Solvent                | DMSO            |
| 2 Temperature            | 298.0           |
| 3 Pulse Sequence         | zgfhigqn.2      |
| 4 Experiment             | 1D              |
| 5 Number of Scans        | 64              |
| 6 Relaxation Delay       | 1.0000          |
| 7 Spectrometer Frequency | 376.51          |
| 8 Nucleus                | <sup>19</sup> F |

<sup>19</sup>F NMR (377 MHz, DMSO-*d*<sub>6</sub>) δ -135.01 (d, *J* = 21.9 Hz), -138.12 (d, *J* = 22.6 Hz).

-134.98  
-135.04  
-138.09  
-138.15

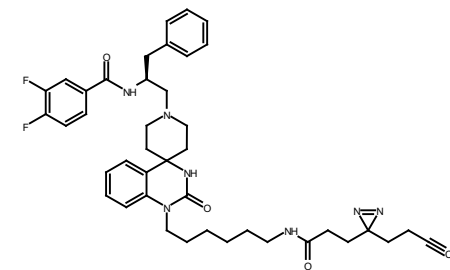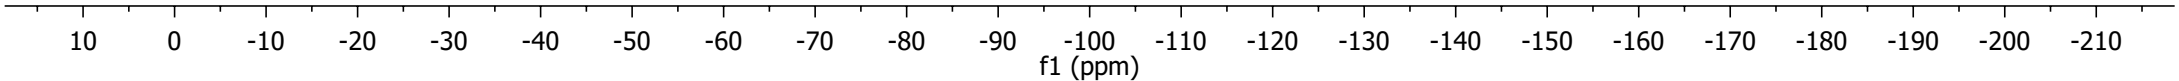

Supplement: NIHMS1581635-supplement-Supplementary_Spectra.pdf [file NIHMS1581635-supplement-Supplementary_Spectra.pdf]
