# Supplementary material
Source: PubMed Central journal article supplement (PMC7251565)
Supplement: NIHMS1581635-supplement-Supplementary_Figures.pdf [file NIHMS1581635-supplement-Supplementary_Figures.pdf]

In the format provided by the authors and unedited.

# Discovery of a ZIP7 inhibitor from a Notch pathway screen

Erin Nolin<sup>1,5</sup>, Sara Gans<sup>1,5</sup>, Luis Llamas<sup>1</sup>, Somnath Bandyopadhyay<sup>1</sup>, Scott M. Brittain<sup>1</sup>, Paula Bernasconi-Elias<sup>1</sup>, Kyle P. Carter<sup>2</sup>, Joseph J. Loureiro<sup>1</sup>, Jason R. Thomas<sup>1</sup>, Markus Schirle<sup>1</sup>, Yi Yang<sup>1</sup>, Ning Guo<sup>1</sup>, Guglielmo Roma<sup>3</sup>, Sven Schuierer<sup>3</sup>, Martin Beibel<sup>3</sup>, Alicia Lindeman<sup>1</sup>, Frederic Sigoillot<sup>1</sup>, Amy Chen<sup>1</sup>, Kevin X. Xie<sup>1</sup>, Samuel Ho<sup>1</sup>, John Reece-Hoyes<sup>1</sup>, Wilhelm A. Weihofen<sup>1</sup>, Kayla Tyskiewicz<sup>1</sup>, Dominic Hoepfner<sup>3</sup>, Richard I. McDonald<sup>1</sup>, Nicolette Guthrie<sup>1</sup>, Abhishek Dogra<sup>1</sup>, Haibing Guo<sup>4</sup>, Jian Shao<sup>1</sup>, Jian Ding<sup>1</sup>, Stephen M. Canham<sup>1</sup>, Geoff Boynton<sup>1</sup>, Elizabeth L. George<sup>1</sup>, Zhao B. Kang<sup>1</sup>, Christophe Antczak<sup>1</sup>, Jeffery A. Porter<sup>1</sup>, Owen Wallace<sup>1</sup>, John A. Tallarico<sup>1</sup>, Amy E. Palmer<sup>2</sup>, Jeremy L. Jenkins<sup>1</sup>, Rishi K. Jain<sup>1</sup>, Simon M. Bushell<sup>1,6\*</sup> and Christy J. Fryer<sup>1,6\*</sup>

---

<sup>1</sup>Novartis Institutes for Biomedical Research, Cambridge, MA, USA. <sup>2</sup>Department of Chemistry and Biochemistry and BioFrontiers Institute, University of Colorado, Boulder, CO, USA. <sup>3</sup>Novartis Institutes for Biomedical Research, Basel, Switzerland. <sup>4</sup>Novartis Institutes for Biomedical Research, Shanghai, China. <sup>5</sup>These authors contributed equally: Erin Nolin, Sara Gans. <sup>6</sup>These authors jointly supervised this work: Simon M. Bushell, Christy J. Fryer.  
\*e-mail: [simon.bushell@novartis.com](mailto:simon.bushell@novartis.com); [christy.fryer@novartis.com](mailto:christy.fryer@novartis.com)

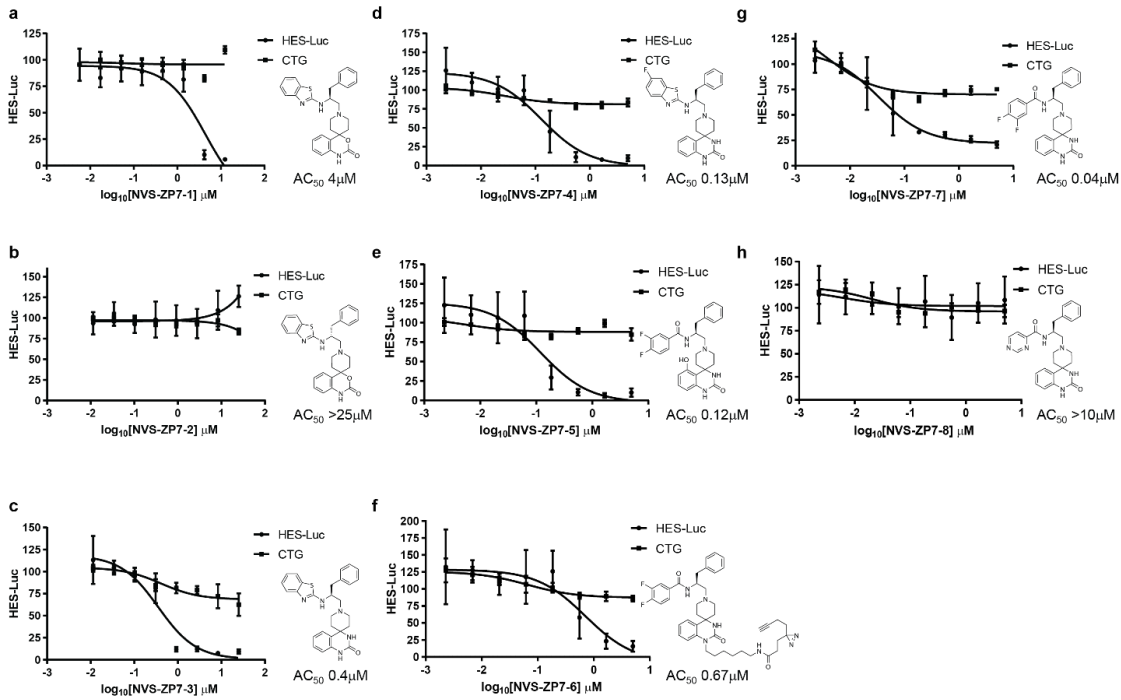

**Supplementary Figure 1. Structure of NVS-ZP7 compounds and activity in Notch signaling HES-Luc reporter gene assay as well as the CTG counter screen.** (a) Dose response of NVS-ZP7-1 in HES-Luc and CTG assays and compound structure. Error bars are standard deviation of the mean from 6 technical replicates. Each experiment was performed two independent times (b) Data for NVS-ZP7-2 (c) Data for NVS-ZP7-3 (d) Data for NVS-ZP7-4 (e) Data for NVS-ZP7-5 (f) Data for NVS-ZP7-6 (g) Data for NVS-ZP7-7 (h) Data for NVS-ZP7-8.

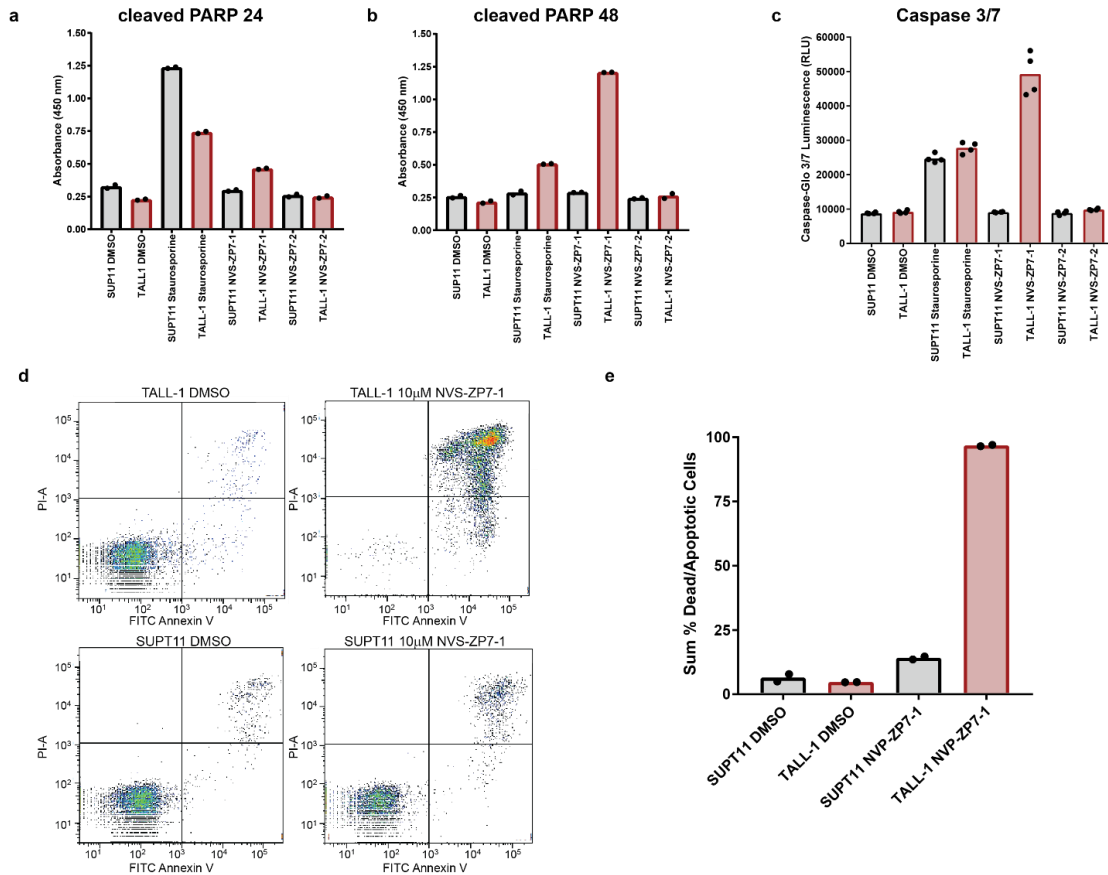

**Supplementary Figure 2. NVS-ZP7-1 induces apoptosis in multiple assay formats.** (a) Induction of cleaved PARP Elisa following DMSO, 10 $\mu$ M NVS-ZP7-1, 10 $\mu$ M NVS-ZP7-2 and 10 $\mu$ M staurosporine for 24hrs. (b) Induction of cleaved PARP Elisa following DMSO, 10 $\mu$ M NVS-ZP7-1, 10 $\mu$ M NVS-ZP7-2 and 10 $\mu$ M staurosporine for 48hrs. Supplementary figures 2a and 2b represent the cleaved PARP absorbance data from one individual experiment in which 2 independent samples are treated with compound. The average readout value for these samples is represented by the dot-plot bar graph. Each experiment was performed 2 independent times. (c) Induction of Caspase-Glo 3/7 activity following DMSO, 10 $\mu$ M NVS-ZP7-1, 10 $\mu$ M NVS-ZP7-2 and 10 $\mu$ M staurosporine for 48hrs. The bar graph represents the caspase-glo 3/7 luminescence data from one individual experiment in which 4 independent samples are treated with compound. The average readout value for these samples is represented by the dot-plot bar graph. Each experiment was performed 2 independent times. (d) FACS plots of PI and FITC annexin V staining gated into quadrants for cells treated with either DMSO or 10 $\mu$ M NVS-ZP7-1. Refer to Supplementary figure 14 for example gating strategy used for PI and FITC annexin V

FACS assay. (e) Sum of % of Dead and % Apoptotic cells from (d) represented as a bar graph. Data shown is an increase in % of dead and apoptotic cells by annexin V/PI staining after compound treatment. Each bar graph represents the data from one individual experiment in which 2 independent samples are treated with compound. The average readout value for these samples is represented by the dot-plot bar graph. Each experiment was performed 2 independent times.

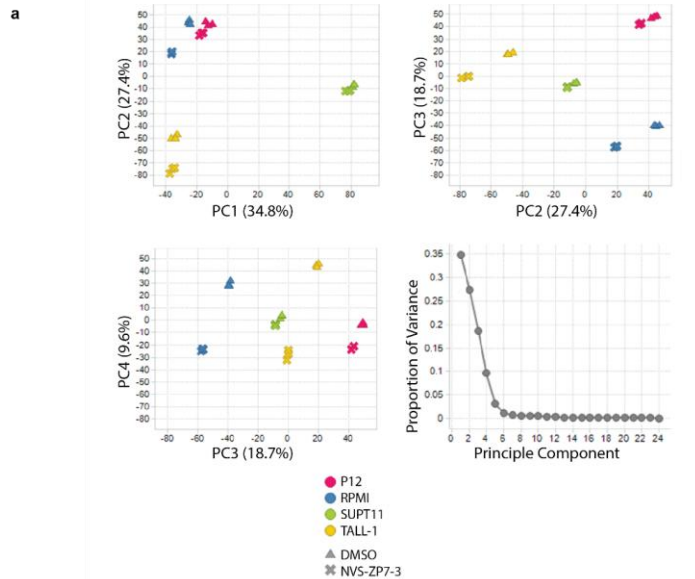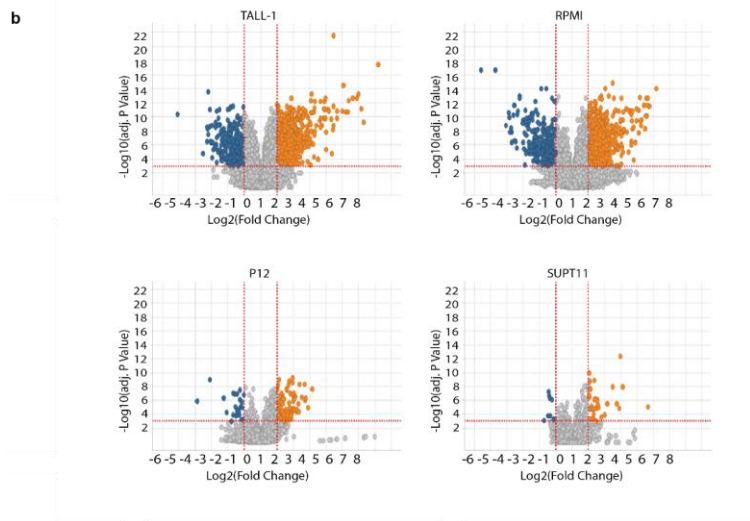

**Supplementary Figure 3. Transcriptional changes induced by NVS-ZIP7-3 are greater in sensitive than resistant cell lines.** (a) Principle component analysis summary showing scatter plots for the first four components, which account for 90.5% of the variance observed. Each point on the plot represents one sample colored by cell line identity and shaped by treatment. Note that biological replicates group closely together, and that the distance between DMSO-

treated and NVS-ZIP7-3-treated samples for each cell line is greater for sensitive cell lines than for insensitive cell lines. (b) Univariate statistical analysis of each cell line comparing treated to vehicle controls. Scatter plots for each cell line show distribution of probe sets with the x-axis indicating Log<sub>2</sub> (Fold Change) and the y-axis the adjusted P-value derived from the moderated T-statistic. The vertical dotted red lines define significant effect size threshold of |Fold Change| > 2 and the horizontal dotted red line defines the adjusted p-value significance threshold of adj.P < 0.001.

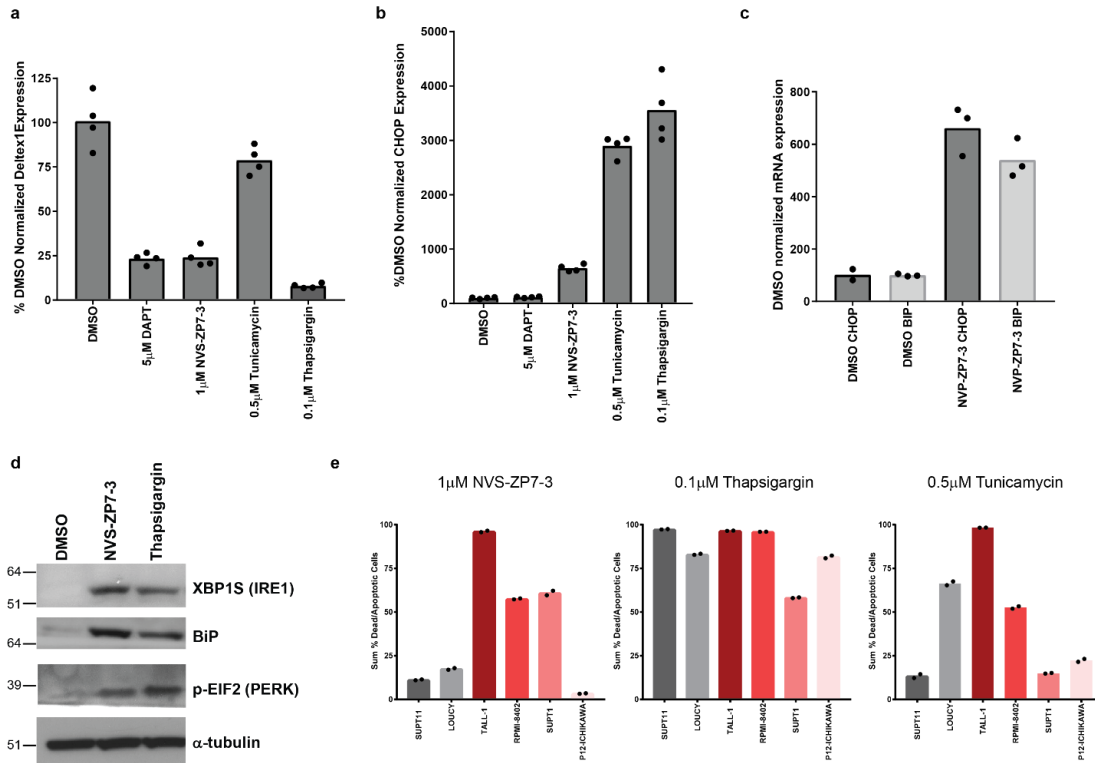

**Supplementary Figure 4. Induction of ER stress mRNA and protein readouts in RPMI-8402 cells.** (a) *Deltex1* (Notch target gene) mRNA expression following treatment with either DMSO, DAPT (gamma secretase inhibitor), NVS-ZP7-3, tunicamycin or thapsigargin for 8hrs. (b) *CHOP* (ER stress target gene) mRNA expression following treatment with either DMSO, DAPT (gamma secretase inhibitor), NVS-ZP7-3, tunicamycin or thapsigargin for 8hrs. DMSO normalized gene expression in supplementary figures 4a, b and c represent the data for the technical replicates of the compound treated samples from one individual experiment. The average readout value for these samples is represented by the dot-plot bar graph. Each experiment was performed 2 independent times. (c) ER stress target gene mRNA expression in a Notch 1 mutant T-ALL cell line. RPMI-8402 cells were treated with 1  $\mu$ M NVS-ZP7-3 for 16hrs. DMSO normalized gene expression is plotted for *BIP* and *CHOP*. (d) Protein levels of ER stress markers in RPMI-8402 cells. Cells were treated with DMSO, 1  $\mu$ M NVS-ZP7-3 or 0.1  $\mu$ M thapsigargin for 4hrs. Spliced XBP1S and p-EIF2 are markers of induction of the IRE1 and PERK arms of the ER stress pathway. The experiment was performed 2 independent times and representative Westerns are shown. Full length gels are shown in Supplementary Figure 14. (e) Increase in % of dead and apoptotic cells by annexin V/PI staining after 72hrs of 1  $\mu$ M NVS-ZP7-

3. 0.1 $\mu$ M thapsigargin, or 0.5 $\mu$ M tunicamycin. Notch pathway active T-ALL cell lines are indicted in shades of red, while Notch pathway inactive cell lines are shown in black/grey. Data shown is an increase in % of dead and apoptotic cells by annexin V/PI staining after compound treatment. Each bar graph represents the data from one individual experiment in which 2 independent samples are treated with compound. The average readout value for these samples is represented by the dot-plot bar graph. Each experiment was performed 3 independent times.



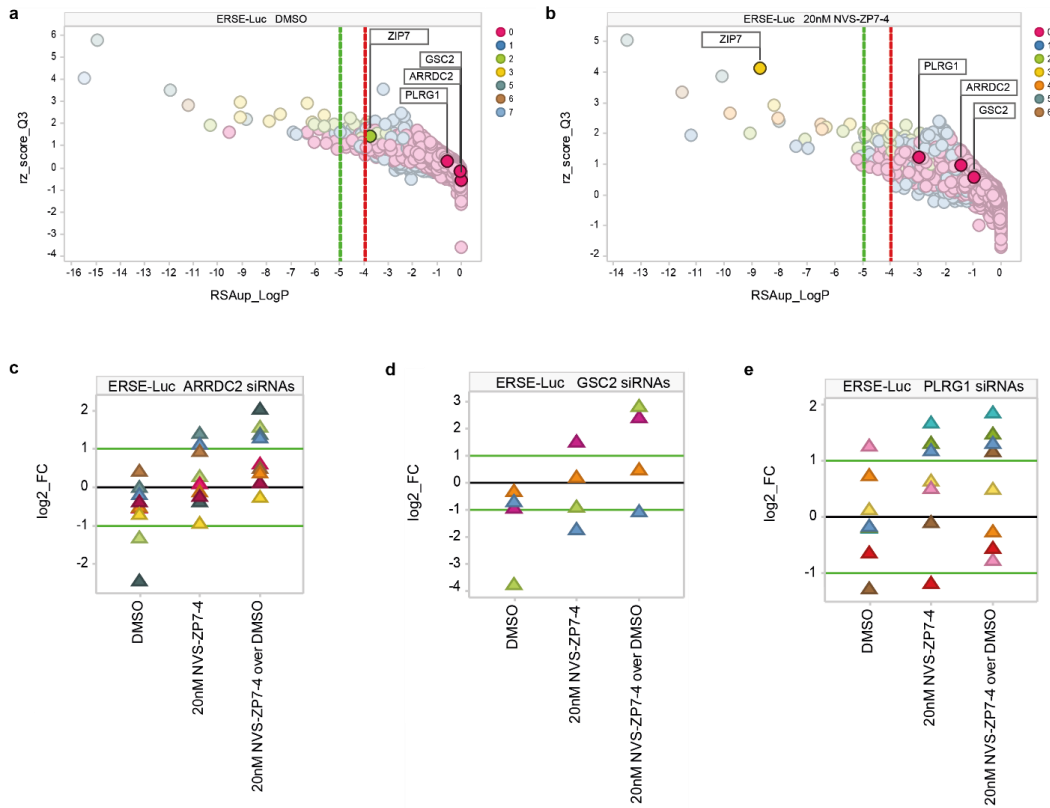

**Supplementary Figure 5. Gene level activity in the ERSE-luc genome-wide siRNA screen.**

(a) Gene level on-target activity in the ERSE-luc assay on the agonist side (increased signaling) was plotted as the gene quartile Q3, as a function of the RSA up log10 p-value (see materials and methods) for the DMSO control. The gene rz\_score Quartile Q3 was plotted as a function of the gene RSA up log10 p-value. Stringent (green line) and loose (red line) significance thresholds of RSA log10 p-value were determined by performing and RSA/Quartile analysis on the dataset with the gene id randomized. Color was set to depict the number of siRNAs per gene where activity (robust z-score) was above +2. (b) Gene level on-target activity in the ERSE-luc assay on the agonist side for 20nM NVS-ZP7-4. Analysis as in (a). (c-e) The log<sub>2</sub> Fold change activity in the ERSE-Luc assay of the siRNAs for the subset of genes highlighted in Figure 4d are represented as a function of each screening condition.

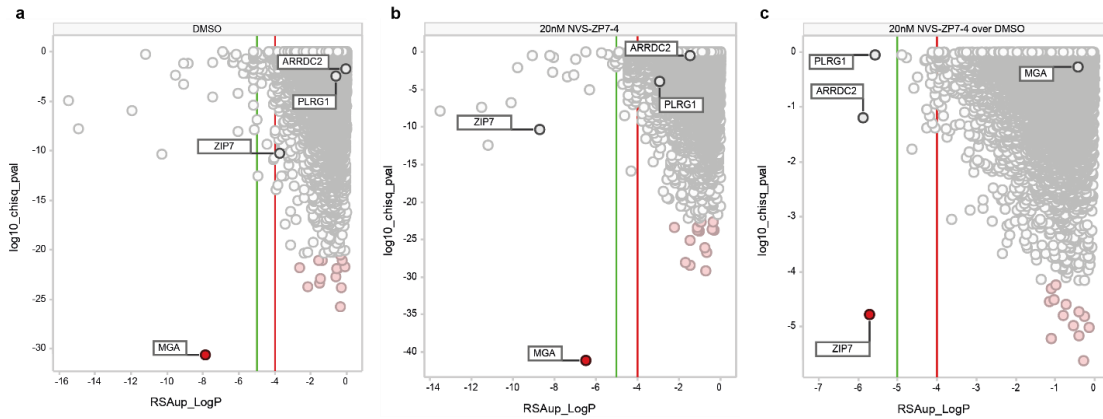

**Supplementary Figure 6. On and off-target activity in the ERSE-luc genome-wide siRNA screen.** The GESS model off-target statistic (Chi-squared log<sub>10</sub> p-value) was plotted as a function of the on-target statistic RSA log<sub>10</sub> p-value on the agonist side (increased signaling) for the individual screening conditions (a) DMSO (b) 20nM NVS-ZP7-4 (c) Differential 20nM NVS-ZP7-4 over DMSO. The stringent and loose thresholds of significance estimated by parallel RSA/Quartile determination on randomized data sets are represented as green (RSA up log<sub>10</sub> p-value <-5) and red (RSA up log<sub>10</sub> p-value <-4) respectively.

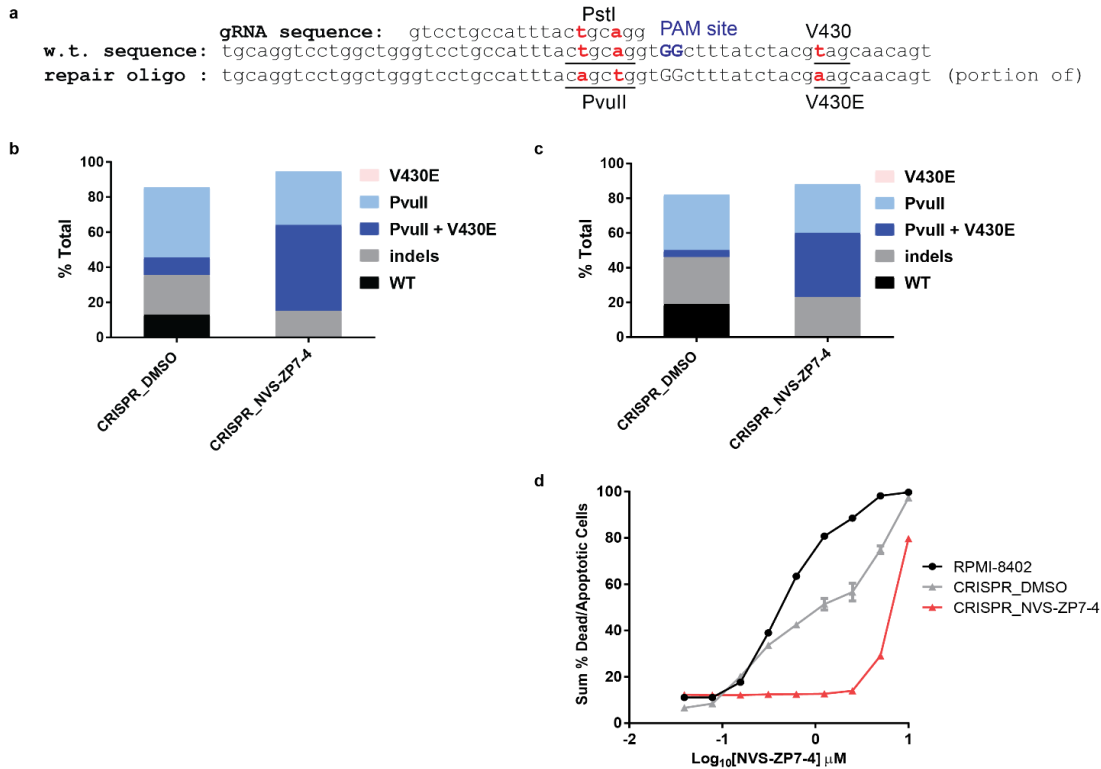

**Supplementary Figure 7. CRISPR to introduce ZIP7 V430E mutation.** (a) Schematic of targeting strategy to introduce ZIP7 V430E mutation including wild-type ZIP7 sequence, sequence of a portion of the repair oligo, CRISPR PAM site and the guide RNA (gRNA). Restriction enzyme sites for PstI and PvuII as well a sequence encoding V430 and E430 are shown. (b) TALL-1 cell line abundance of different alleles in control (CRISPR\_DMSO) and compound treated samples (CRISPR\_NVS-ZP7-4) based on next generation amplicon sequencing. WT denotes wild-type reads while indels refers to other insertions or deletions beyond in-frame repair to PvuII, V430E or PvuII + V430E. (c) RPMI-8402 cell abundance of different alleles in control (CRISPR\_DMSO) and compound treated samples (CRISPR\_NVS-ZP7-4) based on next generation amplicon sequencing. WT denotes wild type reads while indels refers to other insertions or deletions beyond in-frame repair to PvuII, V430E or PvuII + V430E. (d) Effect of 72hrs of NVS-ZP7-4 treatment on apoptosis/cell death as measured by annexin V/PI staining in RPMI-8402 cells, as well as RPMI-8402 cells following introduction of the ZIP7 V430E mutation with CRISPR and short-term selection with either DMSO (CRISPR\_DMSO) or NVS-ZP7-4 (CRISPR\_NVS-ZP7-4). Data shown is an increase in % of dead and apoptotic cells by annexin V/PI staining after compound treatment. The XY line graph

represents the data from one individual experiment in which 2 independent samples are treated with compound. The average readout value for these samples is represented by the points and connecting lines with standard error bars. This exact experiment was performed 2 independent times.

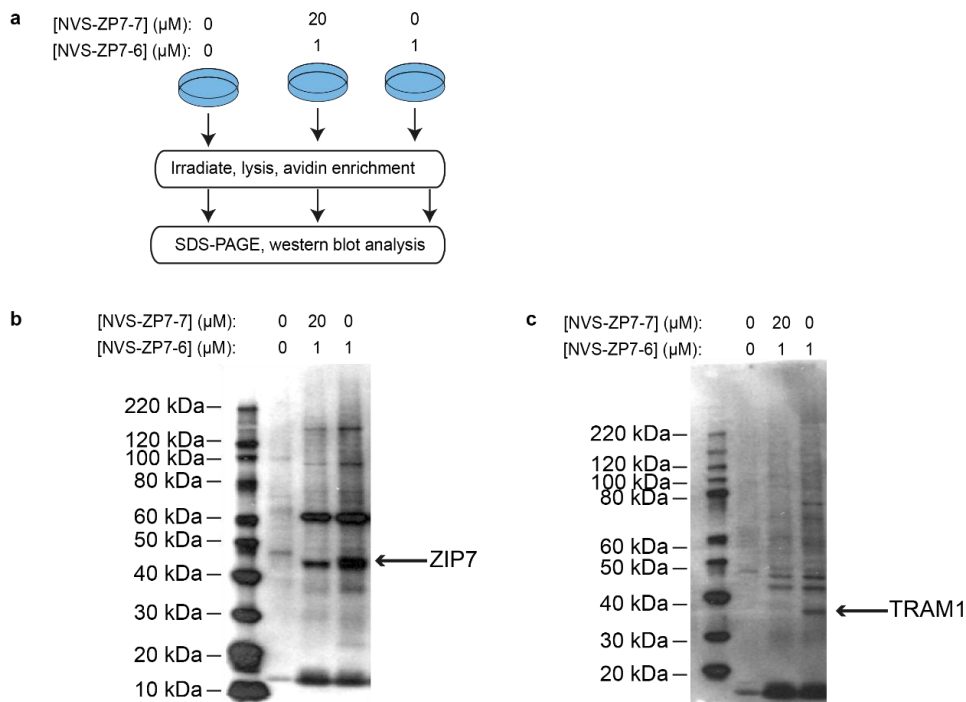

**Supplementary Figure 8. Western blot validation of select targets identified from de novo photoaffinity labeling experiment** (a) Schematic overview of PAL probe titration strategy. Cells were initially treated with 20  $\mu\text{M}$  NVS-ZP7-7 or vehicle for 1 hr. After the 1 hr incubation, cells were treated with NVS-ZP7-6 or vehicle for 1 hr. After incubation with the photoaffinity probe, cells were irradiated, lysed and subjected to avidin enrichment as previously described. (b) Western blot analysis of ZIP7 and (c) TRAM1 demonstrate that both proteins are enriched over samples treated not treated with the photoaffinity probe (NVS-ZP7-6) and that this enrichment could be competed by pre-incubation with NVS-ZP7-7. The experiment was performed two independent times and representative Westerns are shown.

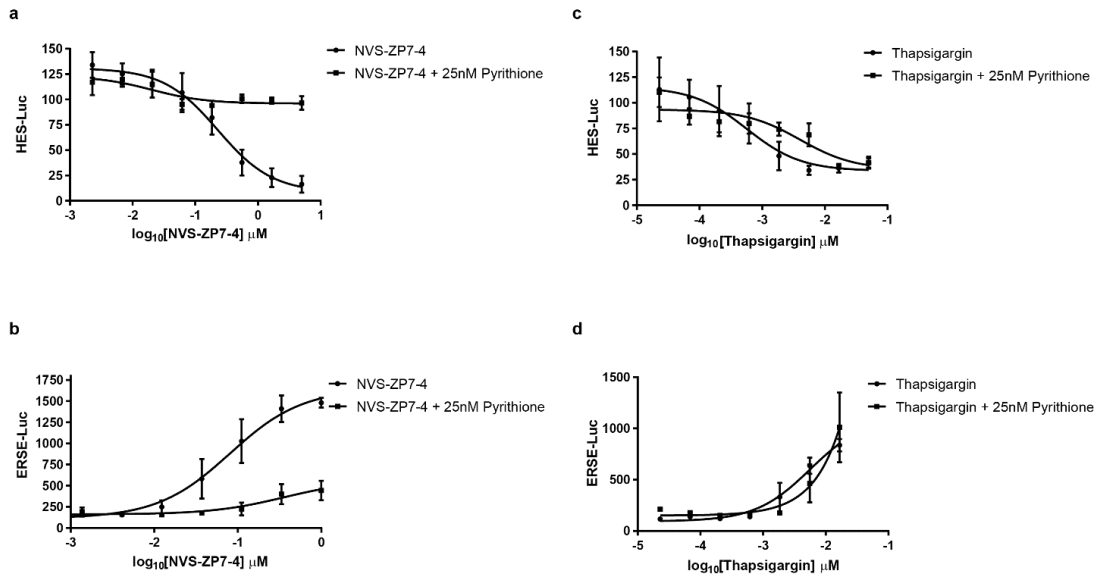

**Supplementary Figure 9. Co-treatment with the zinc ionophore, pyrrithione, rescues the effects of NVS-ZP7-4 but not thapsigargin in HES-Luc and ERSE-Luc assays.** (a) Dose response of NVS-ZP7-4 or NVS-ZP7-4 + 25nM pyrrithione in the Notch signaling, HES-Luc assay. 25nM pyrrithione was selected for all combination studies in both reporter gene assays, as at this dose it has no effect on its own in the HES-Luc or ERSE-Luc assay. (b) Dose response of NVS-ZP7-4 or NVS-ZP7-4 + 25nM pyrrithione in the ER stress, ERSE-Luc assay. (c) Dose response of thapsigargin or thapsigargin + 25nM pyrrithione in the Notch signaling, HES-Luc assay. (d) Dose response of thapsigargin or thapsigargin + 25nM pyrrithione in the ER stress, ERSE-Luc assay. Error bars represent standard deviation of the mean from 6 biological replicates (n=6) in an individual experiment. Each experiment was performed 3 independent times.

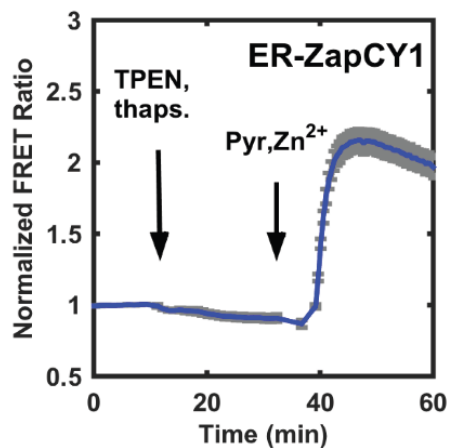

**Supplementary Figure 10. Sensor calibrations determine the response range of ER-ZapCY1.** U2OS cells ( $n = 18$ ), were transfected with ER-ZapCY1 24 hours before imaging. In the ER, ER-ZapCY1 exhibits a small decrease in FRET ratio when treated with the membrane permeable metal chelator N,N,N',N'-tetrakis-(2-pyridylmethyl)-ethylenediamine (TPEN,  $150 \mu\text{M}$ ) and thapsigargin (thaps.,  $10 \mu\text{M}$ ), followed by an increase upon saturation with the ionophore pyrythione (Pyr,  $0.75 \mu\text{M}$ ) and  $\text{Zn}^{2+}$  ( $12 \mu\text{M}$ ). This sensor displays an approximately 2.2-fold increase in FRET ratio upon  $\text{Zn}^{2+}$  saturation. FRET ratios were normalized to the average FRET ratio of each cell before compound treatment. Error bars are the standard error of the mean for one individual experiment.

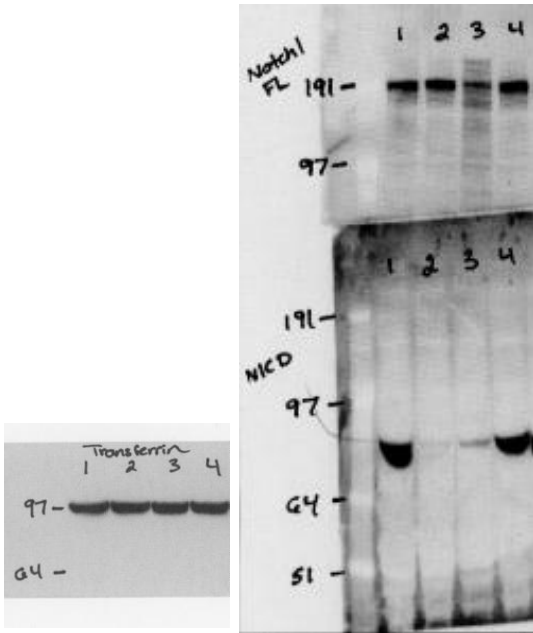

**Supplementary Figure 11. Uncropped Western blots for Figure 1d.** Sample 1: DMSO, Sample 2: DAPT, Sample 3: NVS-ZP7-1, Sample 4: NVS-ZP7-2



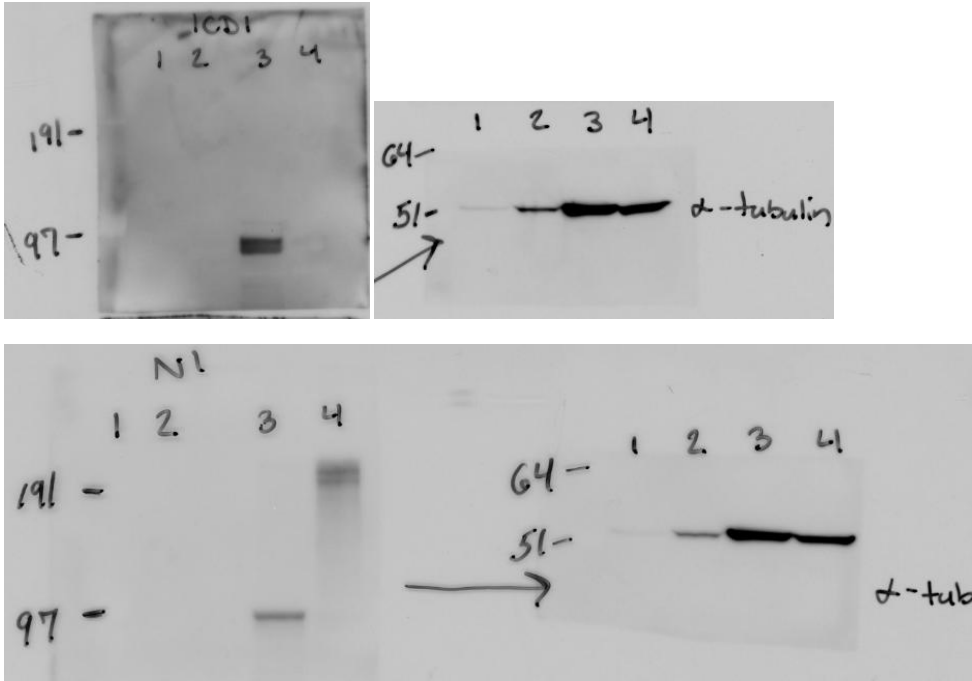

**Supplementary Figure 12. Uncropped Western blots for Figure 1e.** Sample 1: not applicable, Sample 2: not applicable, Sample 3: DMSO, Sample 4: NVS-ZP7-3

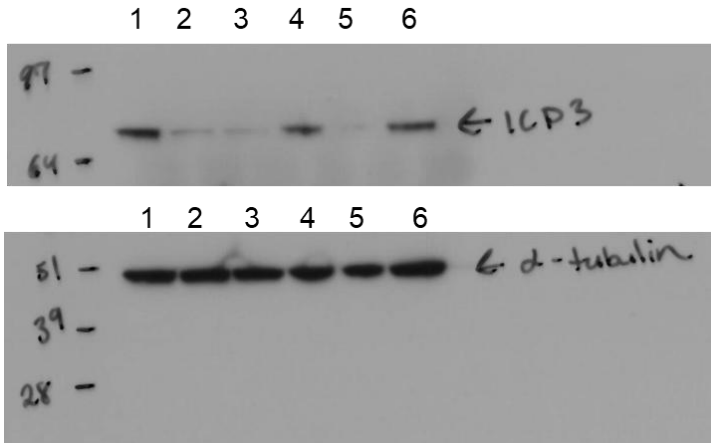

**Supplementary Figure 13. Uncropped Western blots for Figure 3b.** Sample 1: DMSO-parental, Sample 2: DAPT-parental, Sample 3: NVS-ZP7-4-Parental, Sample 4: DMSO-Resistant, Sample 5: DAPT-resistant, Sample 6: NVS-ZP7-4-Resistant

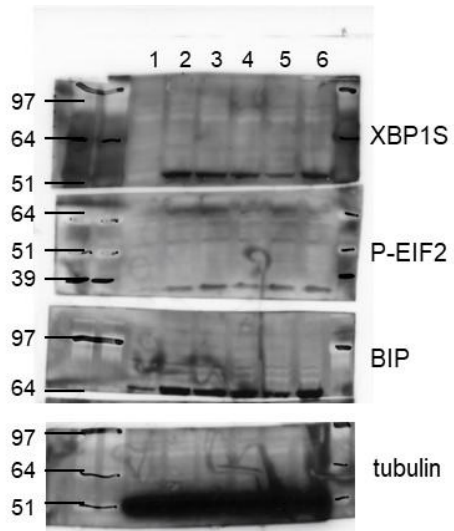

**Supplementary Figure 14. Uncropped Western blots for Supplementary Figure 4d.** Sample 1: DMSO, Sample 2: NVS-ZP7-3, Sample 3: Thapsigargin, Sample 4, 5, 6: not applicable

**Step 1: Forward/side scatter to gate single cells**

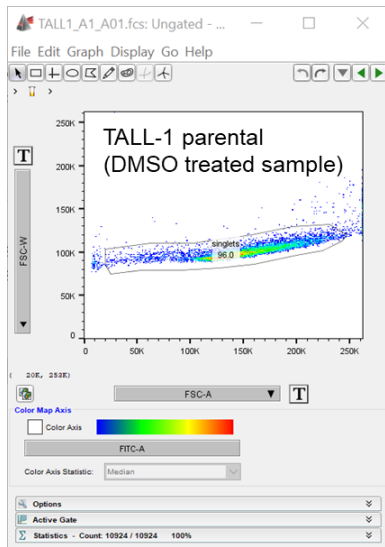

**Step 2: Setting up gating quadrants for cell debris (Q1), dead (Q2), apoptotic (Q3), live (Q4)**

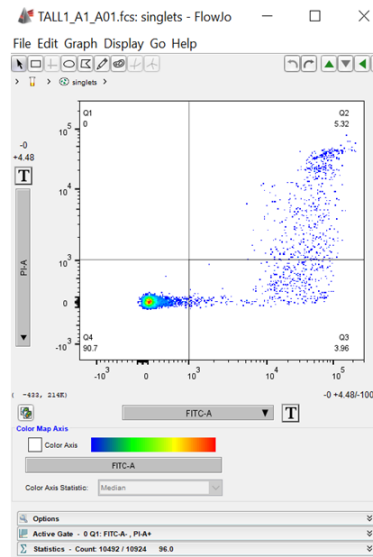

Step 3: Exported statistics for all samples into excel which was used to calculate the sum of the percent dead and apoptotic cells. These values were then put into Graph Pad Prism to generate the dot-plot bar graphs in Figures 2a and 3a and supplementary figures 2e and 4e. The same set of values were put into Graph Pad Prism to generate the XY line graphs in Figure 5b and supplemental figure 7d. The example flow analysis shown here is one of the two DMSO treated TALL-1 parental samples from the experiment shown in Figure 3a.

| Name               | Statistic | #Cells |
|--------------------|-----------|--------|
| TALL1_A1_A01.fcs   |           | 10924  |
| ▼ singlets         | 96.0      | 10492  |
| Q1: FITC-A-, PI-A+ | 0         | 0      |
| Q2: FITC-A+, PI-A+ | 5.32      | 558    |
| Q3: FITC-A+, PI-A- | 3.96      | 416    |
| Q4: FITC-A-, PI-A- | 90.7      | 9518   |

Formatted: Font: (Default) Arial, Bold

Supplementary Figure 15. FACS gating strategy for representative Vybrant apoptosis assay

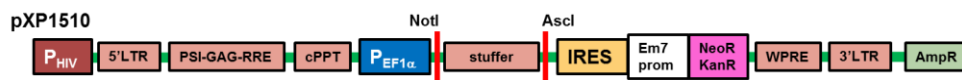

Supplementary Figure 16. Schematic of pXP1510 cloning vector

| Position   | All_AACHANGE | GenomicChange     | Frequency of mutation |
|------------|--------------|-------------------|-----------------------|
| 100        | S100G        | 298A>G            | 2.09%                 |
| <b>173</b> | <b>L173F</b> | <b>517C&gt;T</b>  | <b>5.97%</b>          |
| 173        | L173P        | 518T>C            | 4.75%                 |
| 176        | A176T        | 526G>A            | 2.06%                 |
| 180        | L180F        | 538C>T            | 4.92%                 |
| <b>230</b> | <b>F230S</b> | <b>689T&gt;C</b>  | <b>9.20%</b>          |
| 244        | H244R        | 731A>G            | 1.72%                 |
| 328        | A328V        | 983C>T            | 2.11%                 |
| 332        | T332A        | 994A>G            | 3.15%                 |
| 365        | G365E        | 1094G>A           | 1.59%                 |
| <b>427</b> | <b>F427L</b> | <b>1279T&gt;C</b> | <b>7.52%</b>          |
| 429        | Y429H        | 1285T>C           | 6.44%                 |
| 430        | V430I        | 1288G>A           | 3.92%                 |
| 435        | V435M        | 1303G>A           | 3.51%                 |
| 439        | L439P        | 1316T>C           | 4.37%                 |
| 440        | L440P        | 1319T>C           | 5.68%                 |

**Supplementary Table 1.** Frequency and location of mutations in ZIP7 following variomics experiment and selection with 10 $\mu$ M NVS-ZP7-5

| Cell Line                 | Notch1 HD                            | Notch1 PEST                 | Other                           |
|---------------------------|--------------------------------------|-----------------------------|---------------------------------|
| HPB-ALL <sup>1</sup>      | L1575P (heterozygous)                | 2444 heterozygous insertion |                                 |
| TALL-1 <sup>2</sup>       | Wild-type                            | Wild-Type                   | Notch3 S1580L                   |
| RPMI-8402 <sup>1</sup>    | 1584 heterozygous insertion          | Wild-Type                   |                                 |
| PF382 <sup>1</sup>        | L1575P (heterozygous)                | 2494 heterozygous insertion |                                 |
| Loucy <sup>1</sup>        | Wild-Type                            | Wild-Type                   |                                 |
| SUPT1 <sup>1</sup>        |                                      |                             | t(7;9)(q34;q34.3) translocation |
| SUPT11 <sup>1</sup>       | Wild-Type                            | Wild-Type                   |                                 |
| P12-Ichikawa <sup>1</sup> | 12 amino acid insertion in HD domain |                             |                                 |

**Supplementary Table 2.** T-ALL cell line Notch mutation status

Notch mutation status is described in the following manuscripts

1. Weng, A.P. et al. Activating mutations of NOTCH1 in human T cell acute lymphoblastic leukemia. *Science* **306**, 269-71 (2004).
2. Bernasconi-Elias, P. et al. Characterization of activating mutations of NOTCH3 in T-cell acute lymphoblastic leukemia and anti-leukemic activity of NOTCH3 inhibitory antibodies. *Oncogene* **35**, 6077-6086 (2016).

| <b>Gene</b> | <b>ABI Taqman Probe</b> |
|-------------|-------------------------|
| Deltex1     | Hs00269995_m1           |
| Notch3      | Hs01128541_m1           |
| CHOP        | Hs01090850_m1           |
| BiP         | Hs00946084_g1           |
| PP1A        | Hs99999904_m1           |

**Supplementary Table 3.** ABI Taqman Probes for mRNA quantitation



| Protein                                                     | Antibody                            | Use and Dilution       |
|-------------------------------------------------------------|-------------------------------------|------------------------|
| Anti-Notch1 antibody, extracellular domain                  | Millipore Sigma Catalog # 07-218    | Western 1:1000         |
| Notch1 (5B5) Rat mAb (detects FL and TM-ICD)                | Cell Signaling, Catalog # 3447      | Western 1:500          |
| Cleaved Notch1 (Val1744) (D3B8) Rabbit mAb                  | Cell Signaling, Catalog # 4147      | Western 1:250 or 1:500 |
| Human TfR (Transferrin R) Antibody                          | R&D Systems , Catalog # AF2474      | FACS 10 $\mu$ l        |
| Transferrin Receptor Monoclonal Antibody (H68.4)            | ThermoScientific Catalog # 13-6800  | Western 1:500          |
| $\alpha$ -tubulin mouse monoclonal                          | Sigma Aldrich - #T6199              | Western 1:10000        |
| XBP-1s                                                      | Biologend #647502                   | Western 1:250          |
| BiP (C50B12) Rabbit mAb                                     | Cell Signaling Technologies #3177   | Western 1:1000         |
| p-EIF2 $\alpha$ (Ser51)                                     | Cell Signaling Technologies # 9721  | Western 1:1000         |
| TRAM1                                                       | Abcam ab96106                       | Western 1:1000         |
| SLC39A7/ZIP7 (D1O3A)                                        | Cell Signaling Technologies #33176S | Western 1:1000         |
| Notch3 Intracellular domain                                 | Custom ICD3 Antibody                | Western 1:500          |
| donkey anti-rabbit IgG conjugated to horseradish peroxidase | Amersham Cat#NA9340V                | Western 1:10000        |
| sheep anti-mouse IgG conjugated to horseradish peroxidase   | Amersham Cat# NA931V                | Western 1:10000        |

**Supplementary Table 4.** Antibodies for FACS and Western blotting

Custom ICD3 antibody generation is described in the following reference<sup>1</sup>

1. Bernasconi-Elias, P. et al. Characterization of activating mutations of NOTCH3 in T-cell acute lymphoblastic leukemia and anti-leukemic activity of NOTCH3 inhibitory antibodies. *Oncogene* **35**, 6077-6086 (2016).

| Name           | Details                                              | Sequence                                            |
|----------------|------------------------------------------------------|-----------------------------------------------------|
| Dh1-Zip7 siRNA | Dharmacon On-Targetplus<br>SLC39A7 siRNA J-007338-17 | Target Sequence 5'-<br>CAUCAACAUCAAUCGUGU- 3'       |
| Qi1-Zip7 siRNA | Qiagen<br>Hs_SLC39A7_4FlexiTube<br>siRNA SI00724668  | Target Sequence 5'-<br>ATGGAAGACAAGAGCGTTCTA-<br>3' |
| Dh2 siRNA      | Dharmacon On-Targetplus<br>SLC39A7 siRNA J-007338-18 | Target Sequence 5'-<br>GAAAUAAAGACCUCCGAUC- 3'      |
| Dh3 siRNA      | Dharmacon On-Targetplus<br>SLC39A7 siRNA J-007338-20 | Target Sequence 5'-<br>GACAAGAGCGUUCUACCAA- 3       |
| Neg1           | Dharmacon Neg 1 siRNA D-<br>001810-01                |                                                     |
| Neg3           | Dharmacon Neg 3 siRNA D-<br>001810-03                |                                                     |
| pGL3           |                                                      | Target Sequence 5'-<br>CTTACGCTGAGTACTTCGA- 3'      |
| pGL2           |                                                      | Target Sequence 5'-<br>CGTACGCGGAATACTTCGA- 3'      |
| pGL4           |                                                      | Target Sequence 5'-<br>AAGAAGTGCTCGTCCTCGTCC-<br>3' |

**Supplementary Table 5.** siRNA sequences

| Category | Parameter           | Description                                                                                                                                                                                                                                                                                                                                                                                                                                                                                                                                                     |
|----------|---------------------|-----------------------------------------------------------------------------------------------------------------------------------------------------------------------------------------------------------------------------------------------------------------------------------------------------------------------------------------------------------------------------------------------------------------------------------------------------------------------------------------------------------------------------------------------------------------|
| Assay    | Type of assay       | U2OS Notch ICD inducible Hes-Luc Reporter Gene Assay (RGA)                                                                                                                                                                                                                                                                                                                                                                                                                                                                                                      |
|          | Target              | Notch                                                                                                                                                                                                                                                                                                                                                                                                                                                                                                                                                           |
|          | Primary measurement | Luminescence measurement (Luciferase activity) 30 hours post compound addition                                                                                                                                                                                                                                                                                                                                                                                                                                                                                  |
|          | Key reagents        | Bright Glo (Promega), U2OS Tet-On ICD4 A48 cell line                                                                                                                                                                                                                                                                                                                                                                                                                                                                                                            |
|          | Assay protocol      | <p>4K cells per well plated in 384 well plates in 25uL using a Matrix Wellmate.</p> <p>Incubate O/N at 37°C 5% CO<sub>2</sub></p> <p>10uM final concentration of compound was added to cells (5uL/well) using a BiomekFX</p> <p>2ug/mL Doxycycline was added to wells (5uL/well) using a Matrix Wellmate</p> <p>Plates incubated at 37°C 5%CO<sub>2</sub> for 30 hrs</p> <p>Post incubation Bright Glo:Water (1:1) (30uL/well) was added and plates were incubated at RT for 5 minutes</p> <p>Plates read on Viewlux Imager with an exposure time of 30 sec</p> |
|          | Additional comments | A stable cell line expressing a Notch reporter gene, HES-Luciferase, as well as the Tet-inducible intracellular domain (ICD) of Notch 4 was created and used for this screen. Treatment of the cells with Doxycycline, leads to the production of ICD and activation of the HES-Luciferase reporter. Luciferase activity levels are monitored by adding the substrate luciferin and reading the amount of light produced.                                                                                                                                       |
| Library  | Library size        | 1,155,264                                                                                                                                                                                                                                                                                                                                                                                                                                                                                                                                                       |
|          | Library composition | (Random) screening deck                                                                                                                                                                                                                                                                                                                                                                                                                                                                                                                                         |
|          | Source              | Novartis compound library                                                                                                                                                                                                                                                                                                                                                                                                                                                                                                                                       |
|          | Additional comments |                                                                                                                                                                                                                                                                                                                                                                                                                                                                                                                                                                 |
| Screen   | Format              | 384 well                                                                                                                                                                                                                                                                                                                                                                                                                                                                                                                                                        |

|                   |                                          |                                                                                                                                                       |
|-------------------|------------------------------------------|-------------------------------------------------------------------------------------------------------------------------------------------------------|
|                   | Concentration(s) tested                  | 10uM                                                                                                                                                  |
|                   | Plate controls                           | DMSO (0.5%), no dox well                                                                                                                              |
|                   | Reagent/ compound dispensing system      | Flexdrop (Perkin Elmer) for dilution, VPrep to deliver compounds to cells                                                                             |
|                   | Detection instrument and software        | Viewlux Imager                                                                                                                                        |
|                   | Assay validation/QC                      | Z' value above 0.8 and a signal window greater than 7 fold (luc signal for dox vs no dox).                                                            |
|                   | Correction factors                       | Helios (Novartis internal) analysis software as needed for well masking or correction                                                                 |
|                   | Normalization                            | Plate-based robust Z                                                                                                                                  |
|                   | Additional comments                      |                                                                                                                                                       |
| Post-HTS analysis | Hit criteria                             | 50% inhibition                                                                                                                                        |
|                   | Hit rate                                 | 4.1% primary, 2.8% post <i>in silico</i> triaging                                                                                                     |
|                   | Additional assay(s)                      | Validation: 8-point dose response HES-RGA;<br>Secondary assays: Notch Target Gene qRT-PCR;<br>Counterscreen for cytotoxicity: U2OS TRE Luc Tet-On RGA |
|                   | Confirmation of hit purity and structure | LC/MS                                                                                                                                                 |
|                   | Additional comments                      | Compound hits were triaged (Pipeline Pilot) using chemical unattractiveness, reactivity, and promiscuity filters                                      |

**Supplementary Table 6.** High through-put screen small molecule screening data
